# Supplementary material for: Exploring 2-mercapto- N -arylacetamide analogs as promising anti-melanogenic agents: in vitro and in vivo evaluation
Source: Royal Society of Chemistry journal article supplement (doi:10.1039/d4ob01225a), 2024-01-01
Supplement: d4ob01225a1.pdf [file d4ob01225a1.pdf]

## Supporting Information

For

### Exploring 2-mercapto-*N*-arylacetamide analogs as promising anti-melanogenic agents: In vitro and in vivo evaluation

Hee Jin Jung <sup>a,1</sup>, Hye Soo Park <sup>a,1</sup>, Hye Jin Kim <sup>a,1</sup>, Hyeon Seo Park <sup>a,1</sup>, Young Eun Kim <sup>a</sup>, Da Eun Jeong <sup>a</sup>, Sang Gyun Noh <sup>b</sup>, Yujin Park <sup>c</sup>, Pusoon Chun <sup>d</sup>, Hae Young Chung <sup>b</sup>, Hyung Ryong Moon <sup>a,\*</sup>

<sup>a</sup>*Department of Manufacturing Pharmacy, College of Pharmacy and Research Institute for Drug Development, Pusan National University, Busan 46241, Republic of Korea*

<sup>b</sup>*Department of Pharmacy, College of Pharmacy and Research Institute for Drug Development, Pusan National University, Busan 46241, Republic of Korea*

<sup>c</sup>*Department of Medicinal Chemistry, New Drug Development Center, Daegu-Gyeongbuk Medical Innovation Foundation, Daegu 41061, South Korea*

<sup>d</sup>*College of Pharmacy and Inje Institute of Pharmaceutical Sciences and Research, Inje University, Gimhae, Gyeongnam 50834, Republic of Korea*

<sup>1</sup>These authors (HJ Jung, HS Park, HJ Kim, and HS Park) contributed equally to this work.

\*Corresponding author

## Contents

|                                                                                      |    |
|--------------------------------------------------------------------------------------|----|
| S1. <sup>1</sup> H NMR spectrum of analog <b>1</b> .....                             | 4  |
| S2. <sup>13</sup> C NMR spectrum of analog <b>1</b> .....                            | 5  |
| S3. <sup>1</sup> H NMR spectrum of analog <b>2</b> .....                             | 6  |
| S4. <sup>13</sup> C NMR spectrum of analog <b>2</b> .....                            | 7  |
| S5. <sup>1</sup> H NMR spectrum of analog <b>3</b> .....                             | 8  |
| S6. <sup>13</sup> C NMR spectrum of analog <b>3</b> .....                            | 9  |
| S7. <sup>1</sup> H NMR spectrum of analog <b>4</b> .....                             | 10 |
| S8. <sup>13</sup> C NMR spectrum of analog <b>4</b> .....                            | 11 |
| S9. <sup>1</sup> H NMR spectrum of analog <b>5</b> .....                             | 12 |
| S10. <sup>13</sup> C NMR spectrum of analog <b>5</b> .....                           | 13 |
| S11. <sup>1</sup> H NMR spectrum of analog <b>6</b> .....                            | 14 |
| S12. <sup>13</sup> C NMR spectrum of analog <b>6</b> .....                           | 15 |
| S13. <sup>1</sup> H NMR spectrum of analog <b>7</b> .....                            | 16 |
| S14. <sup>13</sup> C NMR spectrum of analog <b>7</b> .....                           | 17 |
| S15. <sup>1</sup> H NMR spectrum of analog <b>8</b> .....                            | 18 |
| S16. <sup>13</sup> C NMR spectrum of analog <b>8</b> .....                           | 19 |
| S17. <sup>1</sup> H NMR spectrum of analog <b>9</b> .....                            | 20 |
| S18. <sup>13</sup> C NMR spectrum of analog <b>9</b> .....                           | 21 |
| S19. <sup>1</sup> H NMR spectrum of analog <b>10</b> .....                           | 22 |
| S20. <sup>13</sup> C NMR spectrum of analog <b>10</b> .....                          | 23 |
| S21. <sup>1</sup> H NMR spectrum of analog <b>11</b> .....                           | 24 |
| S22. <sup>13</sup> C NMR spectrum of analog <b>11</b> .....                          | 25 |
| <b>S23.</b> Raw data used for IC <sub>50</sub> values in presence of L-tyrosine..... | 26 |

|                                                                                                                            |    |
|----------------------------------------------------------------------------------------------------------------------------|----|
| S24. Graphs used to calculate IC <sub>50</sub> values for <b>1</b> and <b>2</b> in the presence of L-tyrosine.....         | 28 |
| S25. Graphs used to calculate IC <sub>50</sub> values for <b>3</b> and <b>4</b> in the presence of L-tyrosine.....         | 29 |
| S26. Graphs used to calculate IC <sub>50</sub> values for <b>6</b> and <b>7</b> in the presence of L-tyrosine.....         | 30 |
| S27. Graphs used to calculate IC <sub>50</sub> values for <b>8</b> and <b>9</b> in the presence of L-tyrosine.....         | 31 |
| S28. Graphs used to calculate IC <sub>50</sub> values for <b>10</b> and <b>11</b> in the presence of L-tyrosine.....       | 32 |
| <b>S29.</b> Graphs used to calculate IC <sub>50</sub> values for kojic acid in the presence of L-tyrosine.....             | 33 |
| <b>S30.</b> Raw data used for IC <sub>50</sub> values in the presence of L-dopa.....                                       | 34 |
| S31. Graphs used to calculate IC <sub>50</sub> values for <b>1</b> and <b>2</b> in the presence of L-dopa.....             | 36 |
| S32. Graphs used to calculate IC <sub>50</sub> values for <b>3</b> and <b>4</b> in the presence of L-dopa.....             | 37 |
| S33. Graphs used to calculate IC <sub>50</sub> values for <b>5</b> and <b>6</b> in the presence of L-dopa.....             | 38 |
| S34. Graphs used to calculate IC <sub>50</sub> values for <b>7</b> and <b>8</b> in the presence of L-dopa.....             | 39 |
| S35. Graphs used to calculate IC <sub>50</sub> values for <b>9</b> and <b>10</b> in the presence of L-dopa.....            | 40 |
| <b>S36.</b> Graphs used to calculate IC <sub>50</sub> values for <b>11</b> and kojic acid in the presence of L-dopa.....   | 41 |
| S37. Original western blot for analog <b>7</b> (1st set) .....                                                             | 42 |
| S38. Quantification analysis of protein expressions for analog <b>7</b> by CS analyzer software program.....               | 43 |
| <b>S39.</b> Original western blot for analog <b>7</b> (2nd set) .....                                                      | 44 |
| <b>S40.</b> Original western blot for analog <b>7</b> (3rd set) .....                                                      | 45 |
| <b>S41.</b> Copper chelation activity of kojic acid and 2-MAA analogs <b>1–11</b> using a pyrocatechol violet reagent..... | 46 |
| <b>S42.</b> Effect of analogs <b>1, 2, 7,</b> and <b>9</b> on HaCaT cell viability.....                                    | 47 |

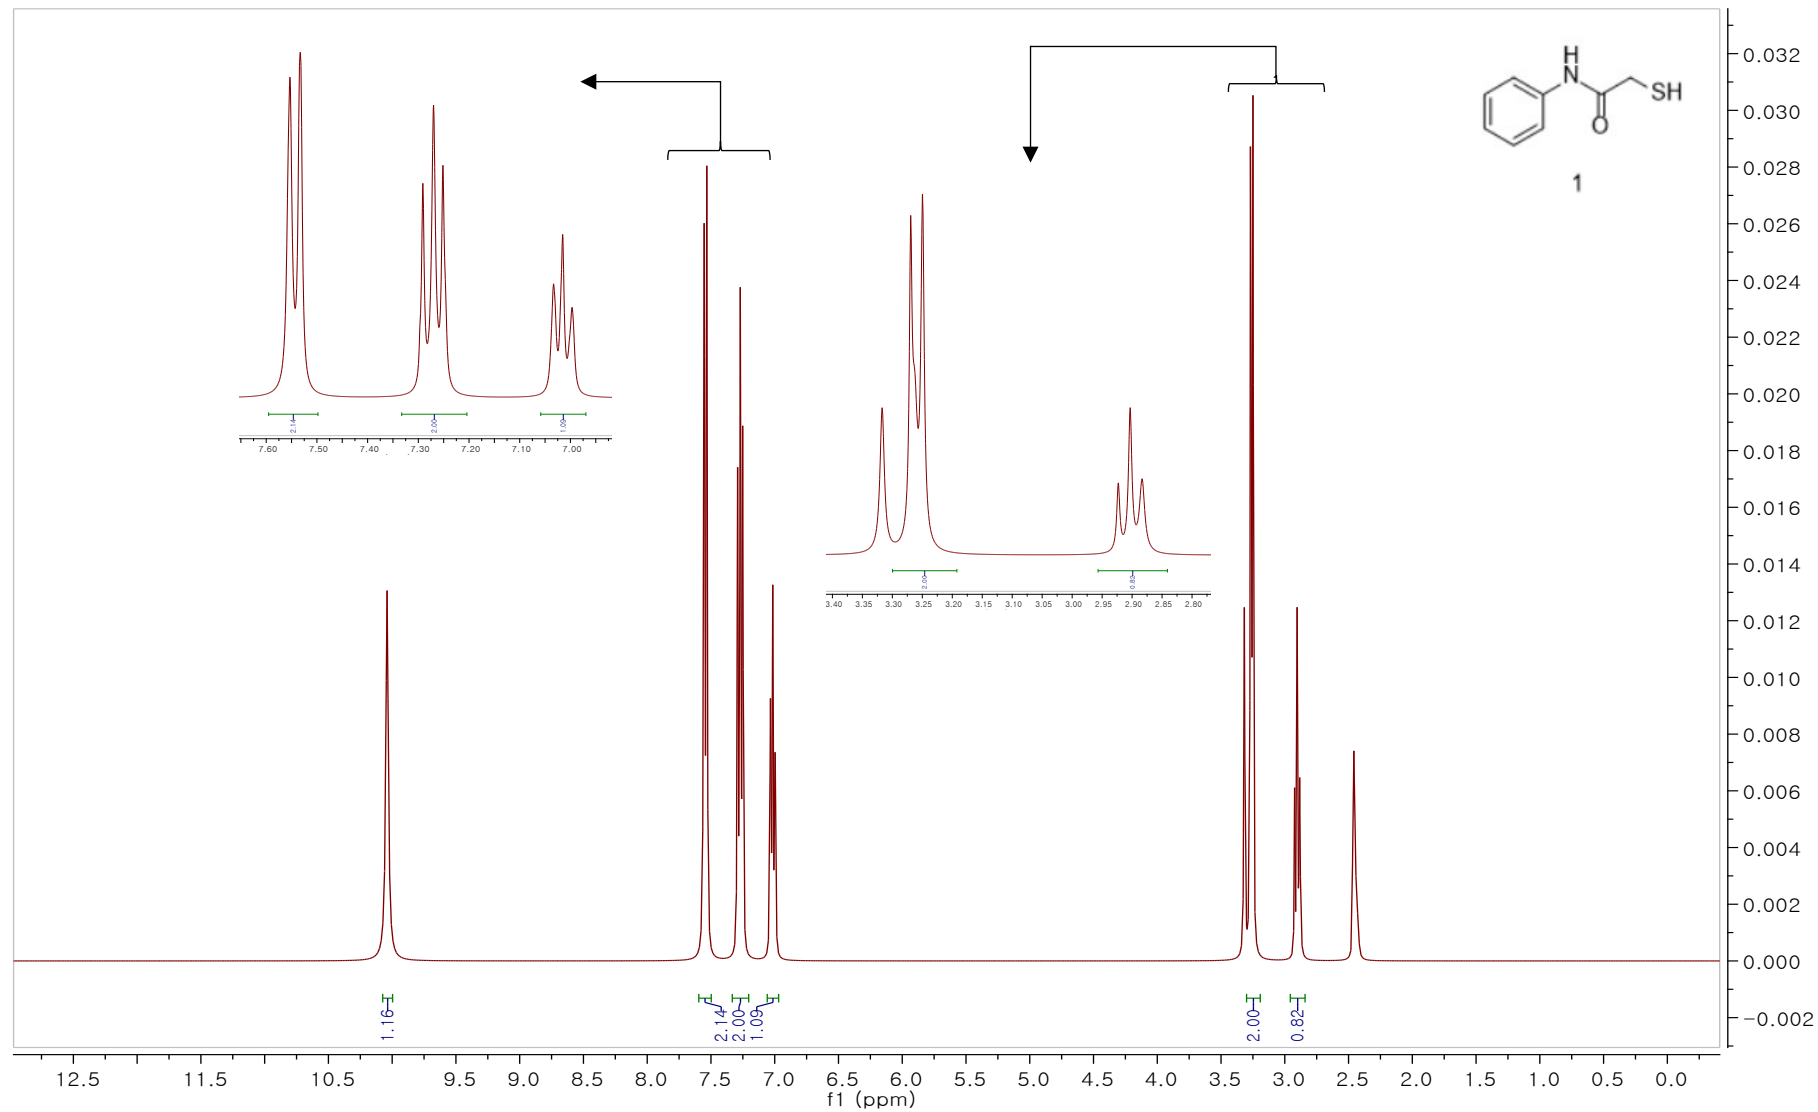

S1.  $^1\text{H}$  NMR spectrum of analog 1

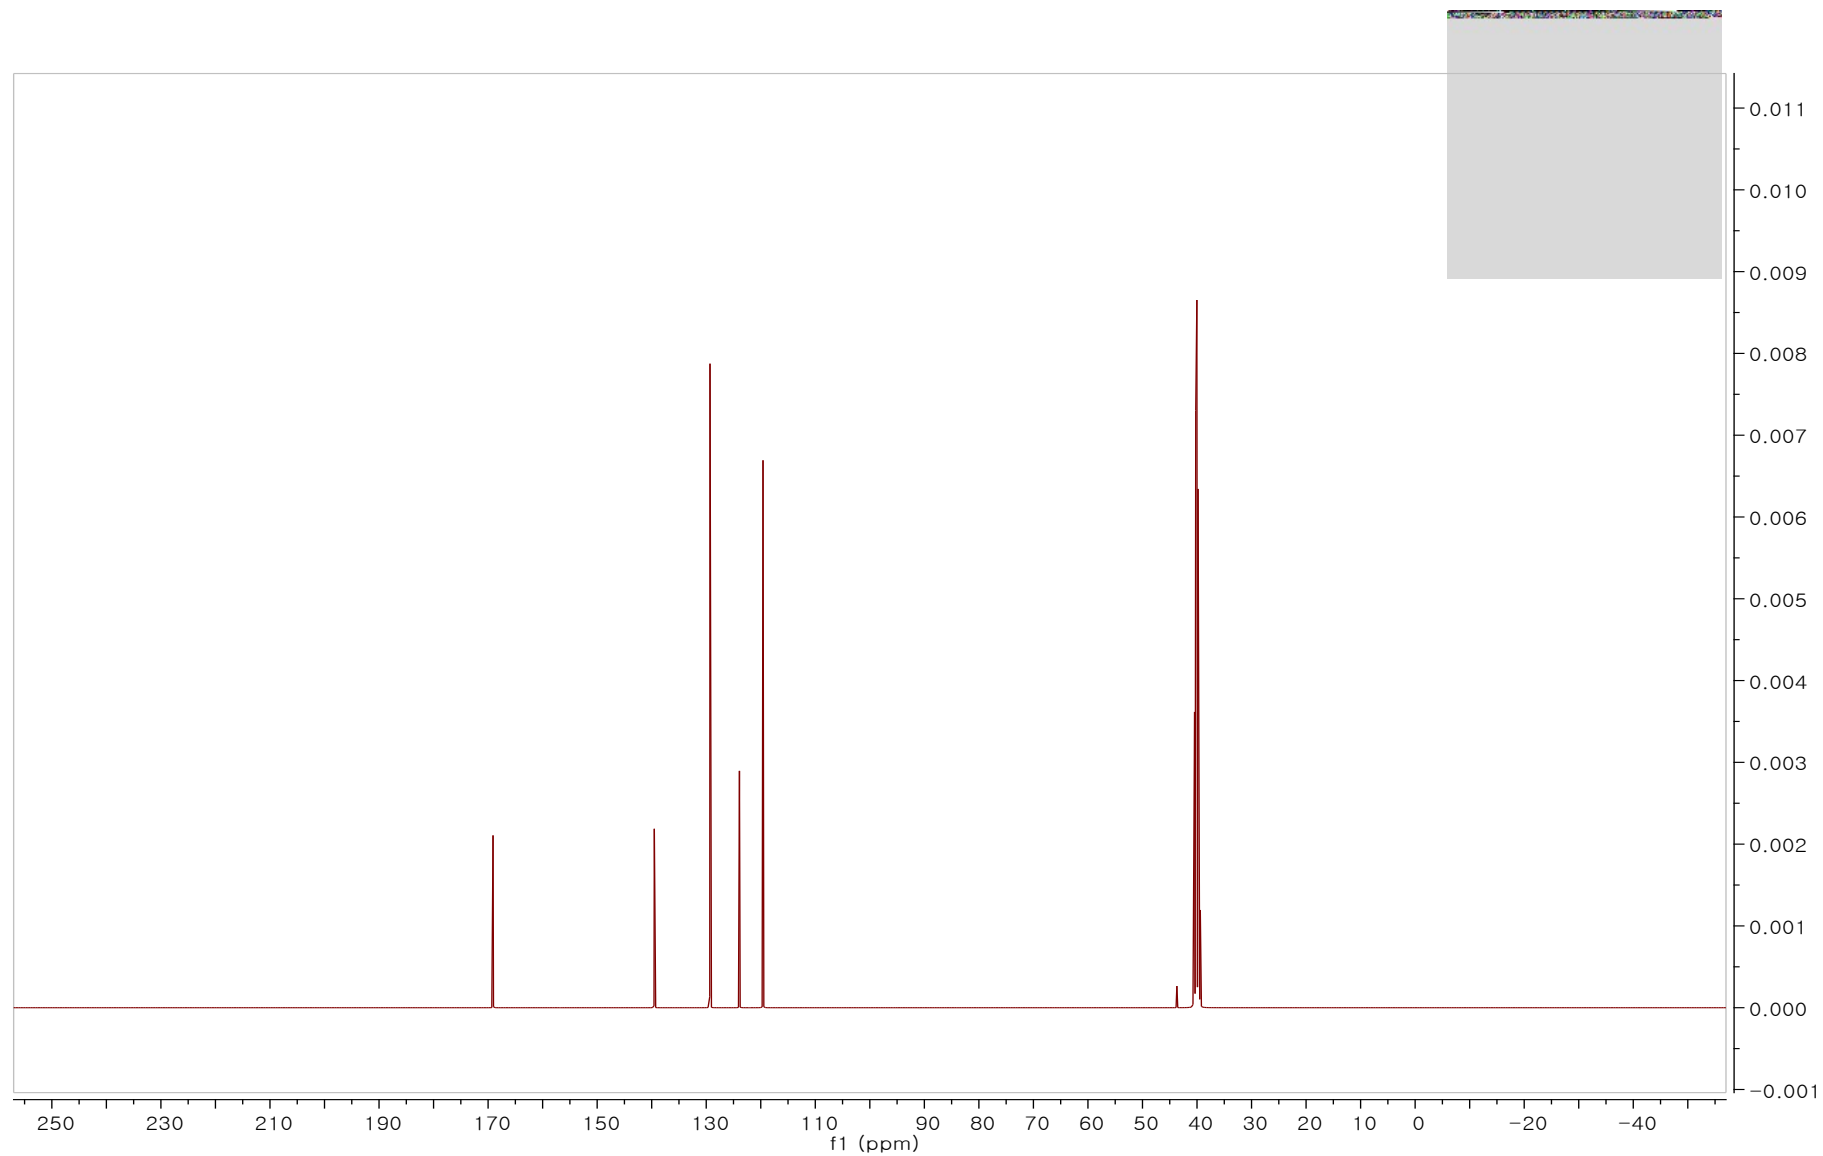

S2.  $^{13}\text{C}$  NMR spectrum of analog 1

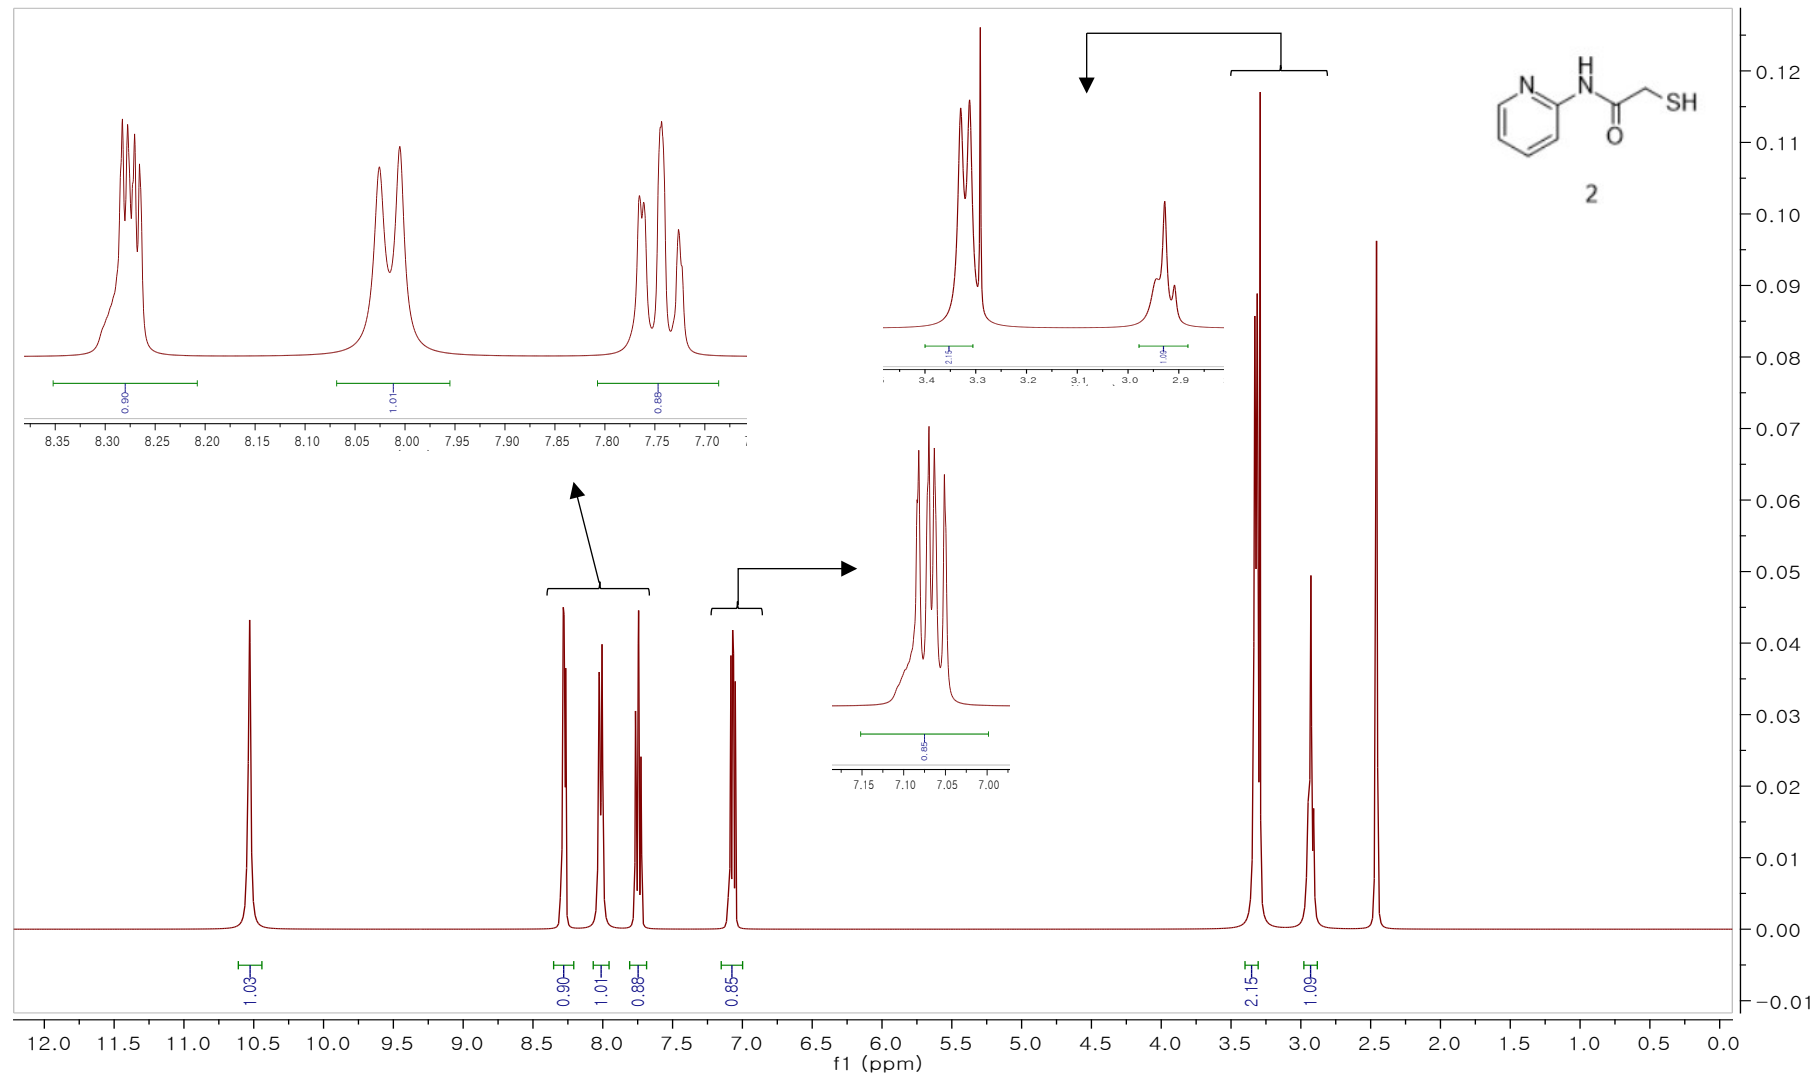

S3.  $^1\text{H}$  NMR spectrum of analog **2**

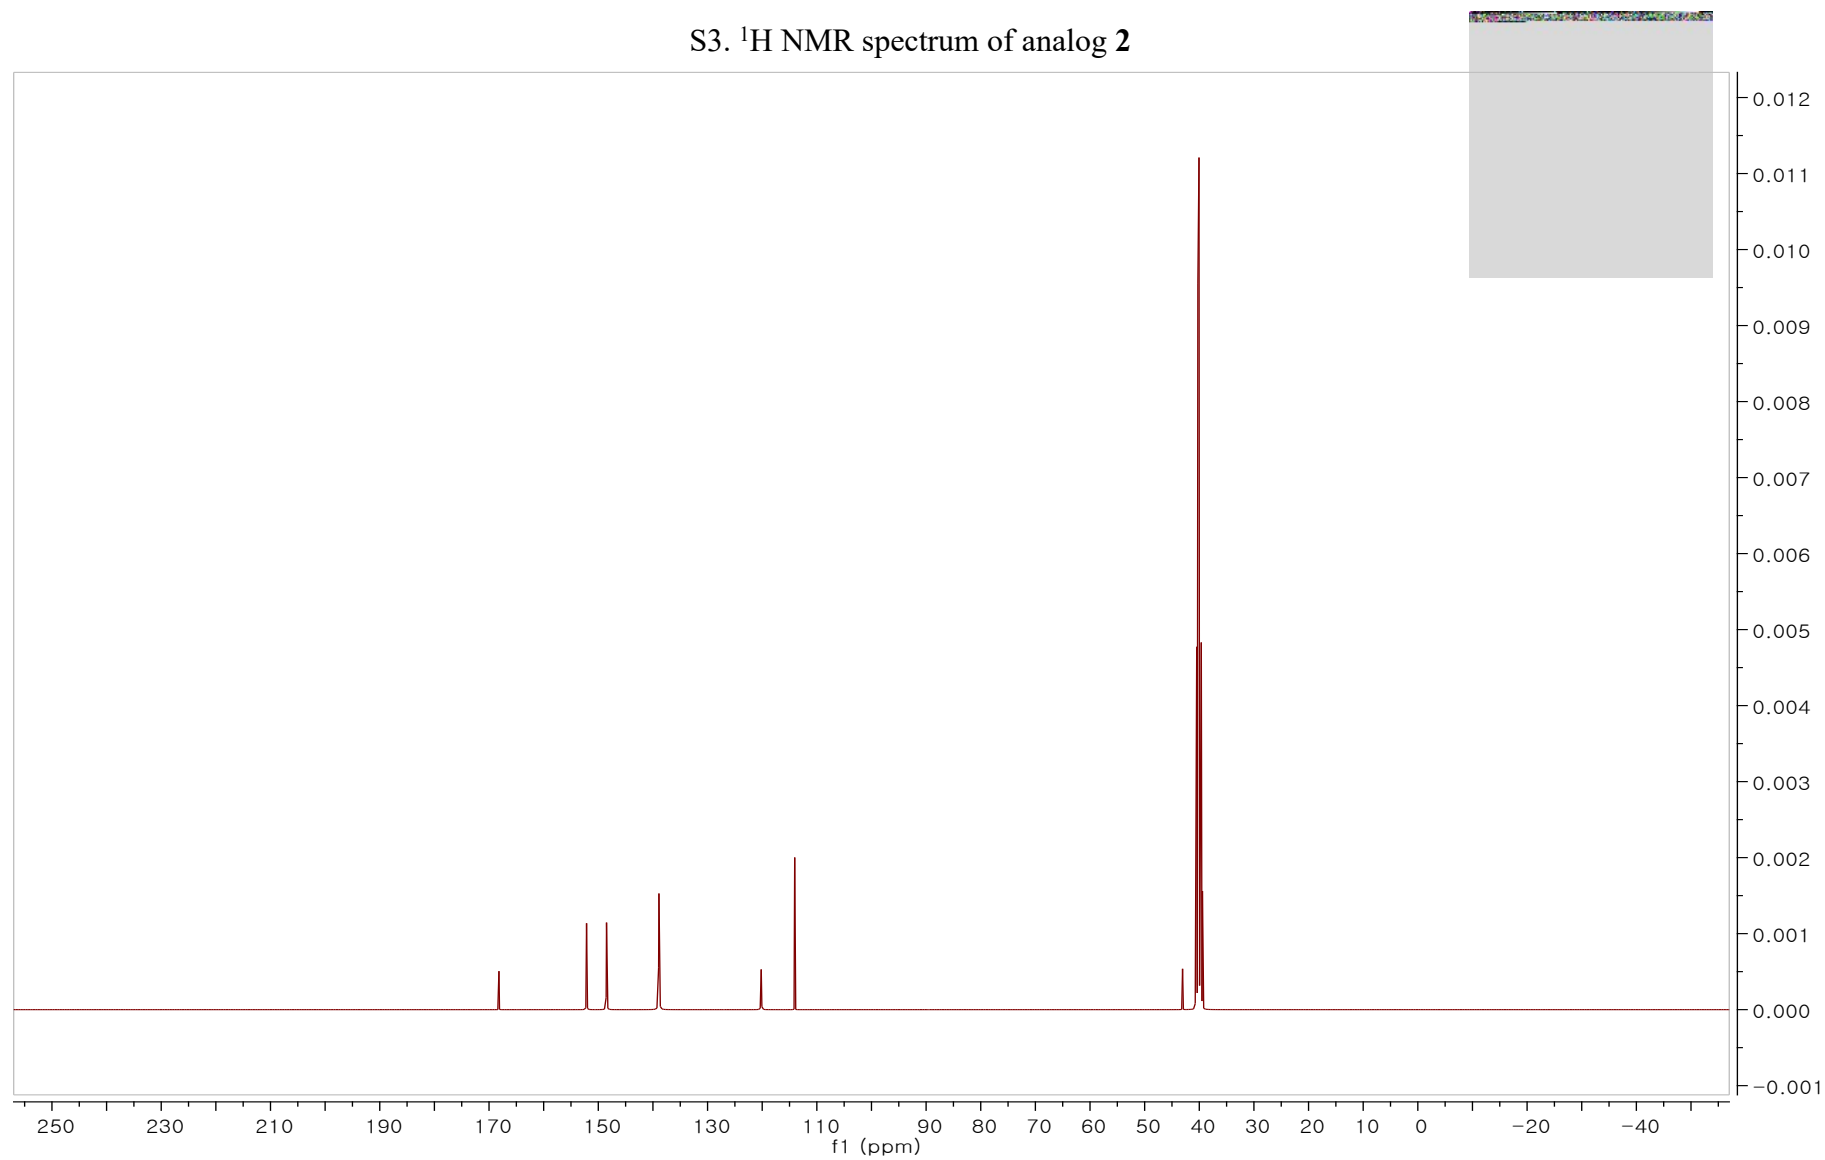

S4. <sup>13</sup>C NMR spectrum of analog 2

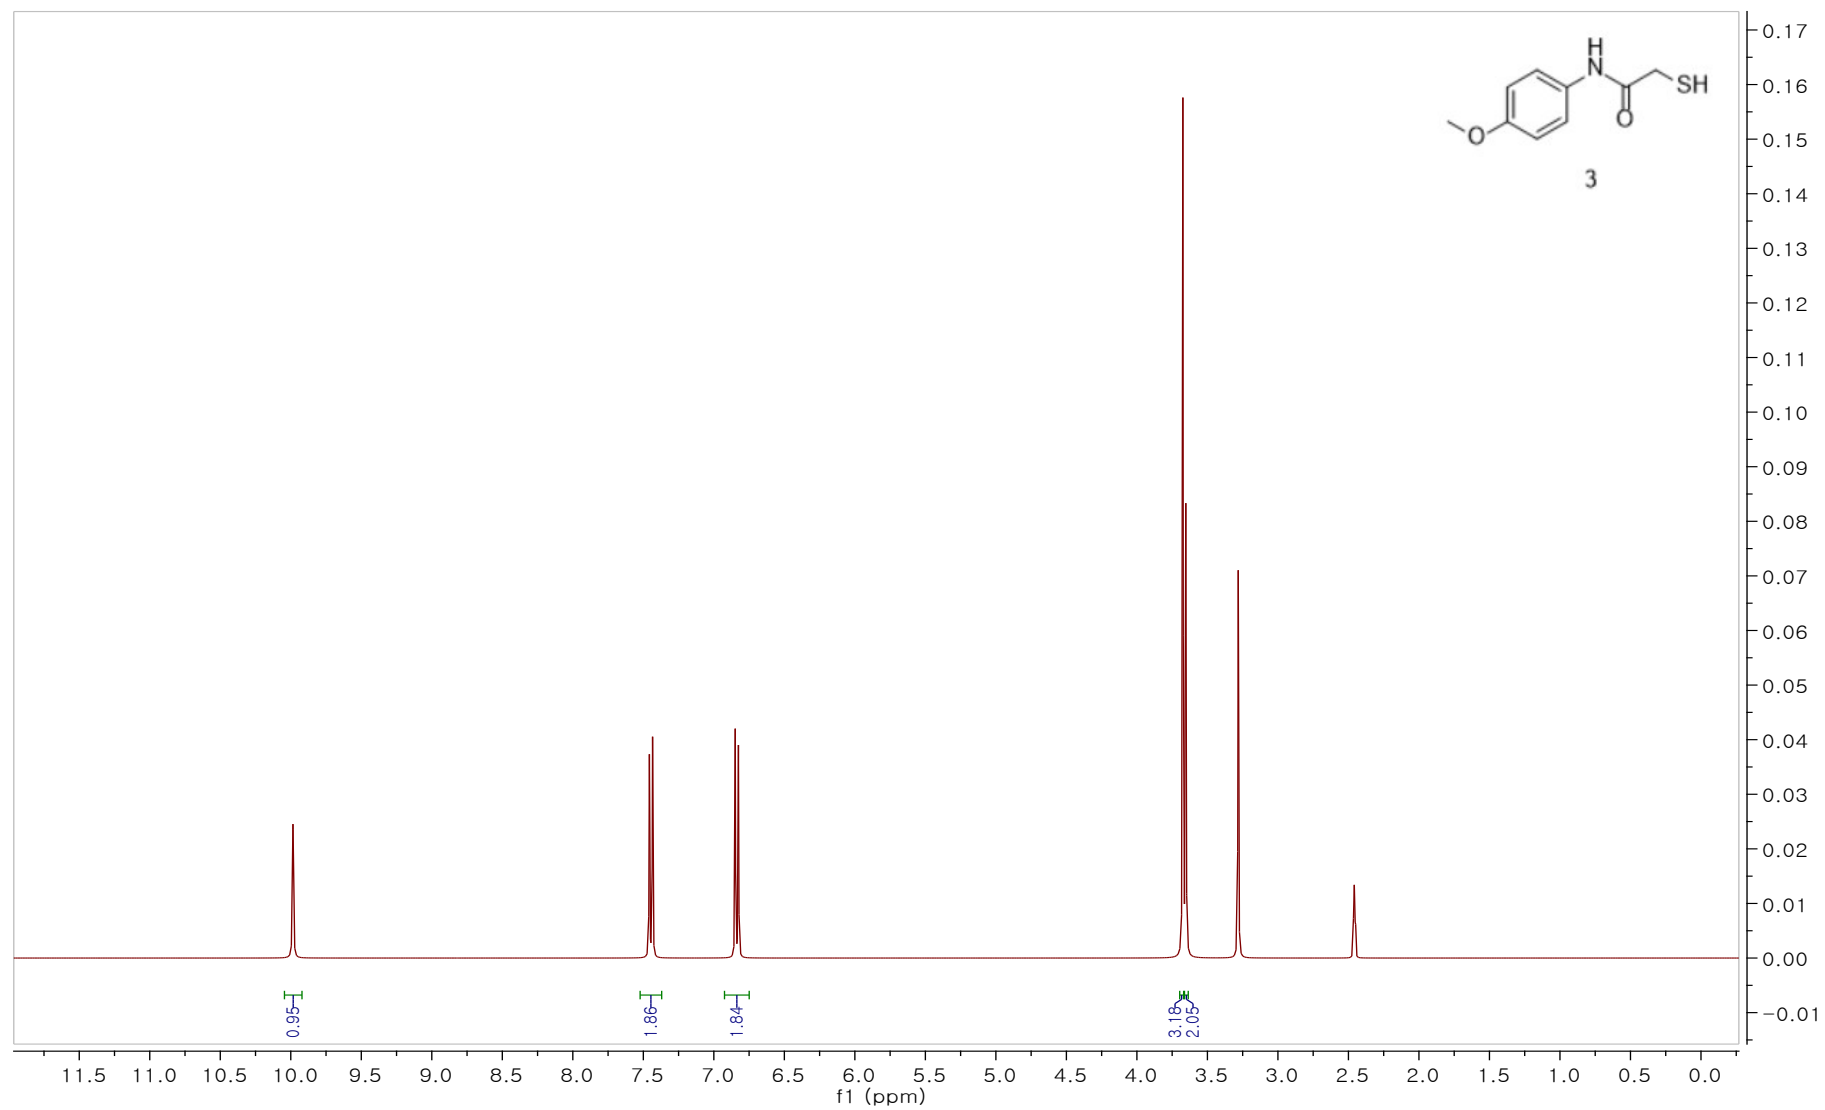



S5.  $^1\text{H}$  NMR spectrum of analog **3**

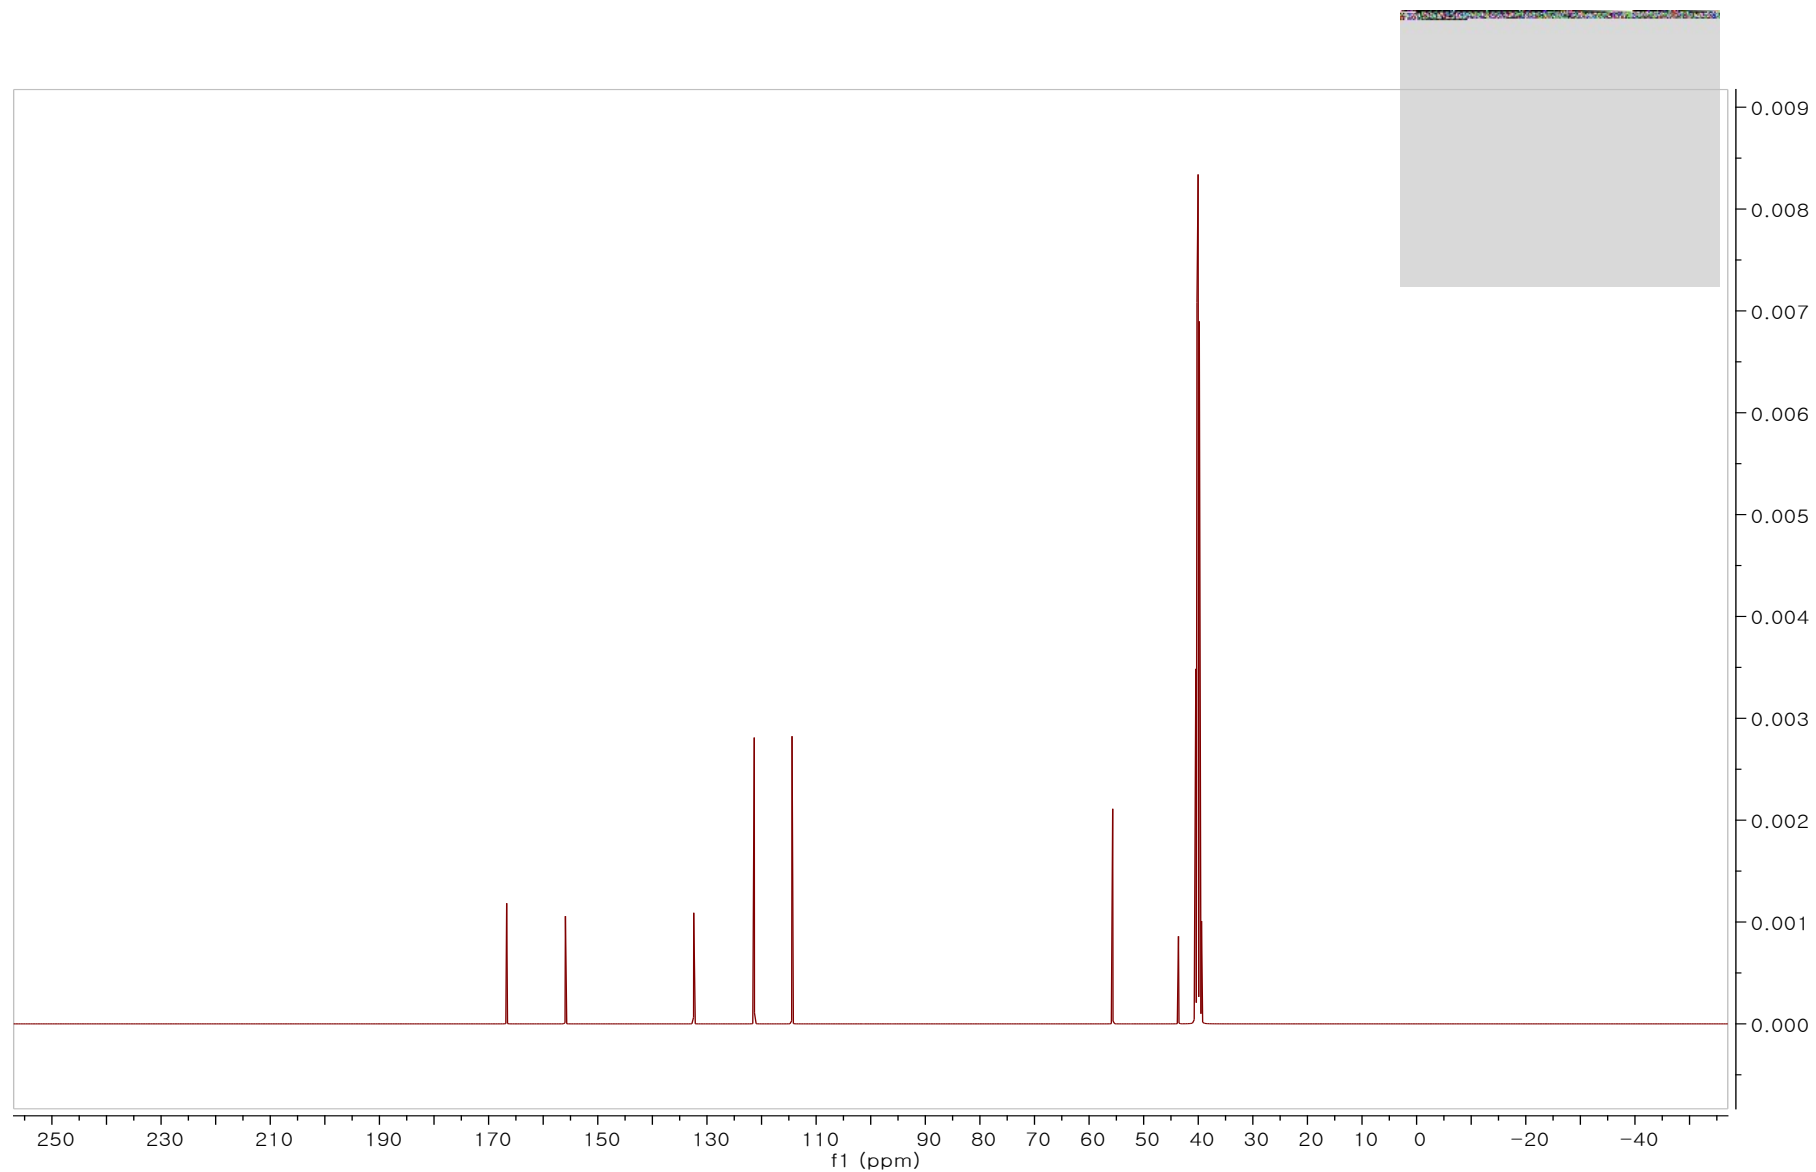

S6.  $^{13}\text{C}$  NMR spectrum of analog 3

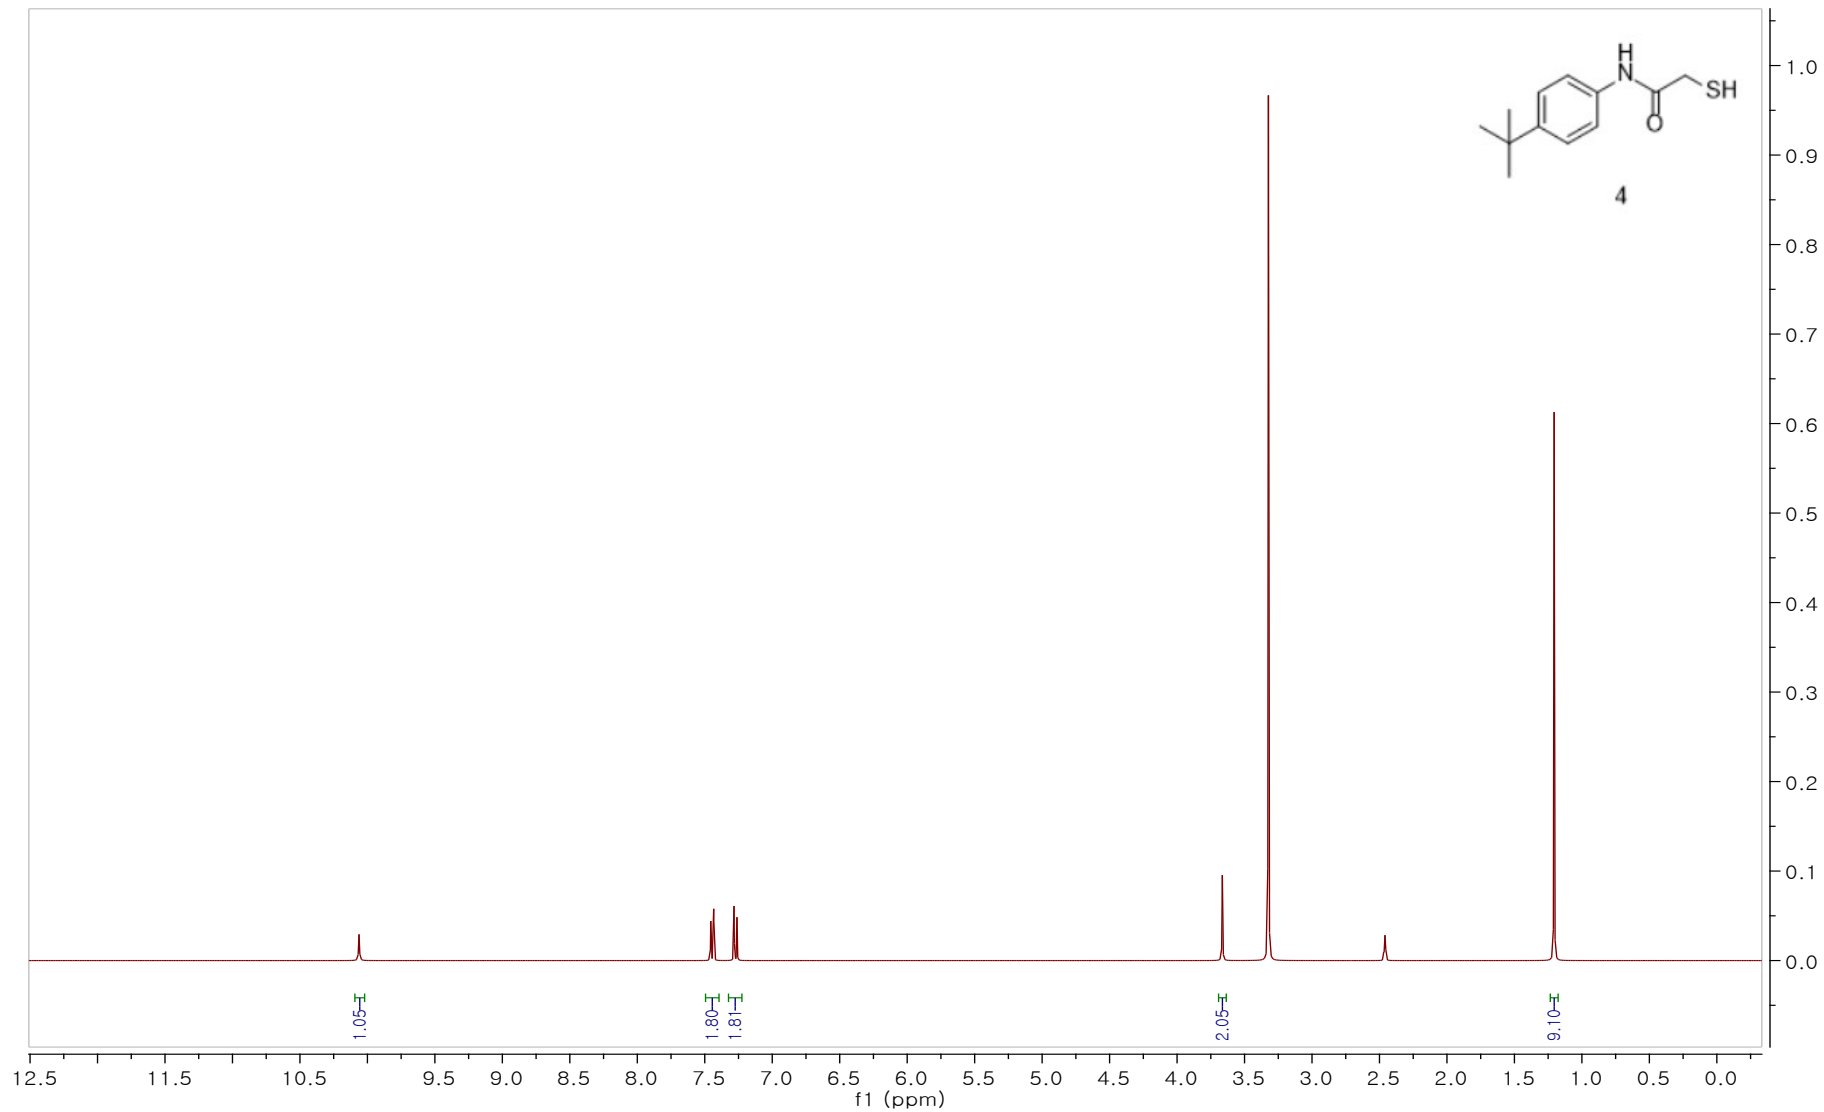

S7. <sup>1</sup>H NMR spectrum of analog 4

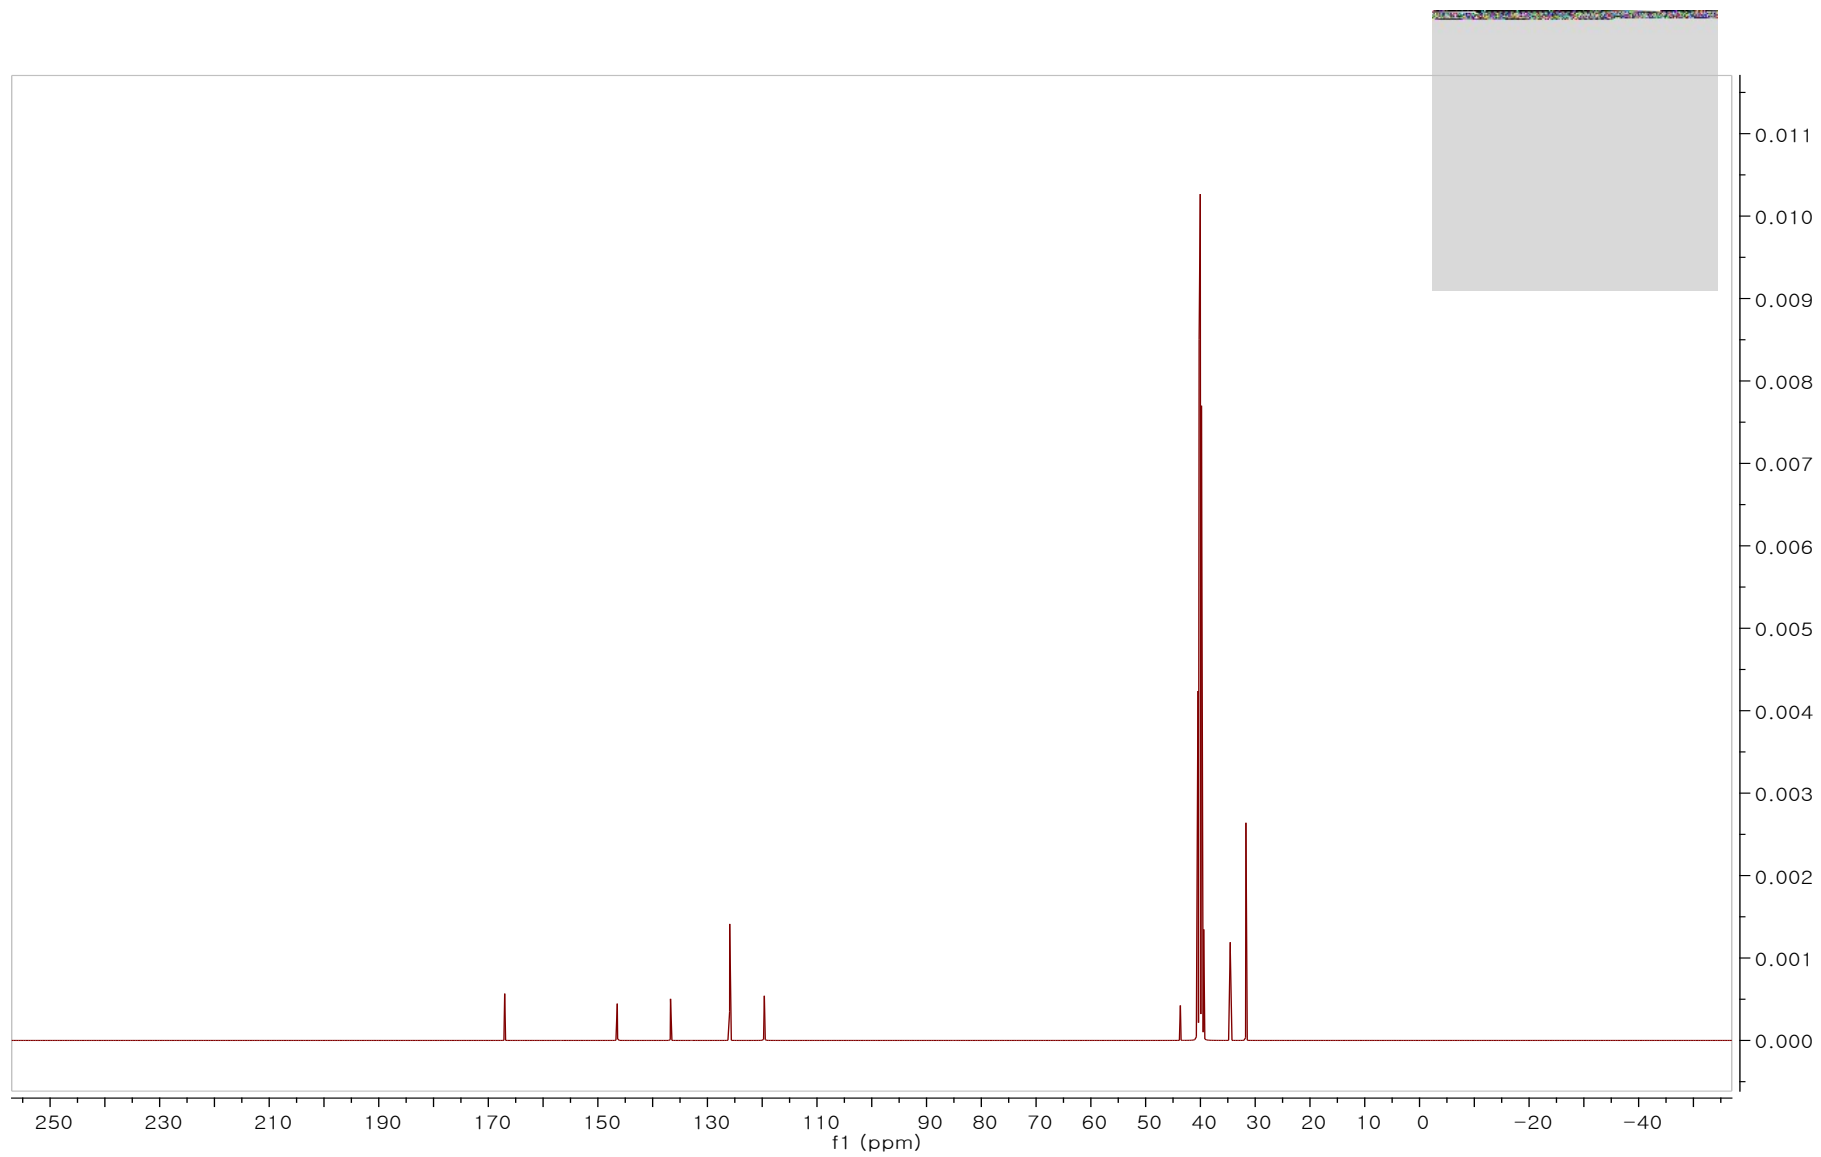

S8.  $^{13}\text{C}$  NMR spectrum of analog 4

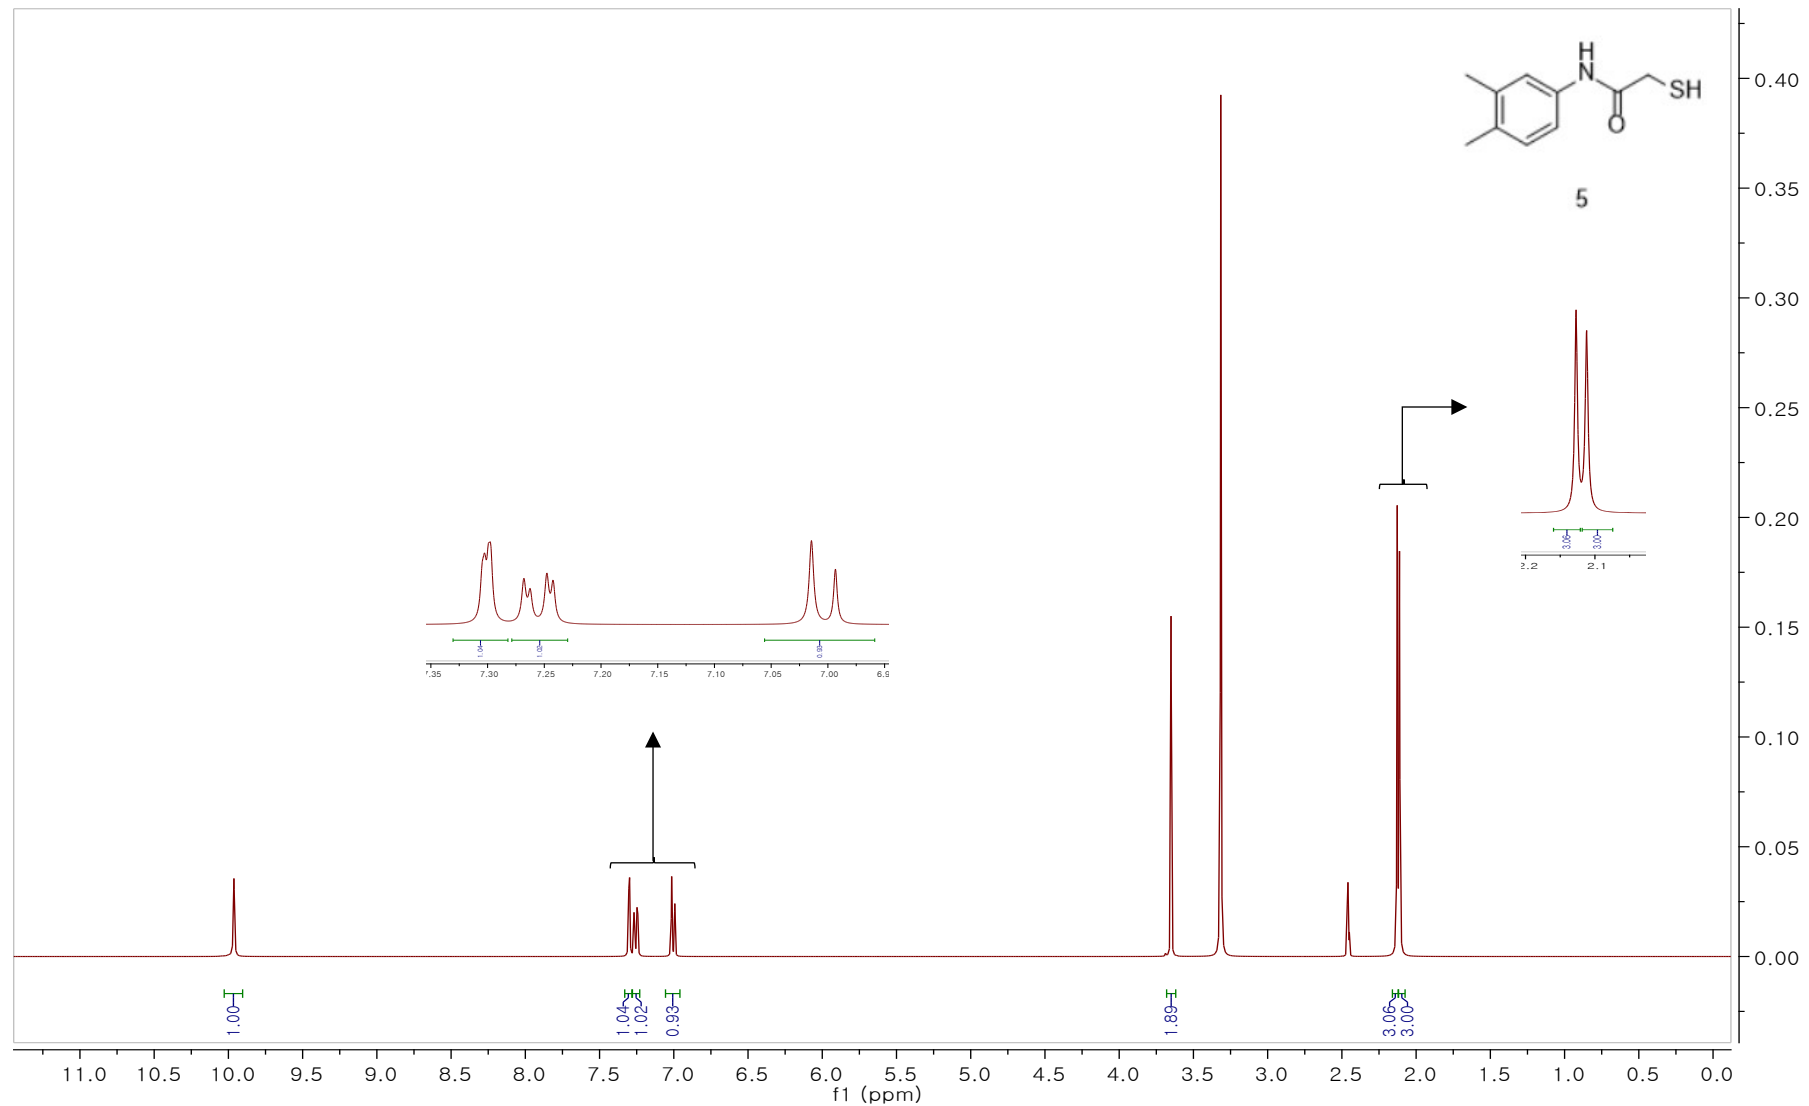

S9. <sup>1</sup>H NMR spectrum of analog 5

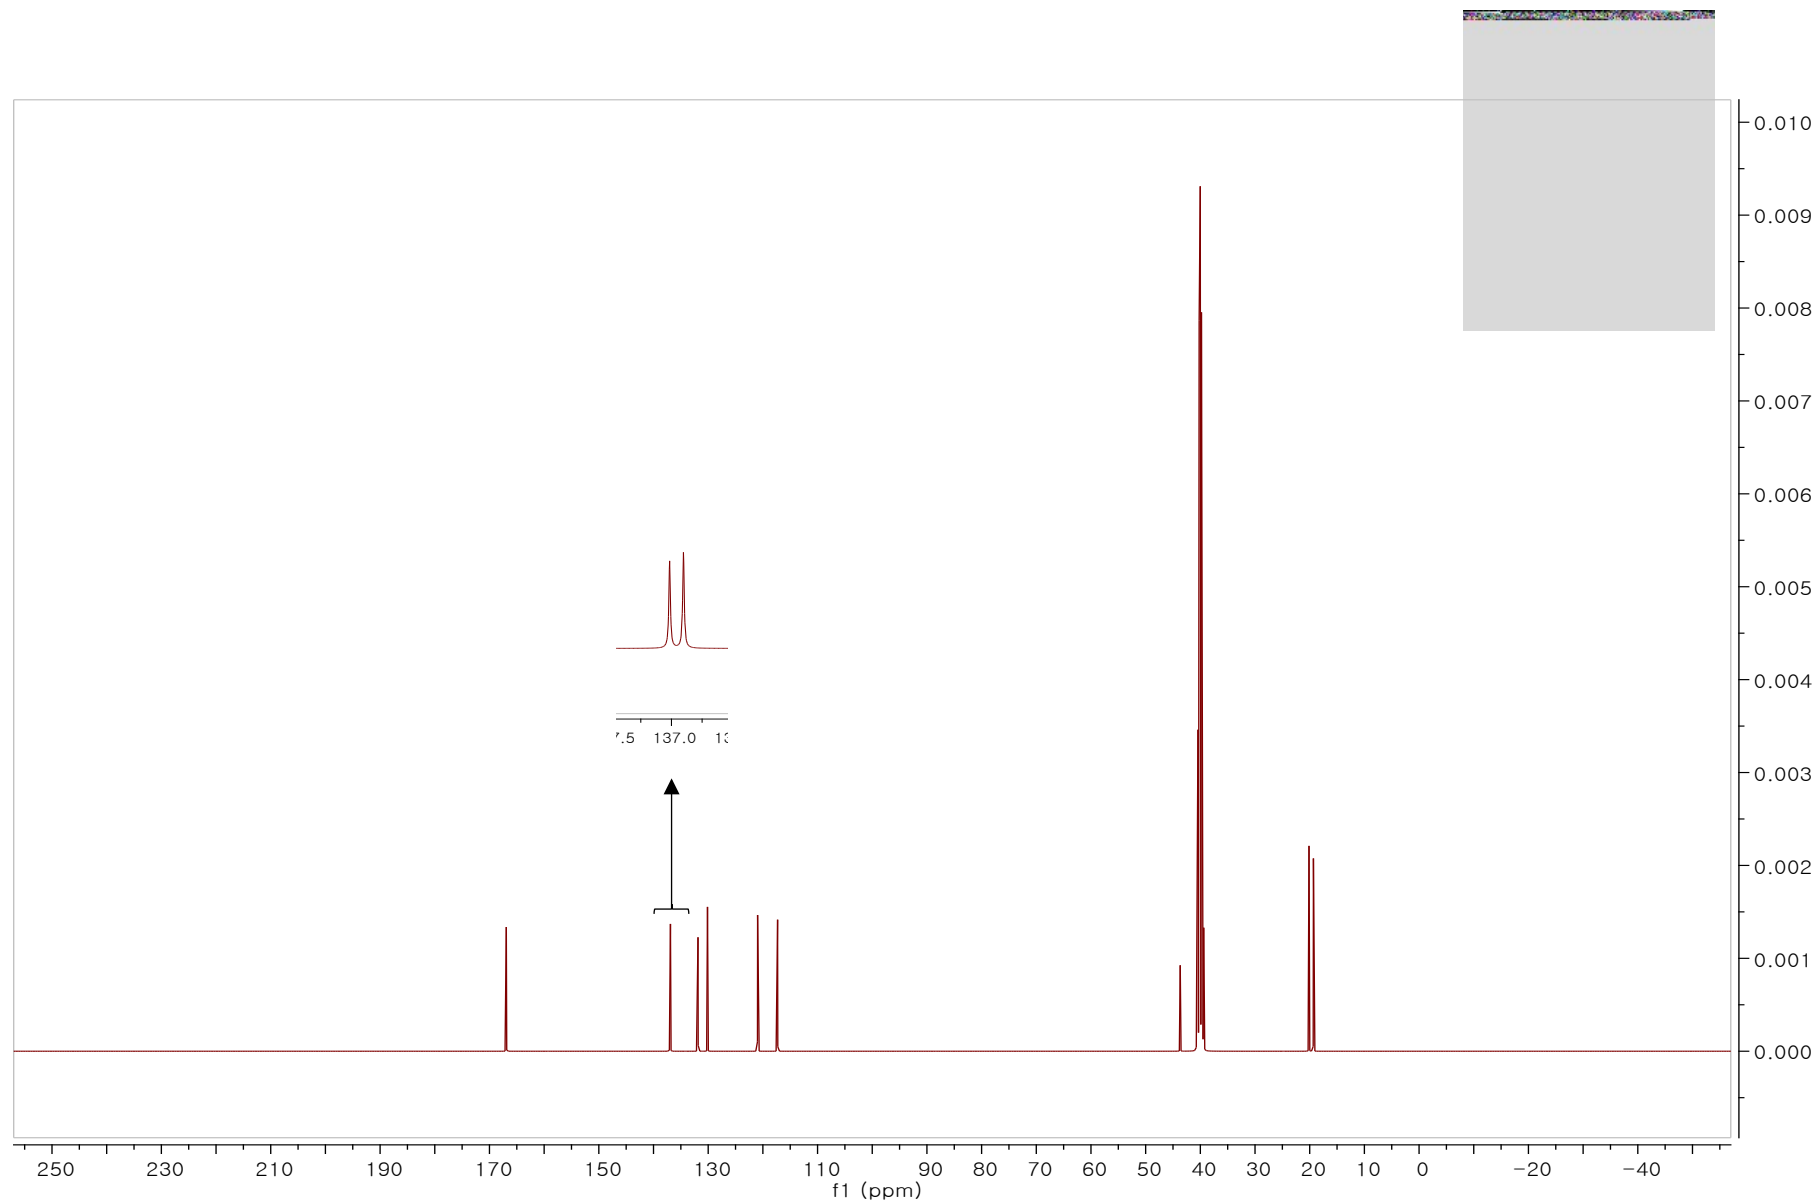

S10.  $^{13}\text{C}$  NMR spectrum of analog 5

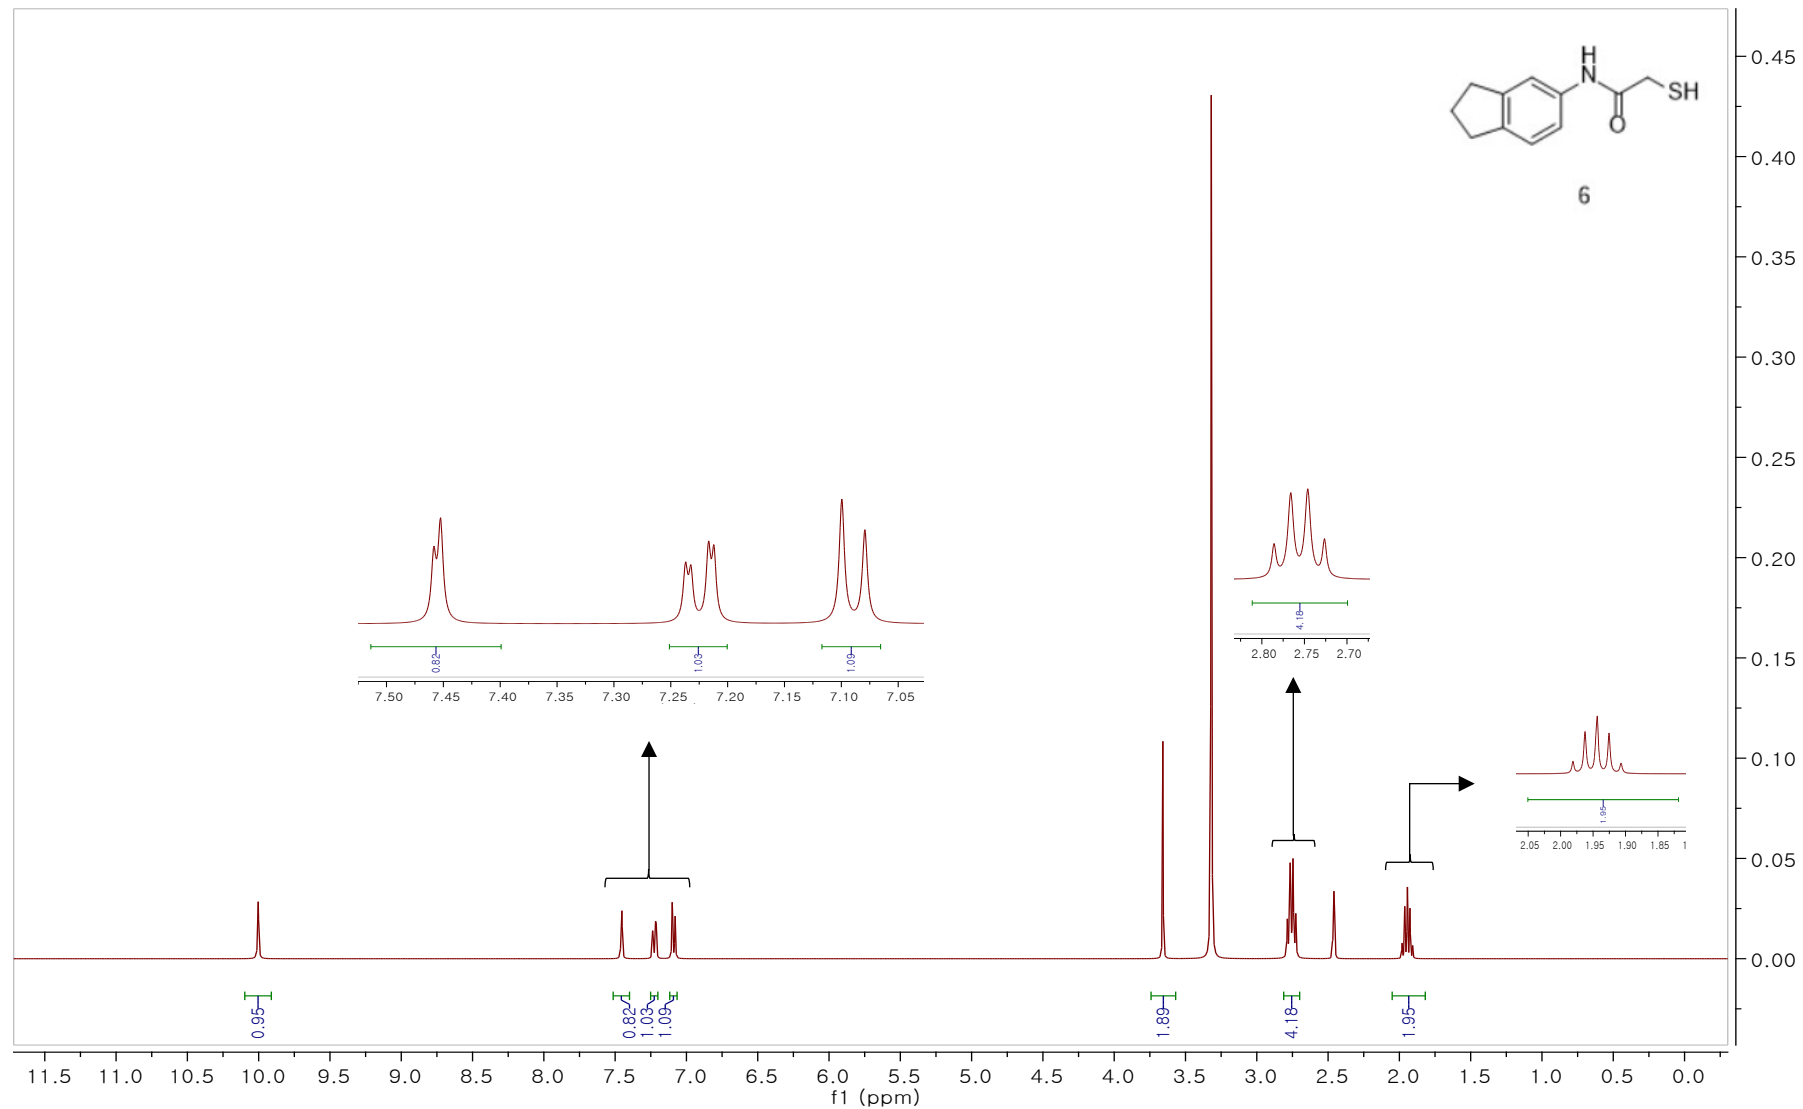

S11. <sup>1</sup>H NMR spectrum of analog **6**

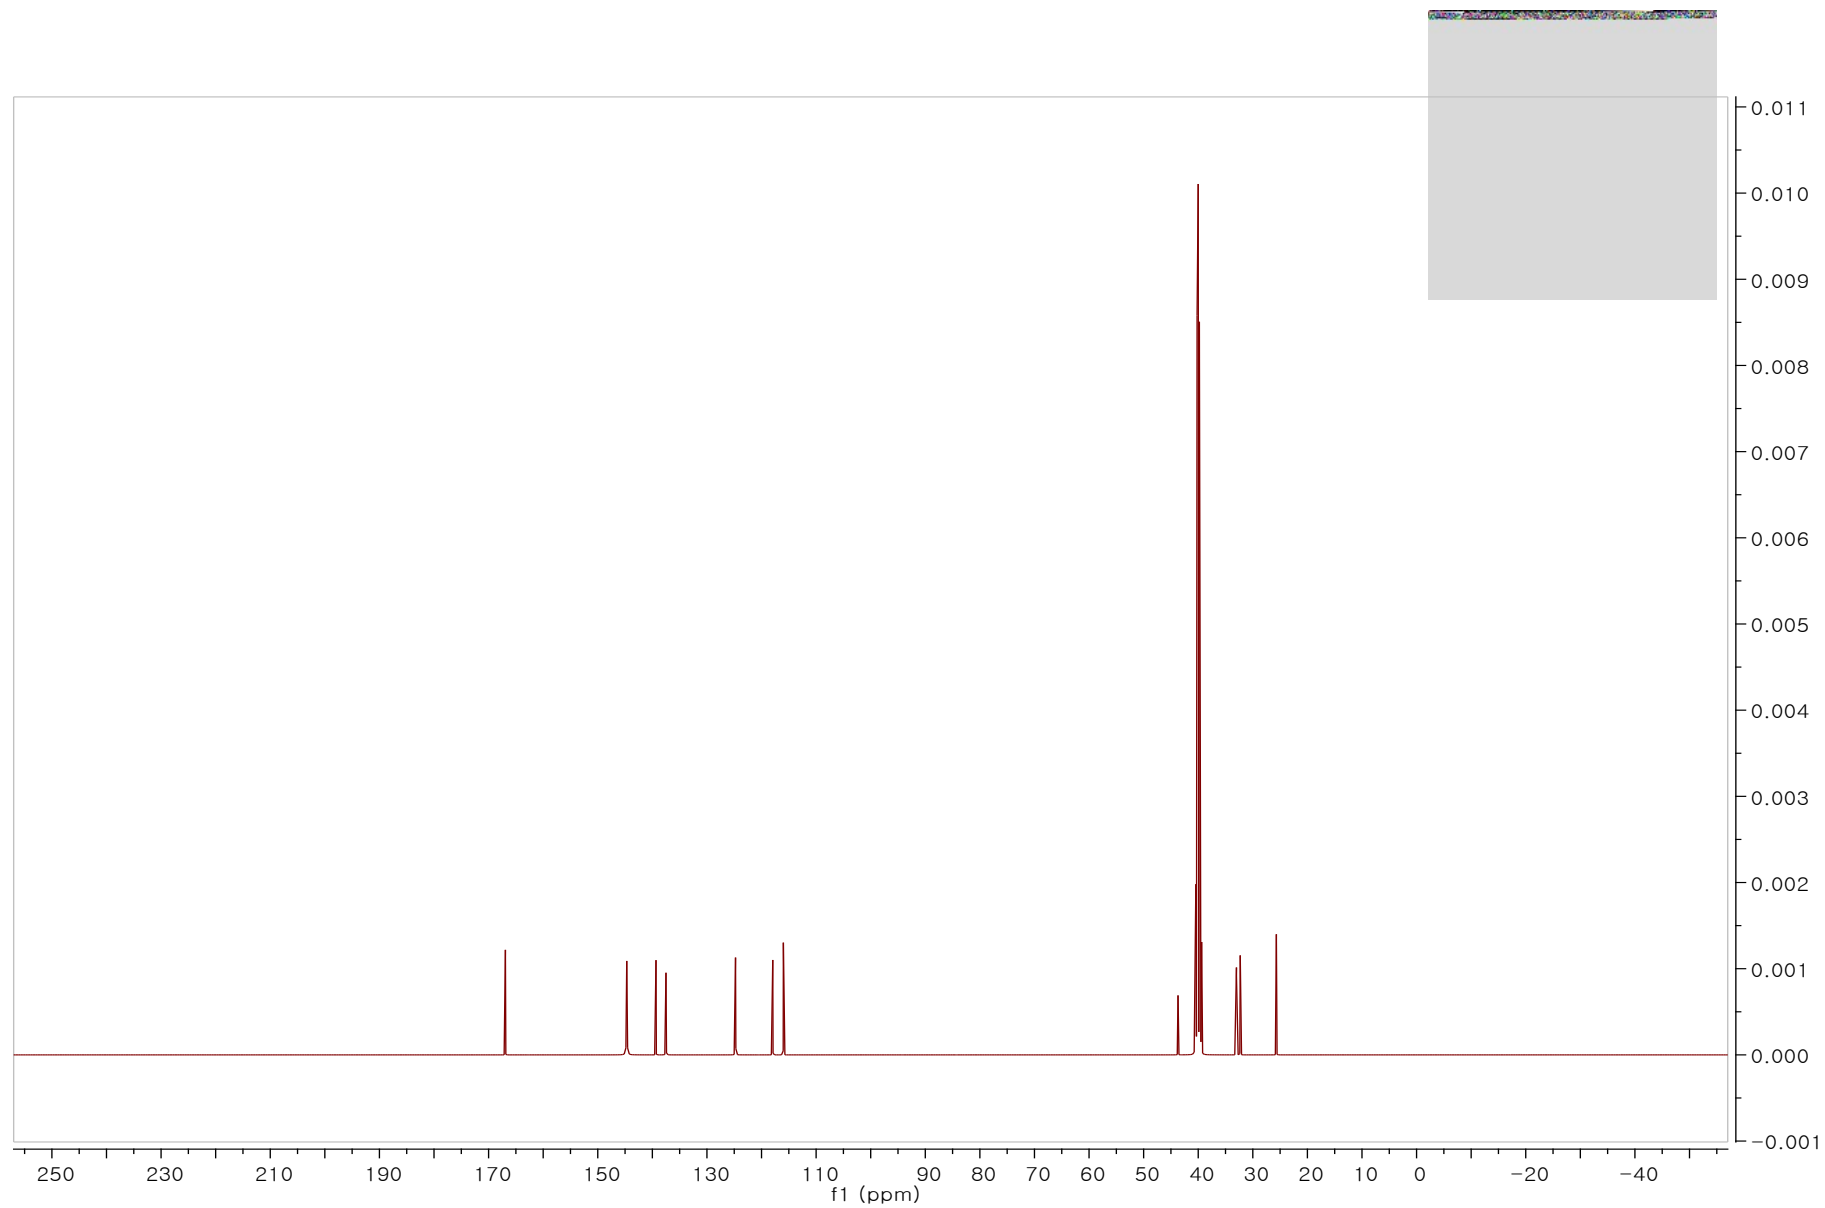

S12.  $^{13}\text{C}$  NMR spectrum of analog **6**



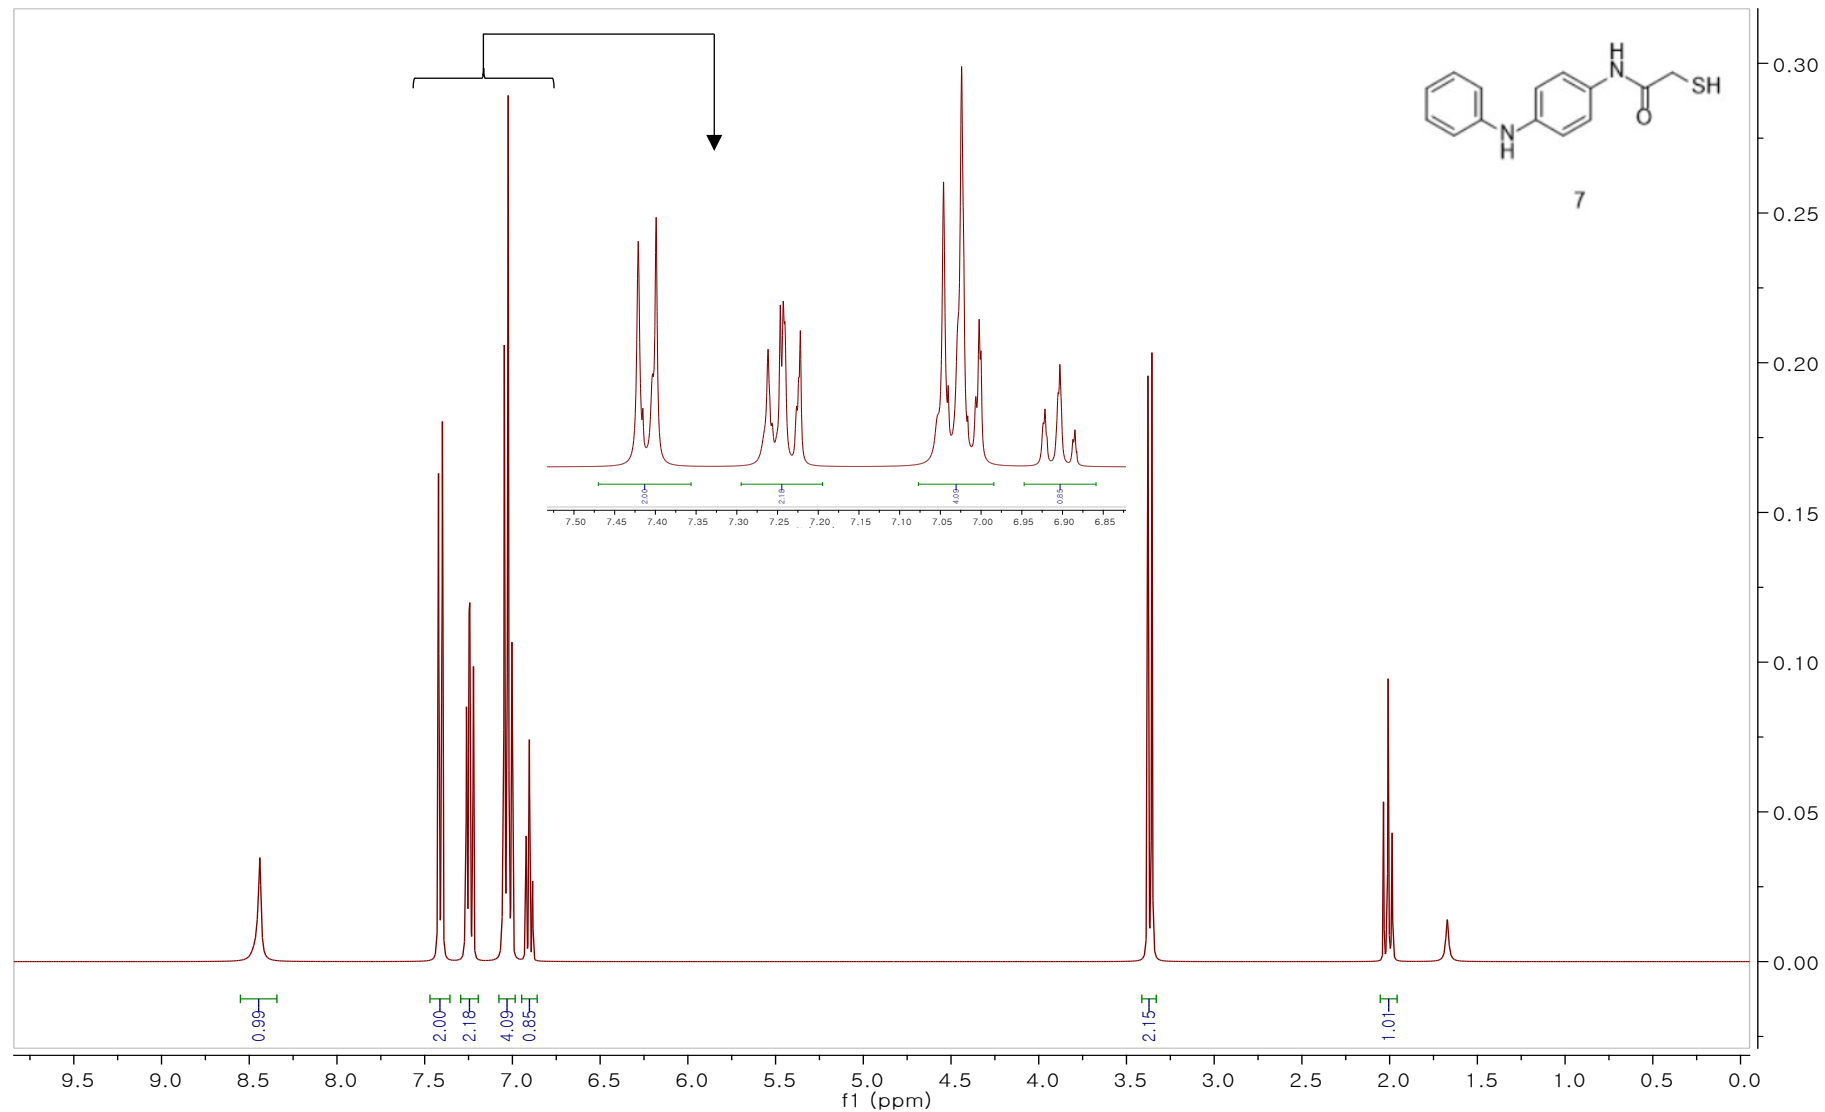

S13. <sup>1</sup>H NMR spectrum of analog 7

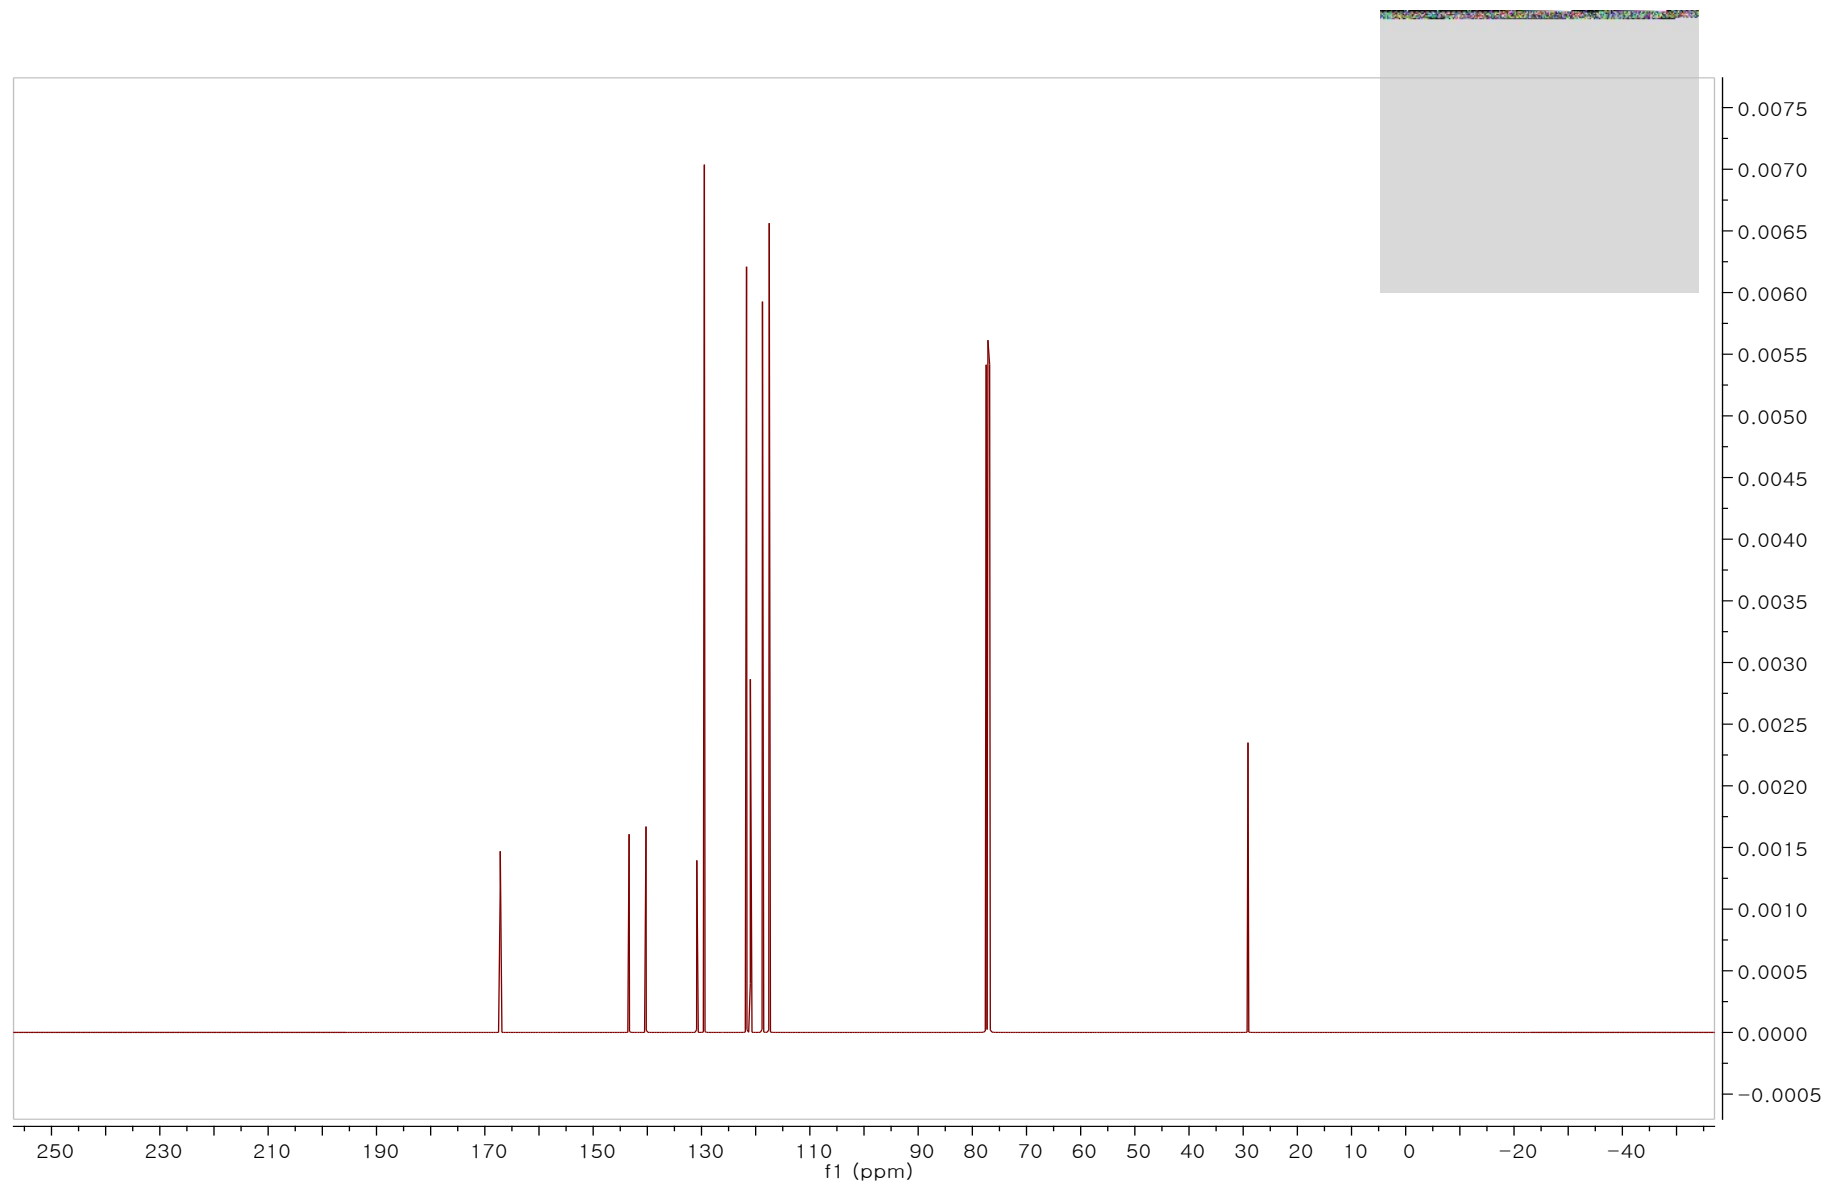

S14.  $^{13}\text{C}$  NMR spectrum of analog 7

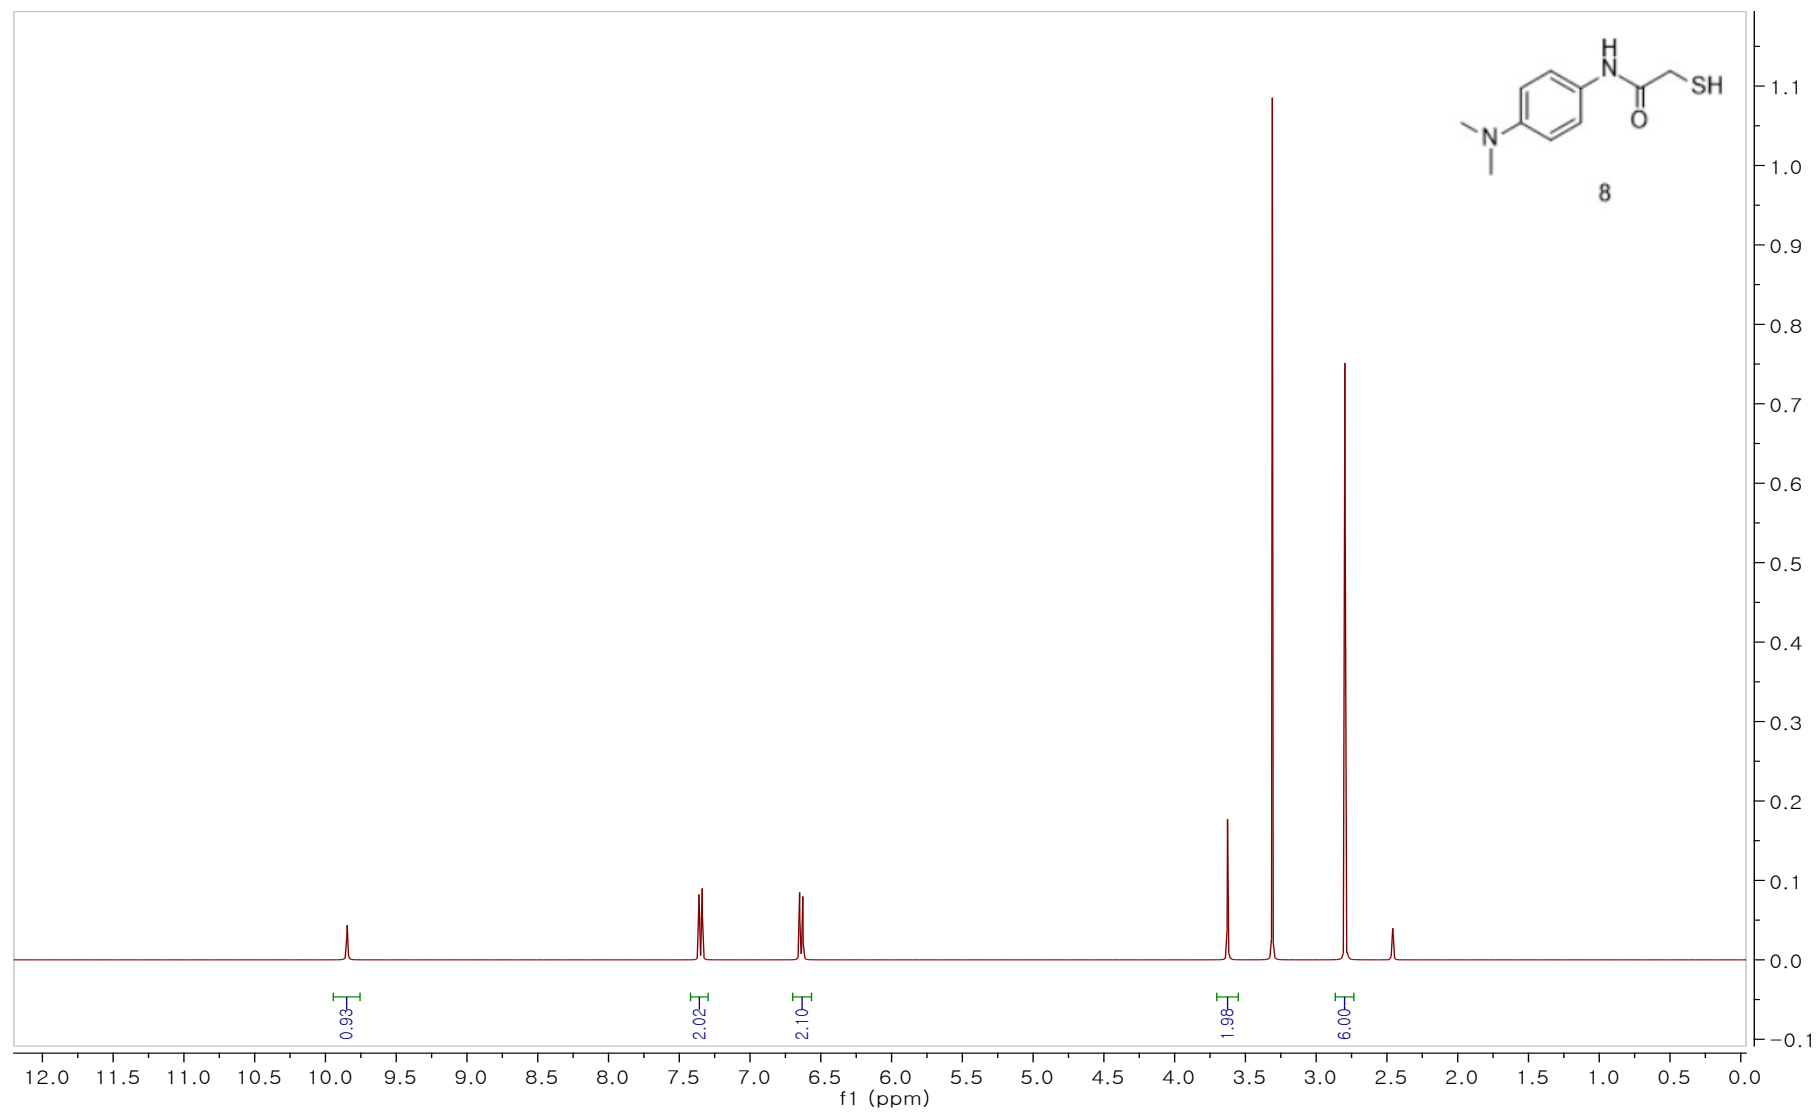

S15.  $^1\text{H}$  NMR spectrum of analog **8**

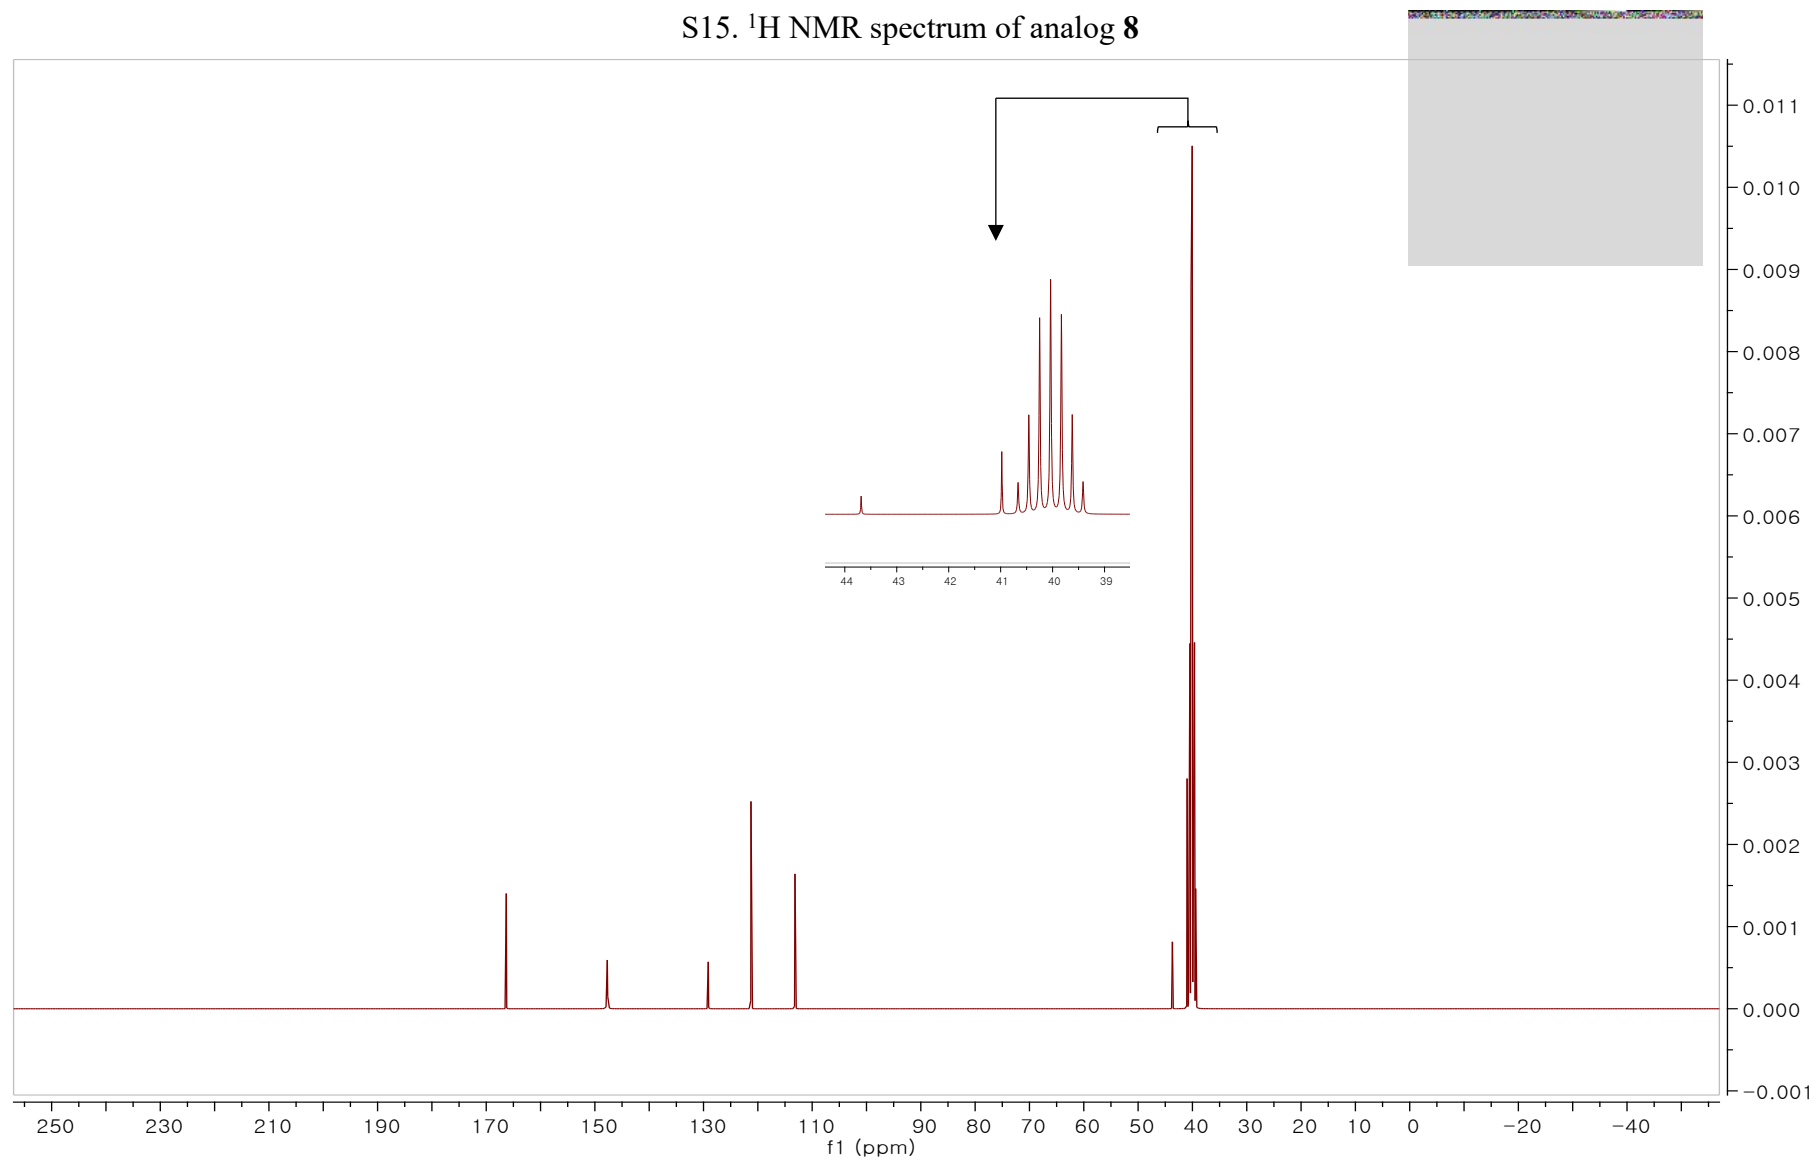

S16.  $^{13}\text{C}$  NMR spectrum of analog **8**

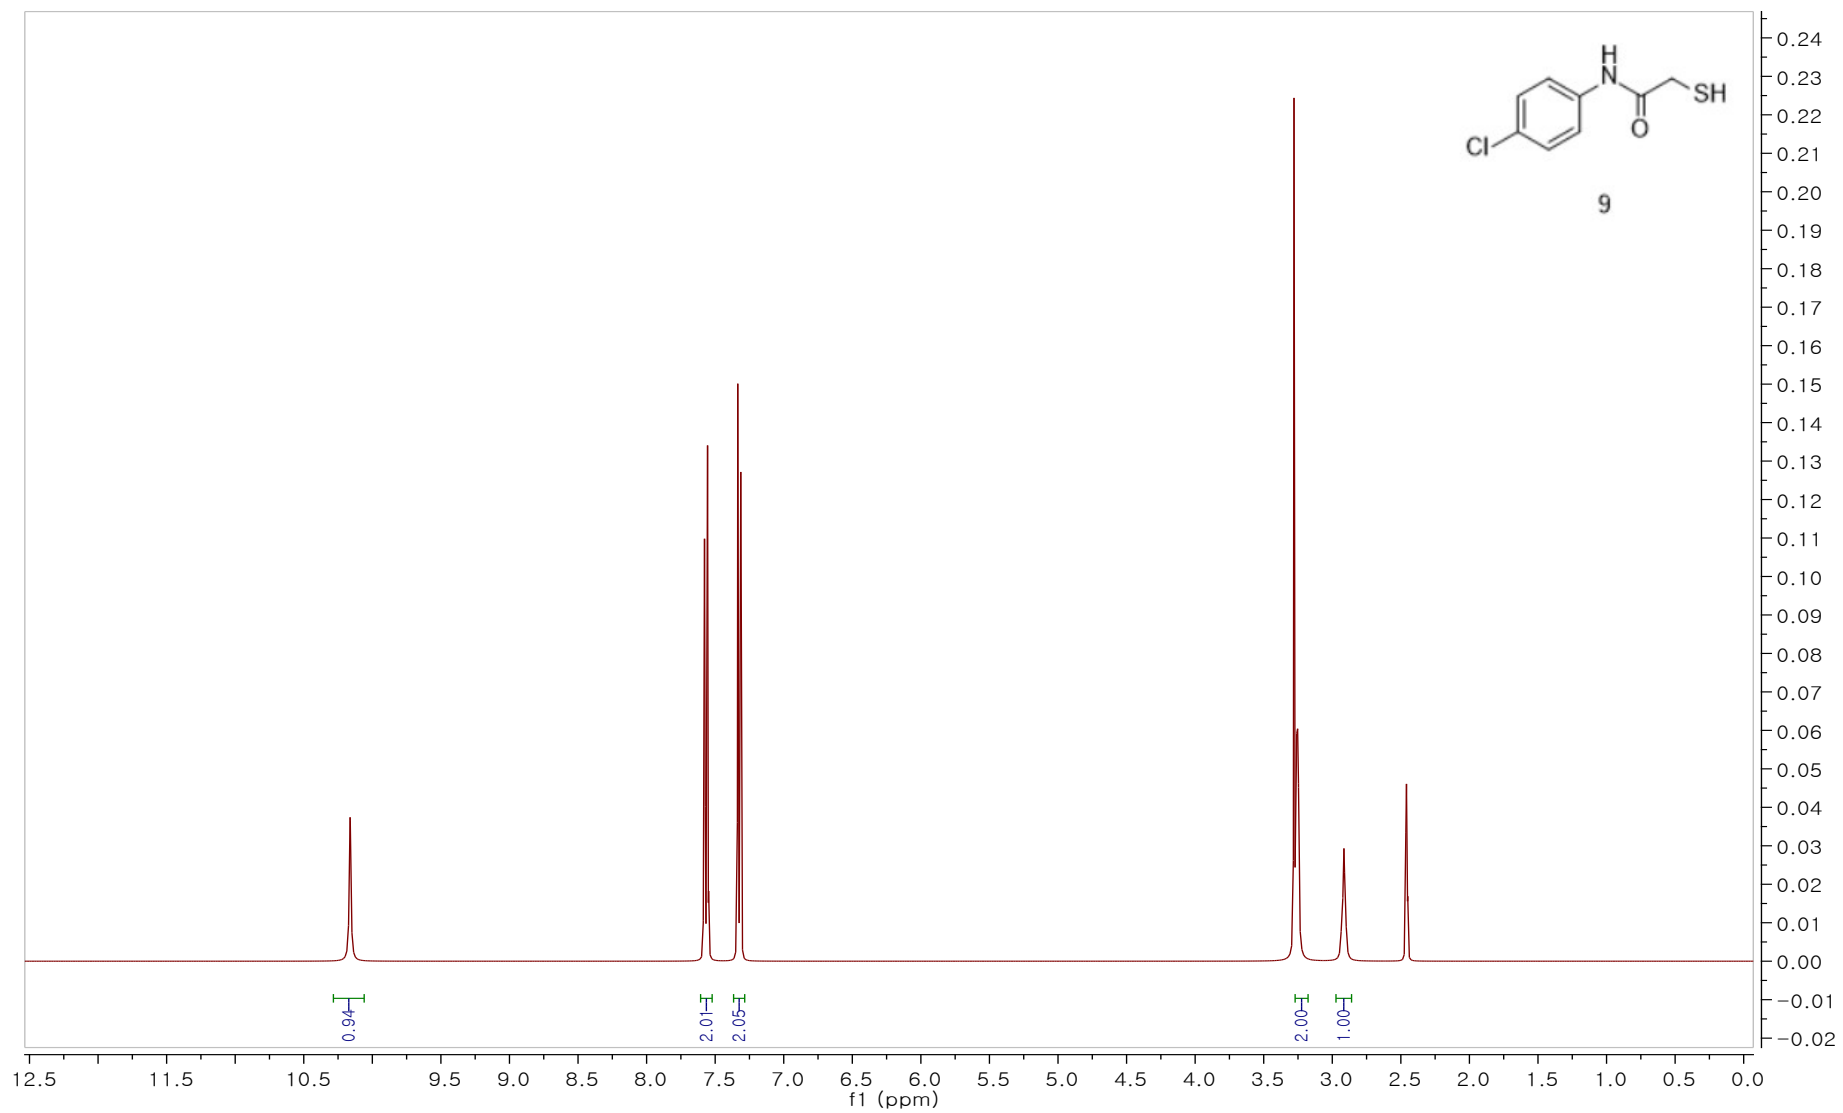

S17.  $^1\text{H}$  NMR spectrum of analog **9**

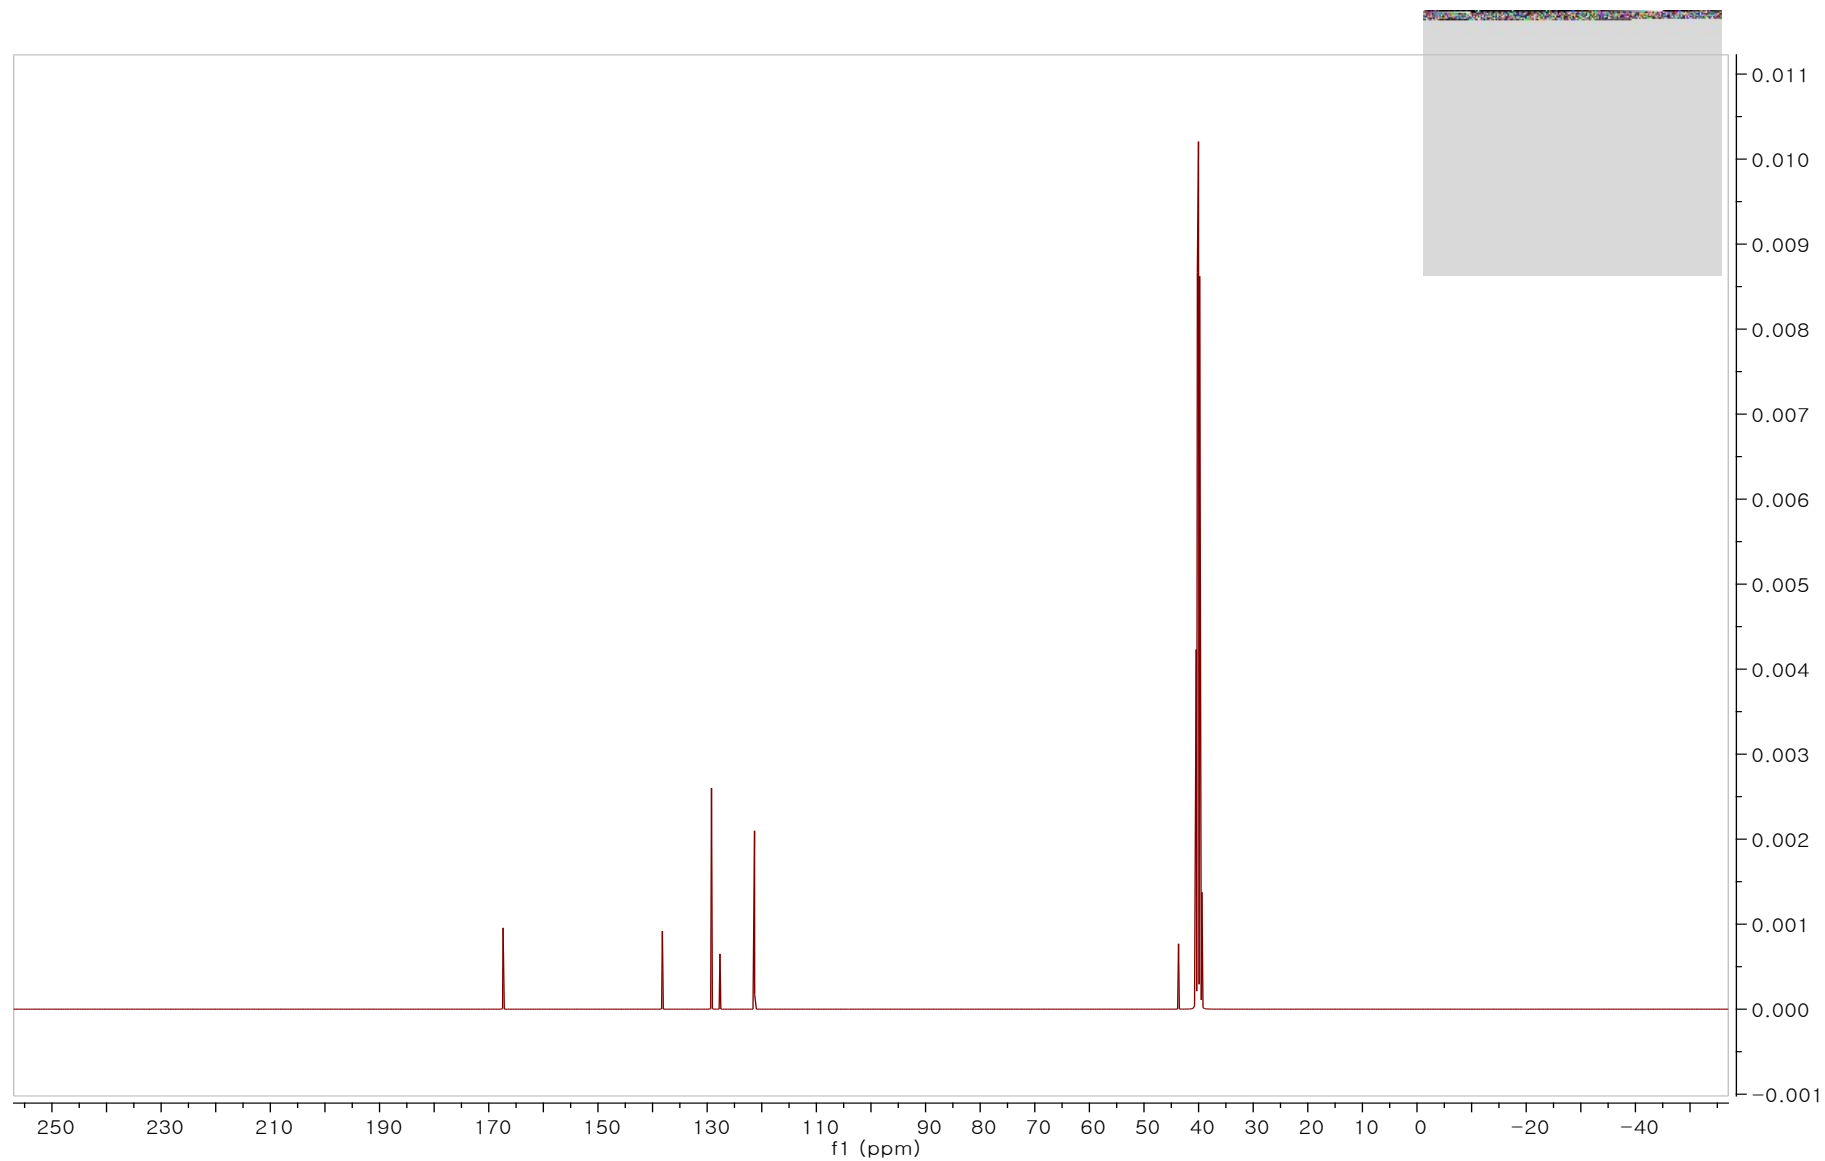

S18.  $^{13}\text{C}$  NMR spectrum of analog 9

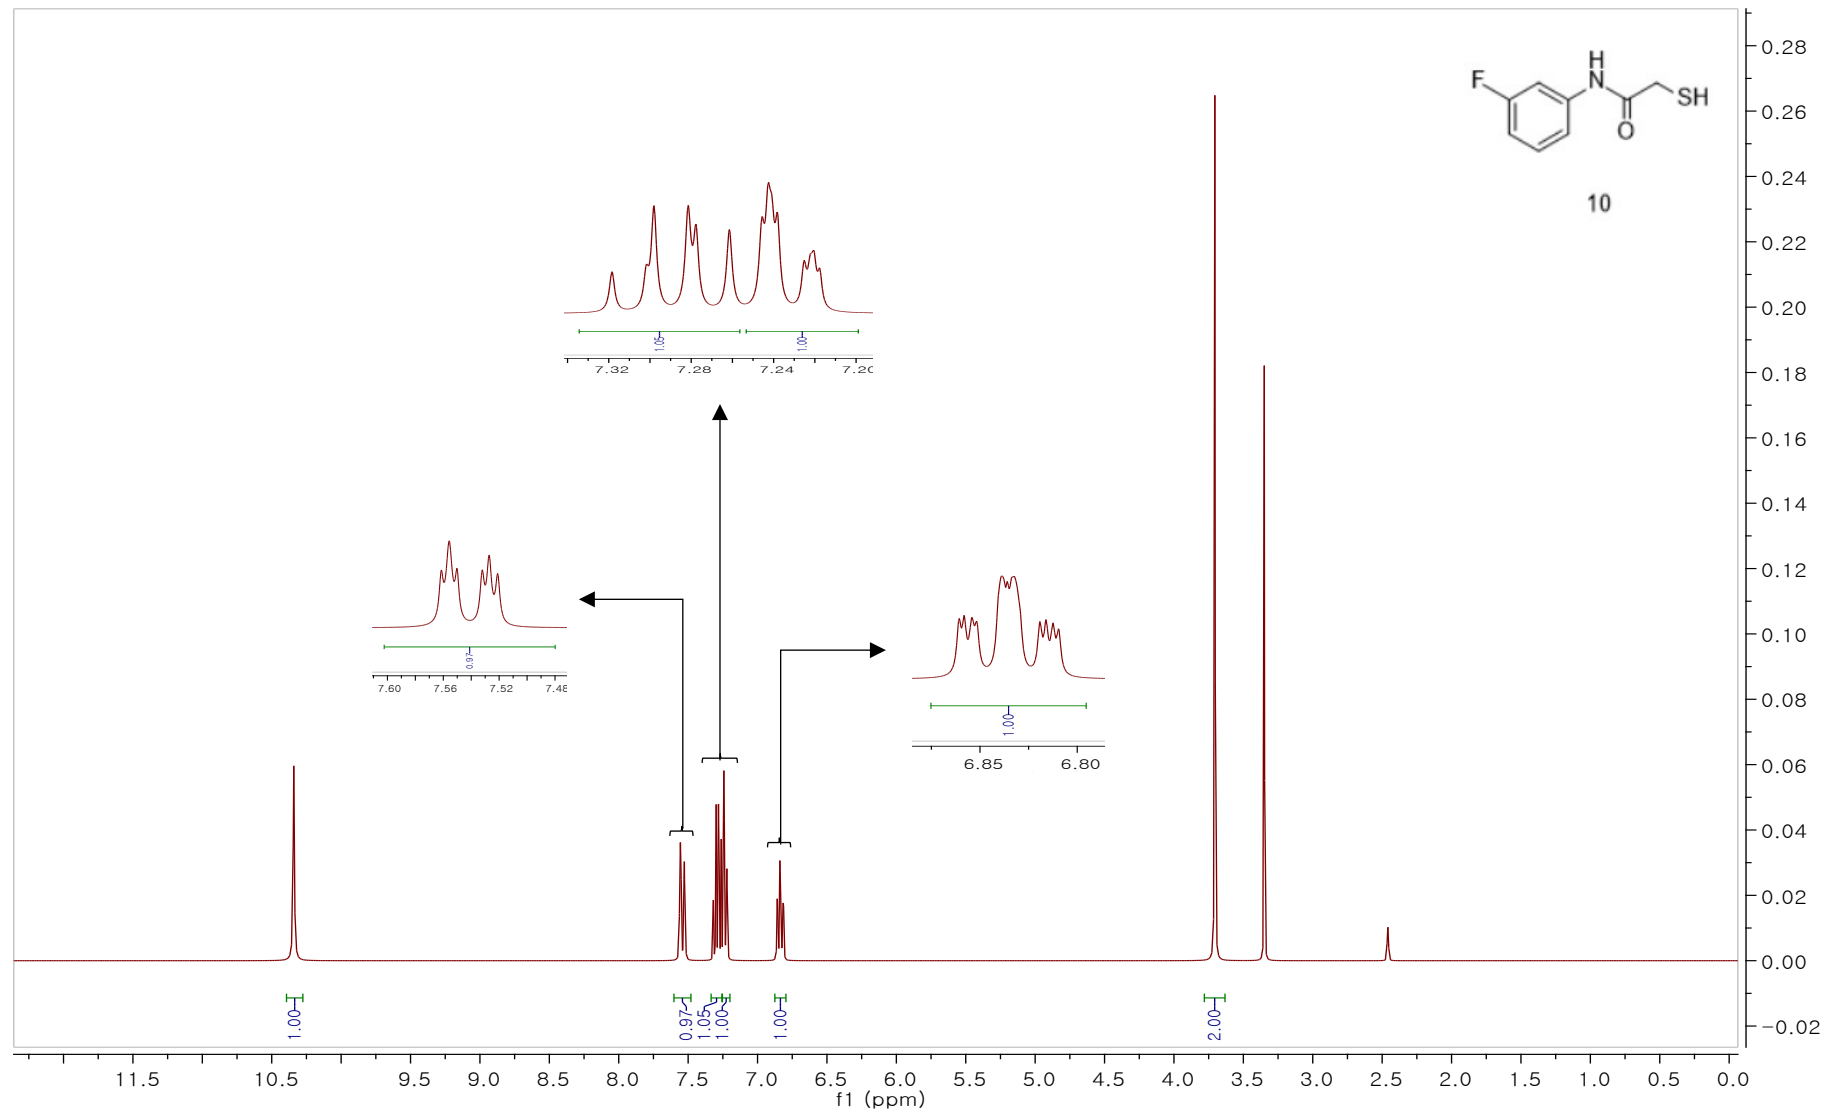



S19. <sup>1</sup>H NMR spectrum of analog **10**

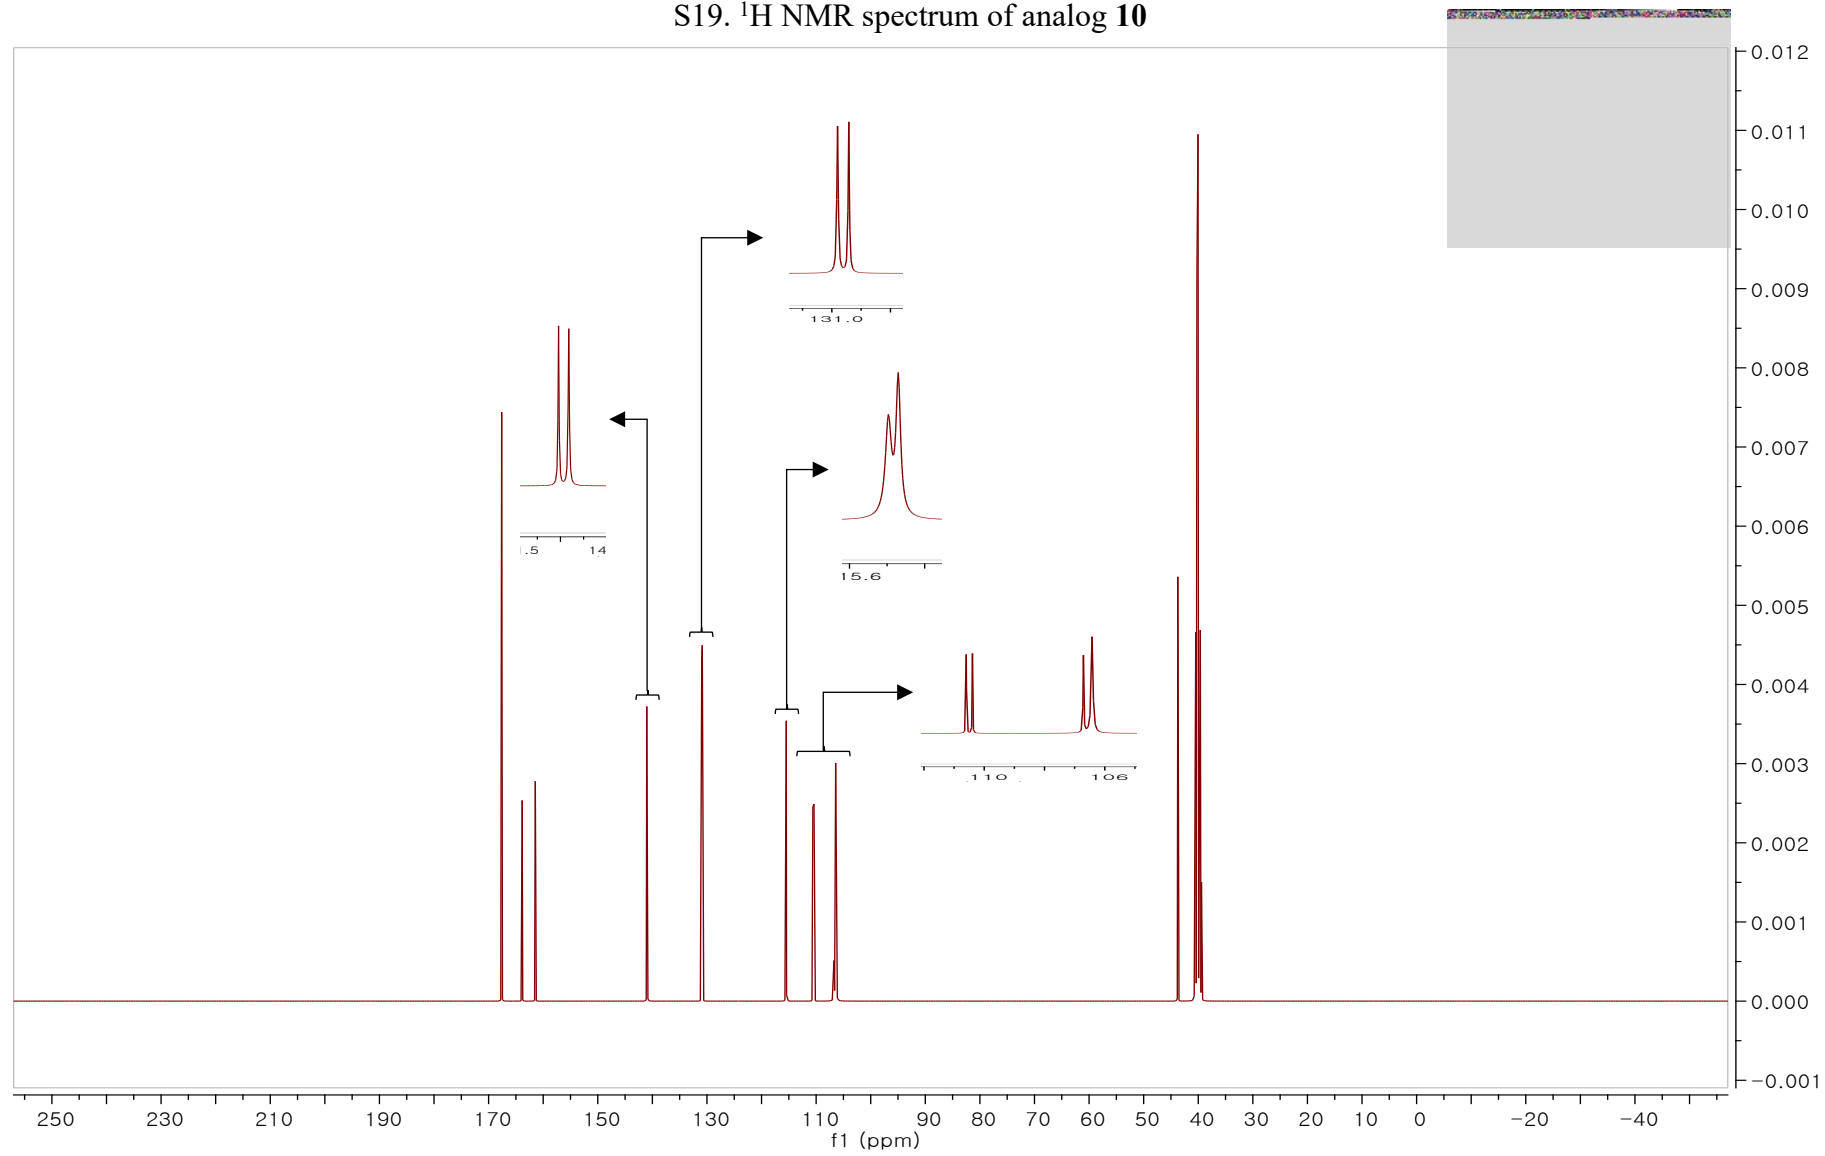

S20. <sup>13</sup>C NMR spectrum of analog **10**

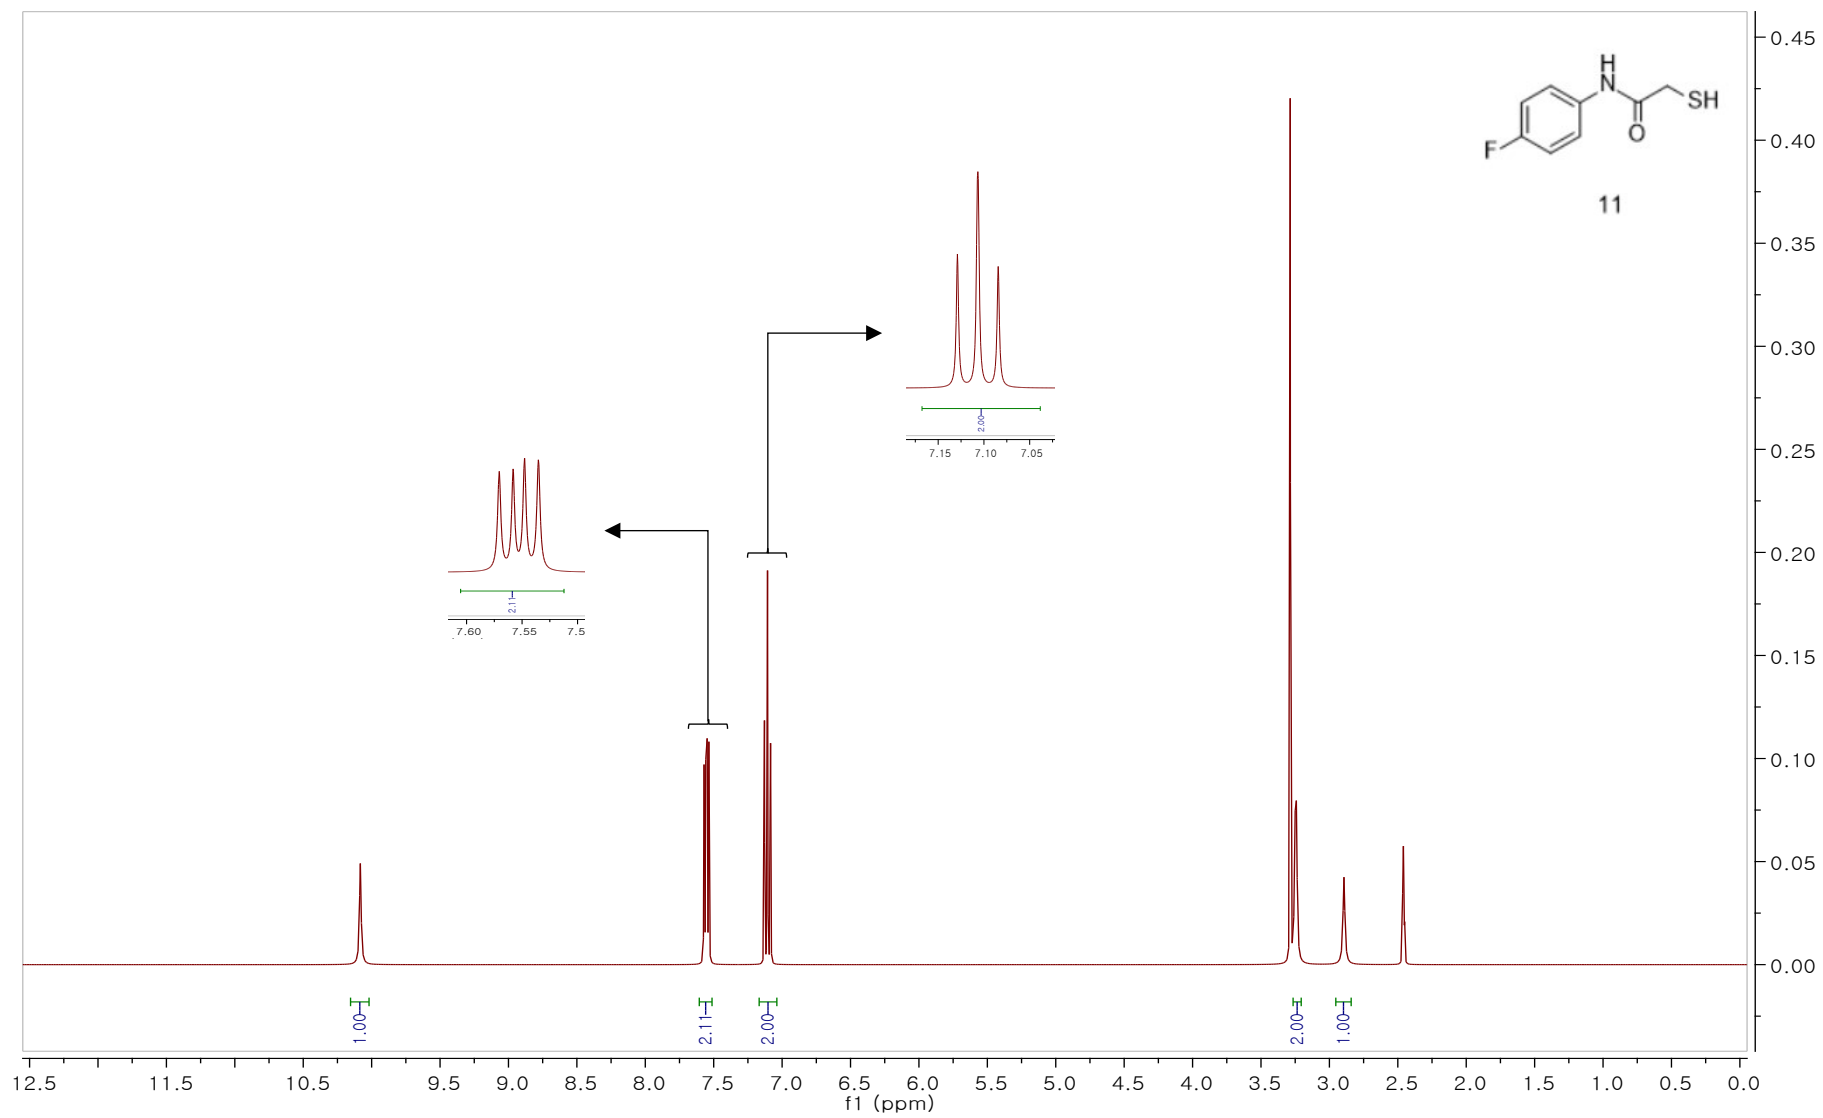

S21.  $^1\text{H}$  NMR spectrum of analog **11**

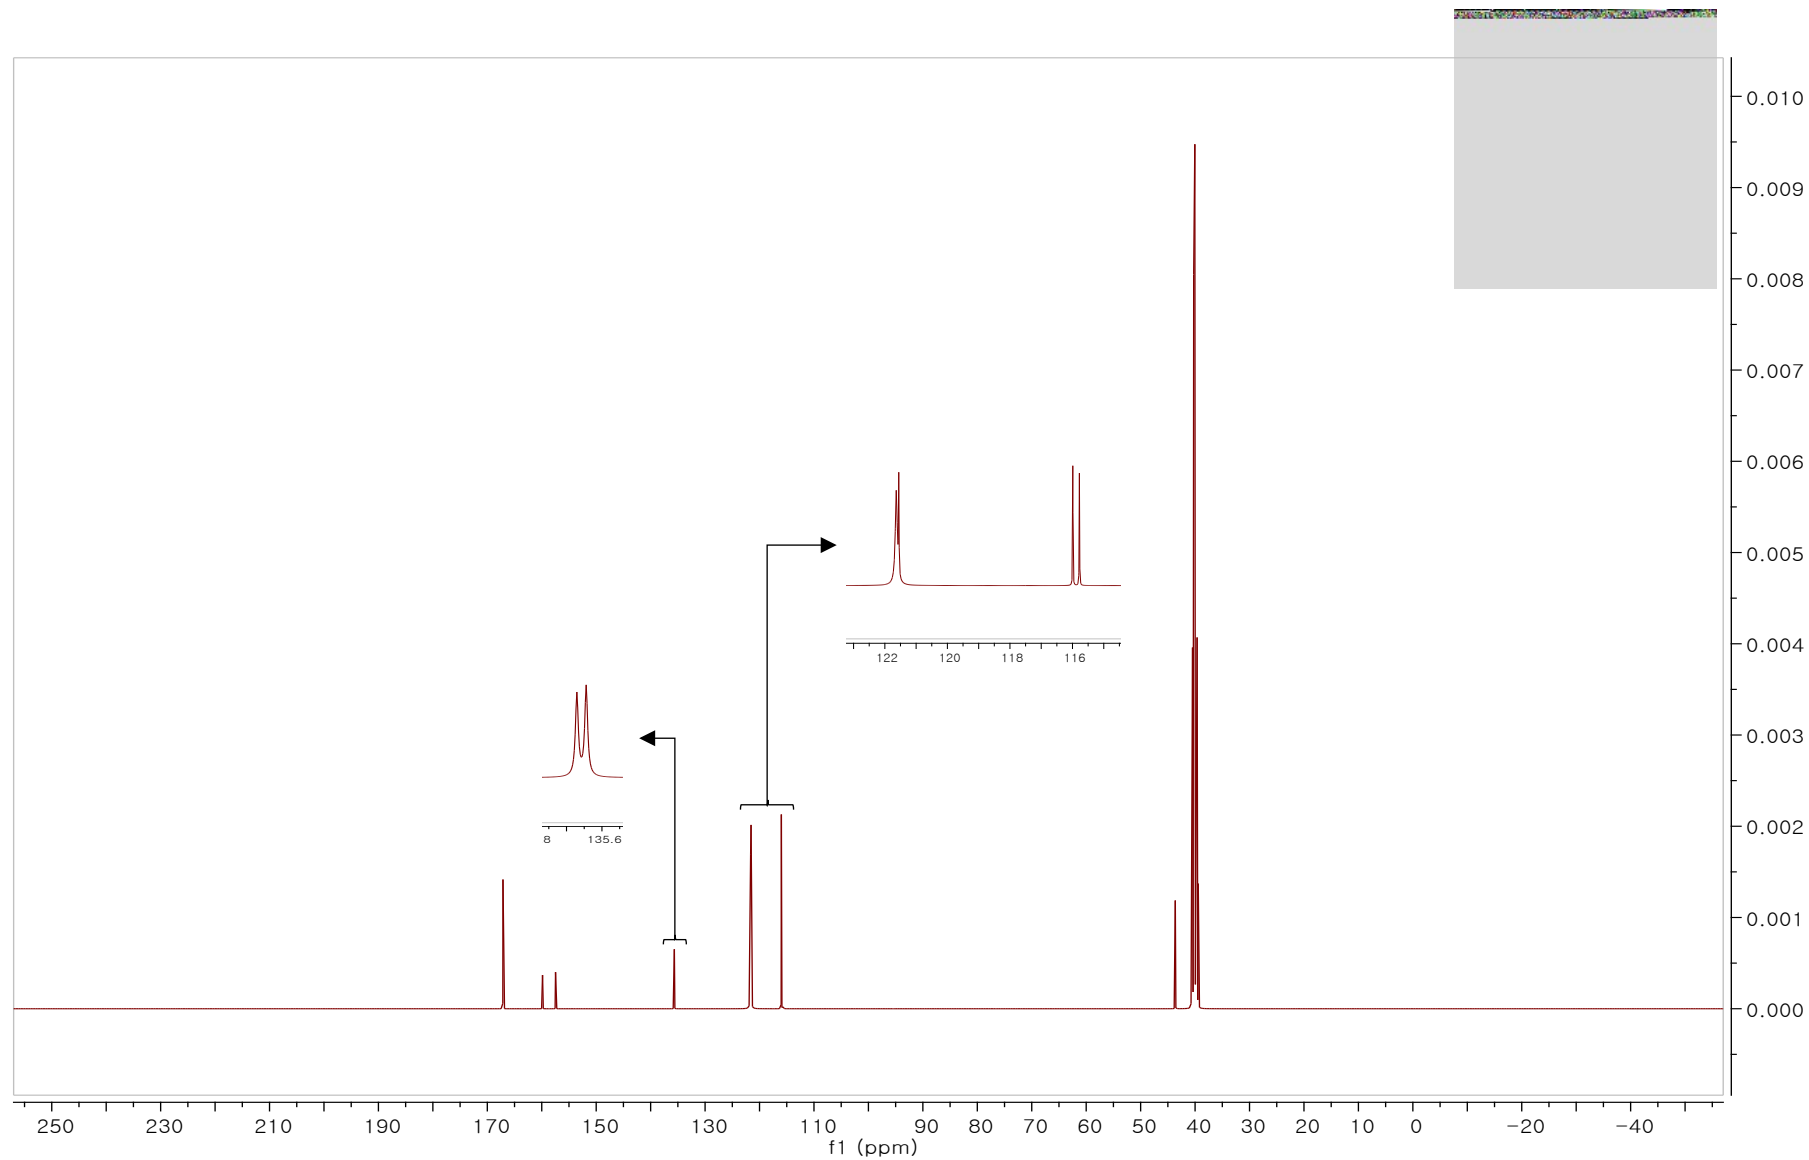

S22.  $^{13}\text{C}$  NMR spectrum of analog 11

S23. Raw data used for IC<sub>50</sub> values in the presence of L-tyrosine

**Substrate: L-Tyrosine**

| Compd. | Conc.( $\mu$ M) | OD1    | OD2    | OD3    | color control | Inhibition (%) |        |        | IC <sub>50</sub> (n=3) | IC <sub>50</sub> average | SEM   |
|--------|-----------------|--------|--------|--------|---------------|----------------|--------|--------|------------------------|--------------------------|-------|
| 1      | 0.25            | 0.169  | 0.1707 | 0.1736 | 0.0363        | 5.06           | 3.84   | 1.76   | 1.94                   | 1.99                     | 0.03  |
|        | 1               | 0.1116 | 0.1181 | 0.1267 | 0.0377        | 47.13          | 42.48  | 36.32  | 1.98                   |                          |       |
|        | 4               | 0.0469 | 0.0437 | 0.0451 | 0.0363        | 92.42          | 94.71  | 93.70  | 2.05                   |                          |       |
| 2      | 1               | 0.1316 | 0.1334 | 0.1315 | 0.039         | 33.75          | 32.46  | 33.82  | 1.07                   | 1.44                     | 0.23  |
|        | 2               | 0.1034 | 0.103  | 0.1097 | 0.0369        | 52.42          | 52.71  | 47.91  | 1.56                   |                          |       |
|        | 4               | 0.0594 | 0.0705 | 0.0748 | 0.0368        | 83.83          | 75.89  | 72.81  | 1.68                   |                          |       |
| 3      | 4               | 0.1551 | 0.1438 | 0.1409 | 0.0368        | -5.91          | 4.21   | 6.80   | 64.53                  | 55.21                    | 4.71  |
|        | 20              | 0.1071 | 0.1094 | 0.109  | 0.0367        | 36.97          | 34.91  | 35.27  | 51.70                  |                          |       |
|        | 100             | 0.0691 | 0.0523 | 0.0497 | 0.0371        | 71.35          | 86.39  | 88.72  | 49.40                  |                          |       |
| 4      | 4               | 0.1439 | 0.1496 | 0.1472 | 0.0358        | 3.22           | -1.88  | 0.27   | 38.09                  | 38.48                    | 0.20  |
|        | 20              | 0.1297 | 0.1259 | 0.1277 | 0.0672        | 44.05          | 47.45  | 45.84  | 38.68                  |                          |       |
|        | 100             | 0.0795 | 0.0797 | 0.0802 | 0.094         | 112.98         | 112.80 | 112.35 | 38.67                  |                          |       |
| 5      | 4               | 0.1668 | 0.1803 | 0.1808 | 0.0382        | 11.62          | 2.34   | 1.99   |                        | >400                     |       |
|        | 100             | 0.1754 | 0.2009 | 0.1929 | 0.0678        | 26.05          | 8.52   | 14.02  |                        |                          |       |
| 6      | 4               | 0.1467 | 0.1468 | 0.1394 | 0.0394        | 3.94           | 3.85   | 10.47  | 45.25                  | 44.20                    | 1.69  |
|        | 20              | 0.1258 | 0.1273 | 0.1239 | 0.0487        | 30.98          | 29.63  | 32.68  | 45.91                  |                          |       |
|        | 100             | 0.0949 | 0.0955 | 0.0914 | 0.0987        | 103.40         | 102.86 | 106.54 | 41.44                  |                          |       |
| 7      | 0.25            | 0.1736 | 0.1747 | 0.1748 | 0.0358        | 1.41           | 0.62   | 0.55   | 2.33                   | 1.91                     | 0.01  |
|        | 1               | 0.1066 | 0.1117 | 0.105  | 0.0371        | 50.27          | 46.63  | 51.42  | 2.37                   |                          |       |
|        | 4               | 0.045  | 0.0441 | 0.0456 | 0.04          | 96.42          | 97.07  | 95.99  | 2.33                   |                          |       |
| 8      | 4               | 0.1793 | 0.1901 | 0.1851 | 0.0369        | 2.13           | -5.29  | -1.86  | 96.36                  | 145.64                   | 16.93 |
|        | 100             | 0.1126 | 0.1384 | 0.1421 | 0.0426        | 51.89          | 34.16  | 31.62  | 138.56                 |                          |       |

|                   |      |        |        |        |        |       |       |       |        |       |      |
|-------------------|------|--------|--------|--------|--------|-------|-------|-------|--------|-------|------|
|                   |      |        |        |        |        |       |       |       | 152.71 |       |      |
| <b>9</b>          | 1    | 0.1205 | 0.1233 | 0.1185 | 0.0367 | 40.04 | 38.04 | 41.47 | 1.59   | 0.95  | 0.06 |
|                   | 2    | 0.0961 | 0.1003 | 0.0945 | 0.0359 | 56.93 | 53.92 | 58.07 | 1.73   |       |      |
|                   | 4    | 0.0508 | 0.0523 | 0.049  | 0.0369 | 90.05 | 88.98 | 91.34 | 1.51   |       |      |
| <b>10</b>         | 5    | 0.1657 | 0.164  | 0.1627 | 0.0367 | 7.70  | 8.92  | 9.85  | 18.67  | 17.66 | 0.66 |
|                   | 10   | 0.1357 | 0.1338 | 0.1391 | 0.0361 | 28.74 | 30.10 | 26.31 | 16.67  |       |      |
|                   | 20   | 0.1036 | 0.0927 | 0.1023 | 0.0373 | 52.56 | 60.36 | 53.49 | 18.65  |       |      |
| <b>11</b>         | 4    | 0.1423 | 0.1501 | 0.1484 | 0.0361 | 4.92  | -2.06 | -0.54 | 63.75  | 70.28 | 5.55 |
|                   | 20   | 0.1255 | 0.1278 | 0.1262 | 0.0371 | 20.86 | 18.80 | 20.23 | 81.32  |       |      |
|                   | 100  | 0.0655 | 0.0827 | 0.0663 | 0.0384 | 75.74 | 60.34 | 75.02 | 65.77  |       |      |
| <b>Kojic acid</b> | 6.25 | 0.0714 | 0.0731 | 0.0771 | 0.0364 | 19.04 | 15.11 | 5.86  | 23.64  | 24.26 | 0.31 |
|                   | 12.5 | 0.0675 | 0.0684 | 0.0648 | 0.0374 | 30.38 | 28.30 | 36.62 | 24.48  |       |      |
|                   | 25   | 0.0517 | 0.0525 | 0.0537 | 0.0367 | 65.30 | 63.45 | 60.68 | 24.65  |       |      |
|                   | 50   | 0.0445 | 0.0435 | 0.0426 | 0.0378 | 84.04 | 86.35 | 88.43 |        |       |      |

Substrate: L-Tyrosine

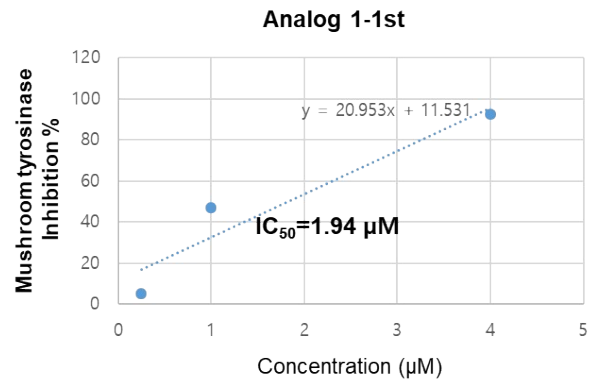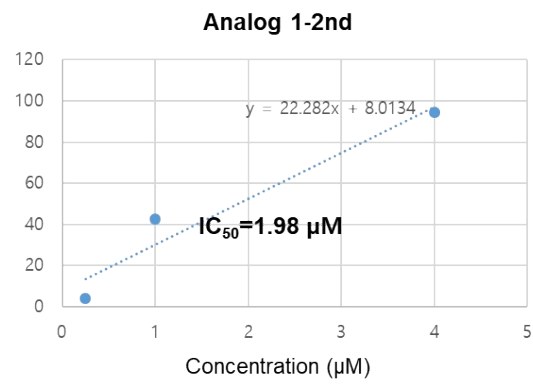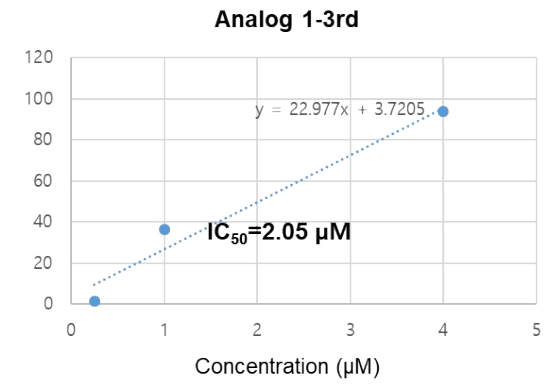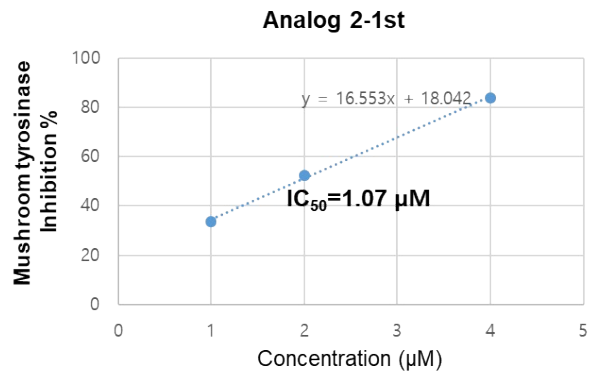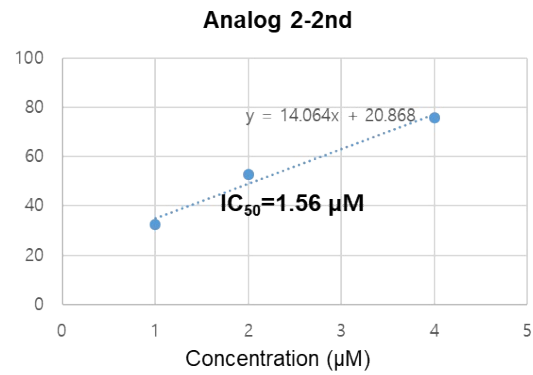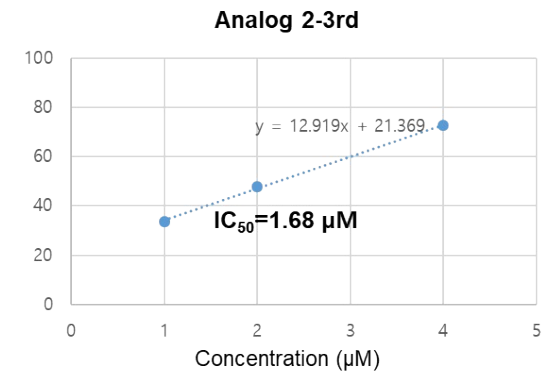

S24. Graphs used to calculate  $\text{IC}_{50}$  values for **1** and **2** in the presence of L-tyrosine

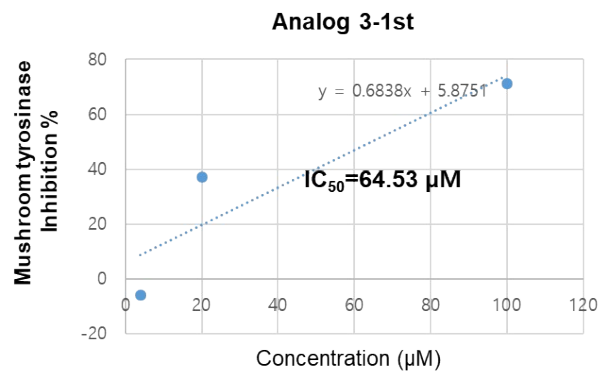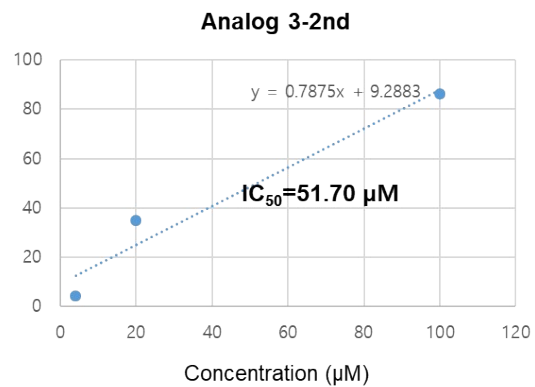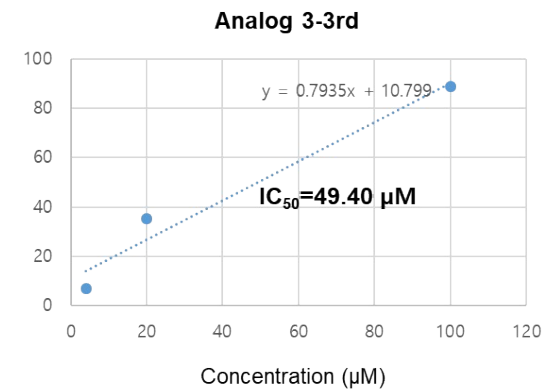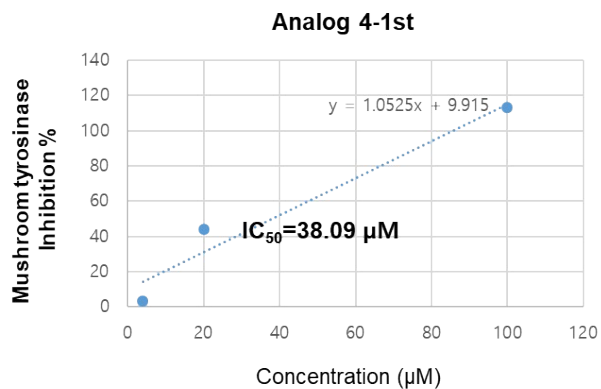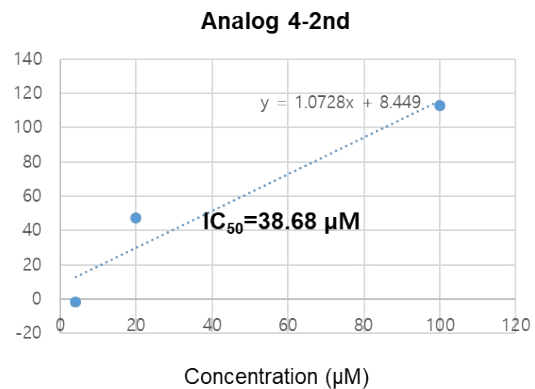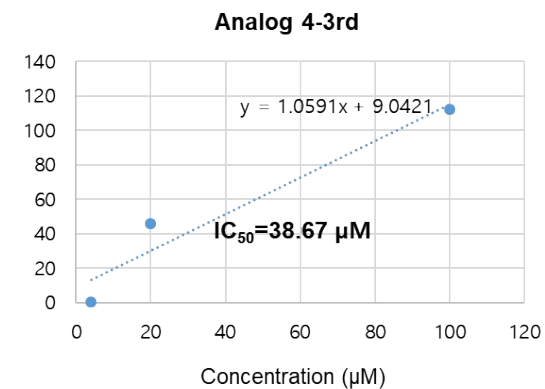

S25. Graphs used to calculate  $\text{IC}_{50}$  values for **3** and **4** in the presence of L-tyrosine



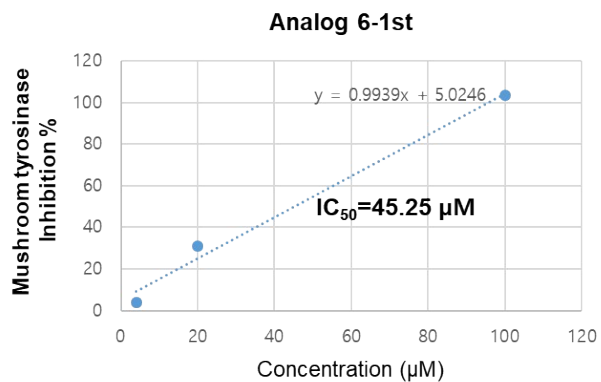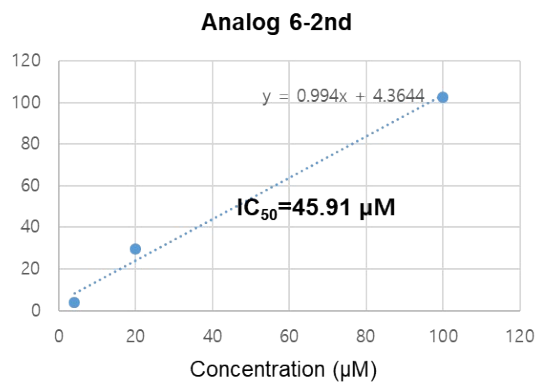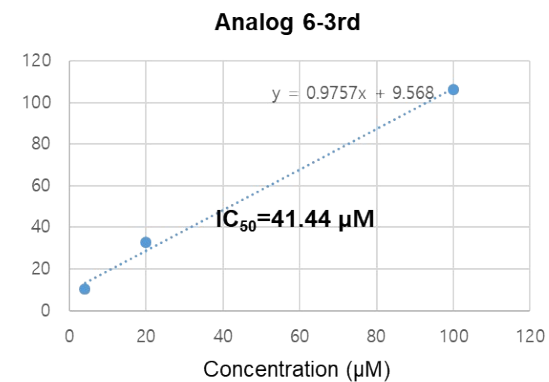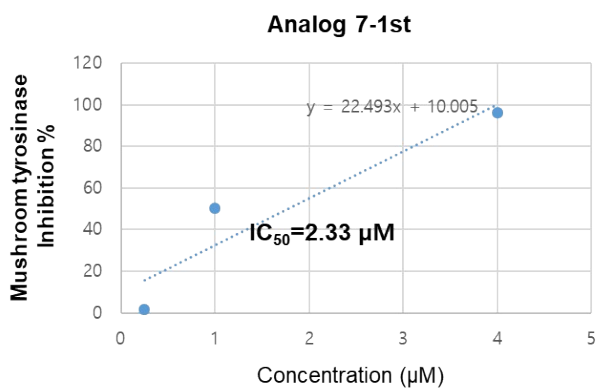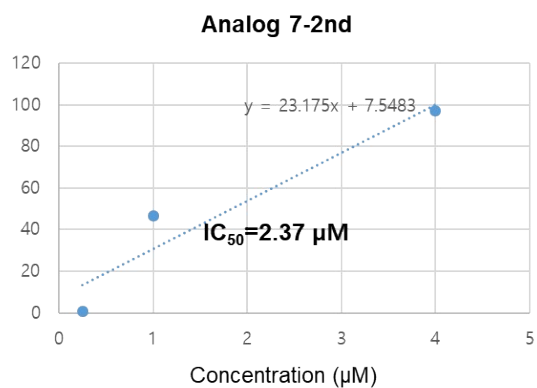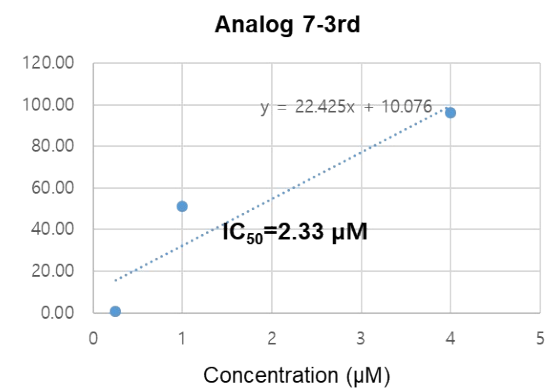

S26. Graphs used to calculate  $\text{IC}_{50}$  values for **6** and **7** in the presence of L-tyrosine

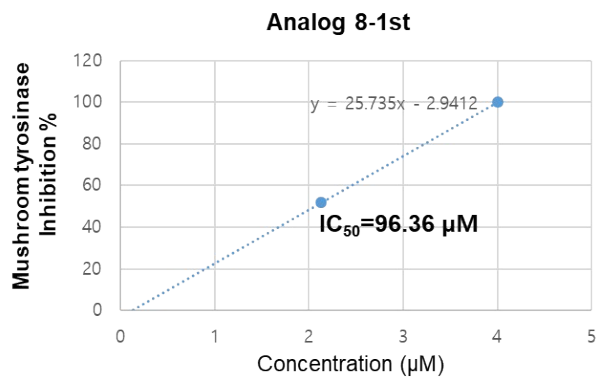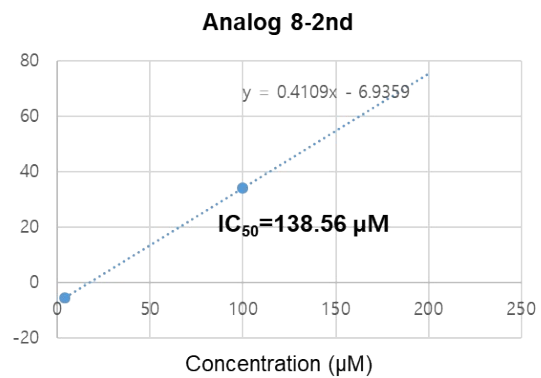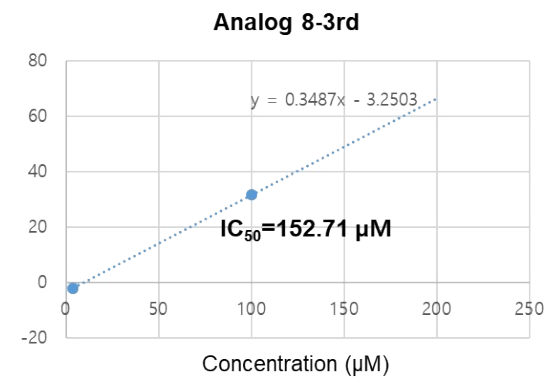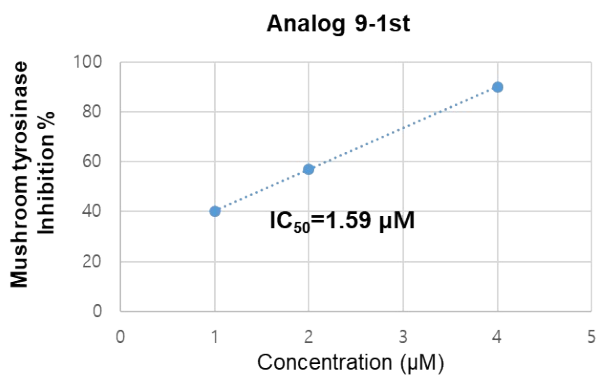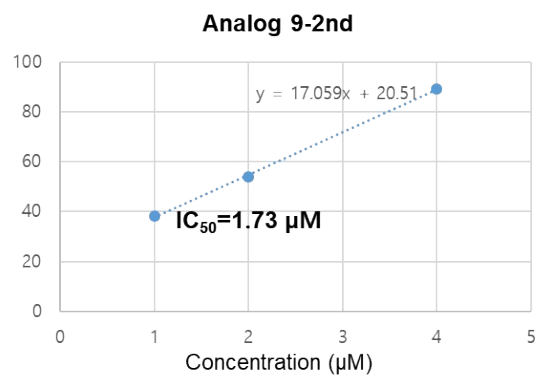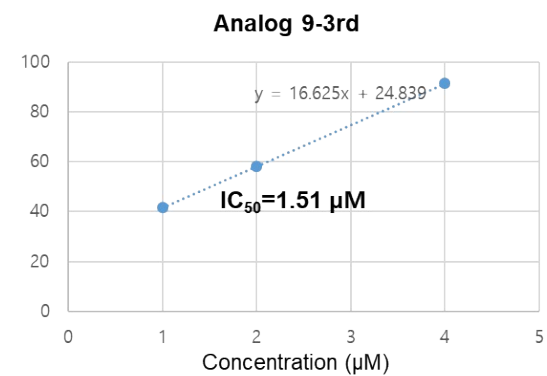

S27. Graphs used to calculate  $\text{IC}_{50}$  values for **8** and **9** in the presence of L-tyrosine

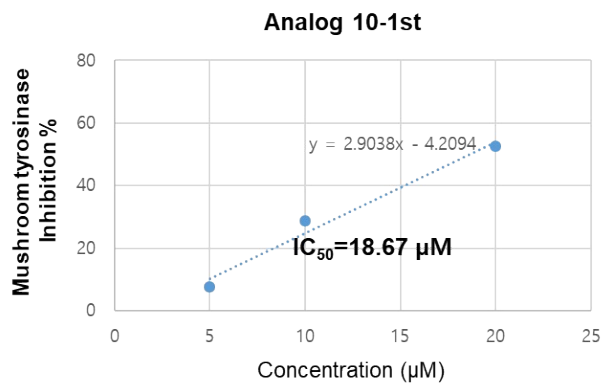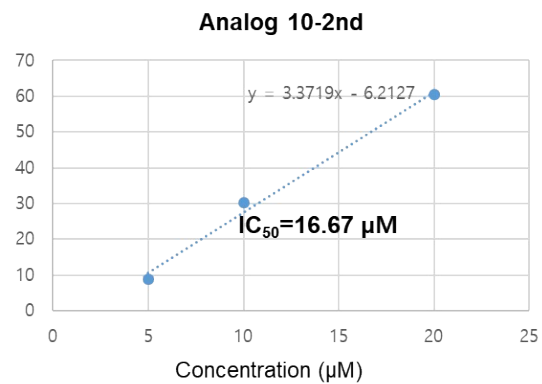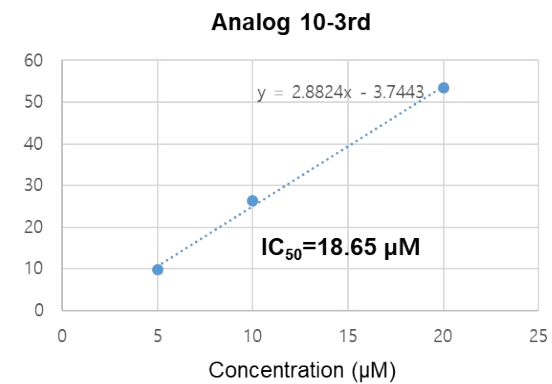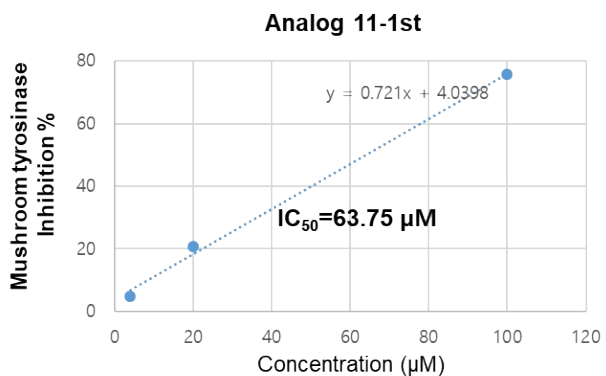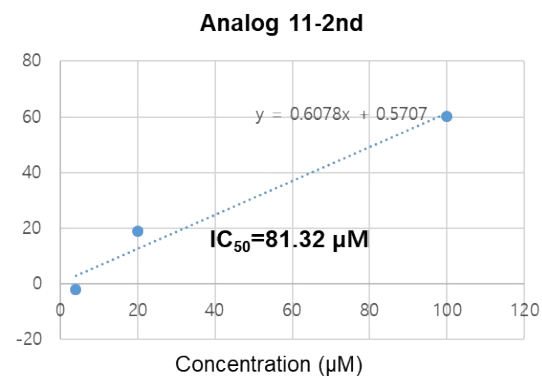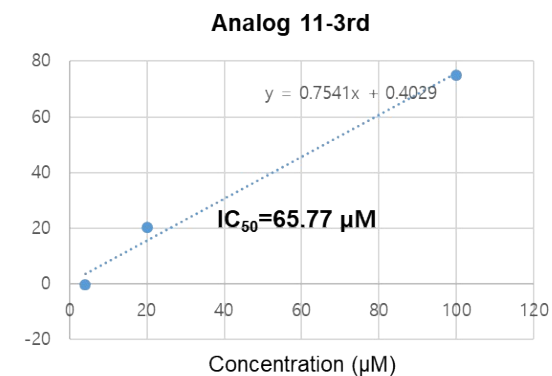

S28. Graphs used to calculate  $\text{IC}_{50}$  values for **10** and **11** in the presence of L-tyrosine

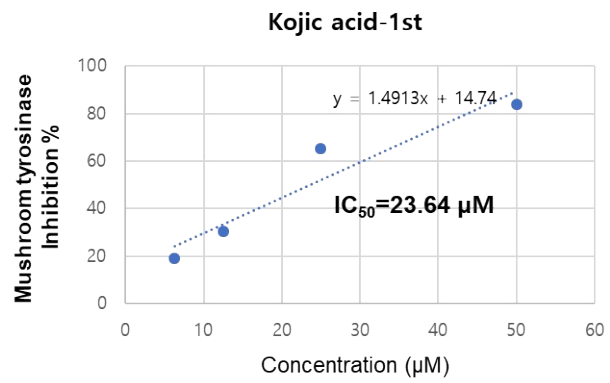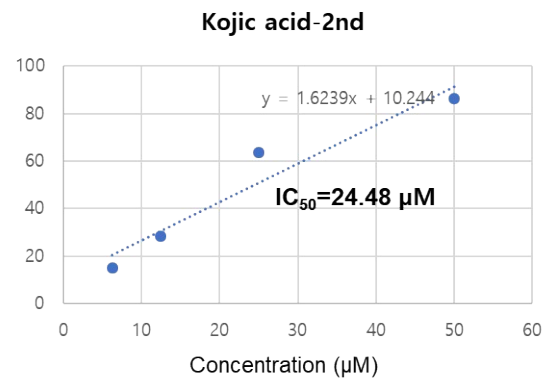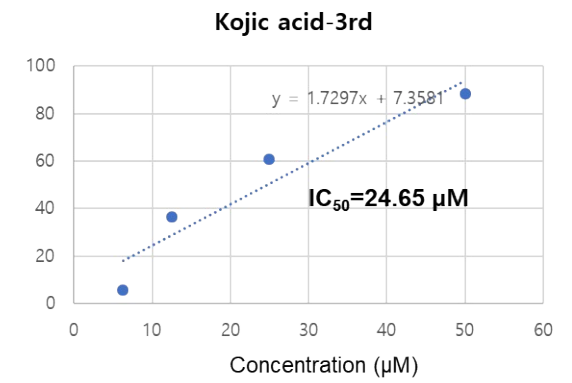

S29. Graphs used to calculate  $\text{IC}_{50}$  values for kojic acid in the presence of L-tyrosine

S30. Raw data used for IC<sub>50</sub> values in the presence of L-dopa**Substrate: L-Dopa**

| Compd    | Conc.( $\mu$ M) | OD1    | OD2    | OD3    | Color control | inhibition (%) |       |        | IC <sub>50</sub> | IC <sub>50</sub><br>average | SEM   |
|----------|-----------------|--------|--------|--------|---------------|----------------|-------|--------|------------------|-----------------------------|-------|
|          |                 |        |        |        |               |                |       |        |                  |                             |       |
| <b>1</b> | 2.5             | 0.1578 | 0.1442 | 0.1419 | 0.0422        | 1.22           | 12.85 | 14.81  | 7.25             | 6.65                        | 0.36  |
|          | 5               | 0.1356 | 0.1274 | 0.11   | 0.0401        | 18.40          | 25.41 | 40.27  | 6.70             |                             |       |
|          | 10              | 0.0609 | 0.0577 | 0.0527 | 0.0409        | 82.91          | 85.65 | 89.92  | 6.00             |                             |       |
| <b>2</b> | 2               | 0.2309 | 0.2388 | 0.2419 | 0.0384        | -3.14          | -7.38 | -9.04  | 25.34            | 25.24                       | 0.31  |
|          | 10              | 0.1778 | 0.1619 | 0.1761 | 0.0379        | 25.04          | 33.56 | 25.95  | 24.67            |                             |       |
|          | 50              | 0.0388 | 0.0389 | 0.0367 | 0.0377        | 99.41          | 99.36 | 100.54 | 25.72            |                             |       |
| <b>3</b> | 2               | 0.2282 | 0.2317 | 0.2287 | 0.0384        | -1.70          | -3.57 | -1.96  | 110.16           | 126.23                      | 11.14 |
|          | 10              | 0.2224 | 0.2226 | 0.2132 | 0.0384        | 1.41           | 1.30  | 6.34   | 120.91           |                             |       |
|          | 50              | 0.1855 | 0.1908 | 0.1944 | 0.0383        | 21.13          | 18.29 | 16.36  | 147.62           |                             |       |
| <b>4</b> | 2               | 0.2245 | 0.2223 | 0.2224 | 0.0392        | 0.71           | 1.89  | 1.84   | 130.32           | 132.25                      | 2.14  |
|          | 10              | 0.2194 | 0.2105 | 0.217  | 0.0408        | 4.30           | 9.07  | 5.59   | 136.53           |                             |       |
|          | 50              | 0.2183 | 0.217  | 0.2168 | 0.0676        | 19.25          | 19.95 | 20.06  | 129.91           |                             |       |
| <b>5</b> | 4               | 0.1569 | 0.1594 | 0.1661 | 0.0416        | 1.48           | -0.66 | -6.38  | 110.13           | 117.86                      | 3.89  |
|          | 20              | 0.148  | 0.1481 | 0.1389 | 0.0484        | 14.90          | 14.81 | 22.67  | 120.86           |                             |       |
|          | 100             | 0.127  | 0.1319 | 0.1339 | 0.0627        | 45.06          | 40.87 | 39.16  | 122.58           |                             |       |
| <b>6</b> | 4               | 0.1669 | 0.1664 | 0.1578 | 0.0467        | -2.71          | -2.28 | 5.07   | 89.16            | 95.31                       | 2.51  |
|          | 20              | 0.1443 | 0.1535 | 0.1333 | 0.0525        | 21.56          | 13.70 | 30.96  | 105.17           |                             |       |
|          | 100             | 0.1378 | 0.1467 | 0.1409 | 0.0844        | 54.37          | 46.77 | 51.72  | 91.59            |                             |       |
| <b>7</b> | 2.5             | 0.1504 | 0.1456 | 0.1396 | 0.0413        | 6.78           | 10.88 | 16.01  | 7.05             | 6.49                        | 0.28  |
|          | 5               | 0.1254 | 0.1192 | 0.123  | 0.041         | 27.88          | 33.18 | 29.93  | 6.21             |                             |       |
|          | 10              | 0.0673 | 0.0513 | 0.0526 | 0.0434        | 79.58          | 93.25 | 92.14  | 6.21             |                             |       |
| <b>8</b> | 4               | 0.1648 | 0.1628 | 0.1753 | 0.0409        | -5.87          | -4.16 | -14.84 | 268.56           | 309.49                      | 52.67 |

|                   |      |        |        |        |        |       |        |        |        |        |       |
|-------------------|------|--------|--------|--------|--------|-------|--------|--------|--------|--------|-------|
|                   | 20   | 0.149  | 0.1524 | 0.1644 | 0.0397 | 6.61  | 3.70   | -6.55  | 414.02 |        |       |
|                   | 100  | 0.1395 | 0.1468 | 0.1449 | 0.0415 | 16.26 | 10.03  | 11.65  | 245.89 |        |       |
| <b>9</b>          | 2    | 0.2134 | 0.2193 | 0.1783 | 0.0376 | 2.77  | -0.50  | 22.18  | 18.83  | 18.03  | 1.35  |
|                   | 10   | 0.1138 | 0.12   | 0.1264 | 0.038  | 58.08 | 54.65  | 51.11  | 19.86  |        |       |
|                   | 50   | 0.0856 | 0.0824 | 0.0818 | 0.0827 | 98.40 | 100.17 | 100.50 | 15.39  |        |       |
| <b>10</b>         | 4    | 0.1572 | 0.189  | 0.1602 | 0.0413 | 0.97  | -26.20 | -1.59  | 108.04 | 98.18  | 9.34  |
|                   | 20   | 0.1498 | 0.1425 | 0.1321 | 0.0402 | 6.35  | 12.59  | 21.48  | 106.98 |        |       |
|                   | 100  | 0.1074 | 0.1112 | 0.0901 | 0.0446 | 46.34 | 43.09  | 61.12  | 79.51  |        |       |
| <b>11</b>         | 4    | 0.1647 | 0.1565 | 0.159  | 0.041  | -5.70 | 1.31   | -0.83  | 195.01 | 257.61 | 32.48 |
|                   | 20   | 0.1546 | 0.1455 | 0.1465 | 0.0409 | 2.85  | 10.62  | 9.77   | 303.94 |        |       |
|                   | 100  | 0.1335 | 0.1387 | 0.1382 | 0.0432 | 22.84 | 18.40  | 18.83  | 273.89 |        |       |
| <b>Kojic acid</b> | 6.25 | 0.0981 | 0.0956 | 0.0977 | 0.0357 | 3.70  | 7.56   | 4.32   | 31.39  | 30.10  | 0.75  |
|                   | 12.5 | 0.0877 | 0.0825 | 0.0873 | 0.0381 | 23.46 | 31.48  | 24.07  | 30.14  |        |       |
|                   | 25   | 0.0757 | 0.0764 | 0.0727 | 0.0372 | 40.59 | 39.51  | 45.22  | 28.78  |        |       |
|                   | 50   | 0.0517 | 0.051  | 0.0467 | 0.0385 | 79.63 | 80.71  | 87.35  |        |        |       |

Substrate: L-Dopa

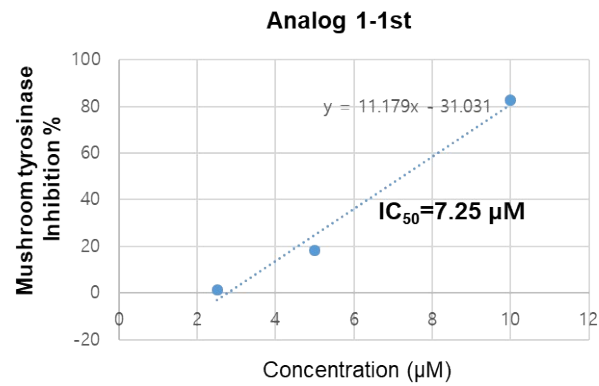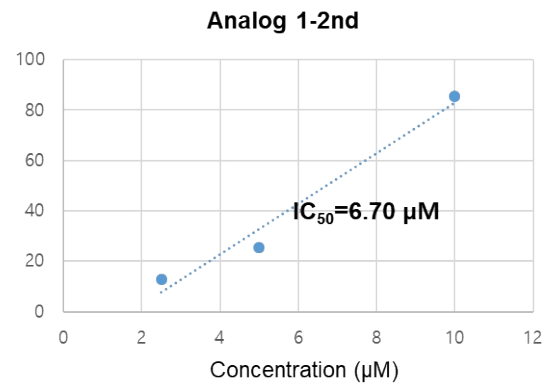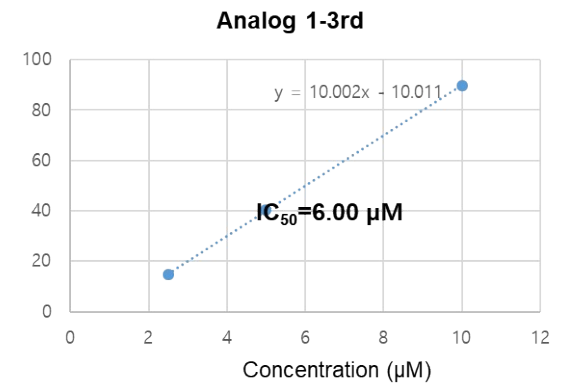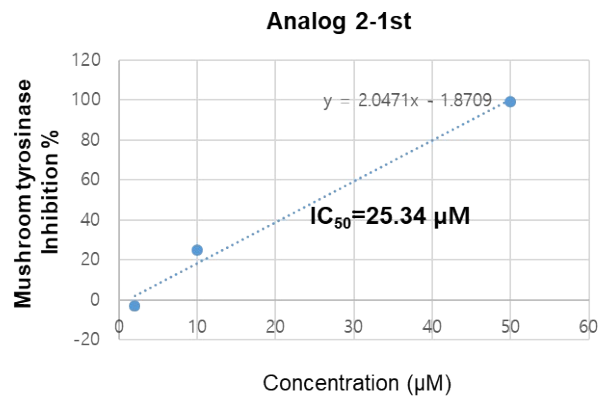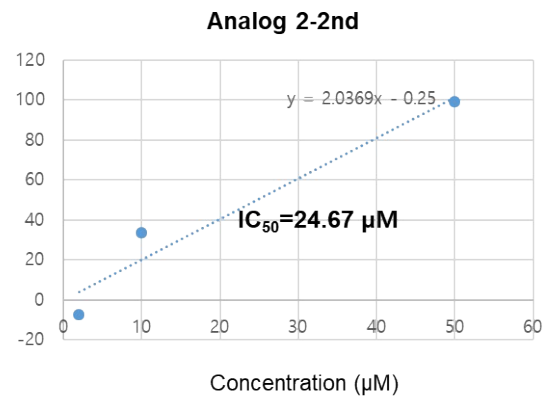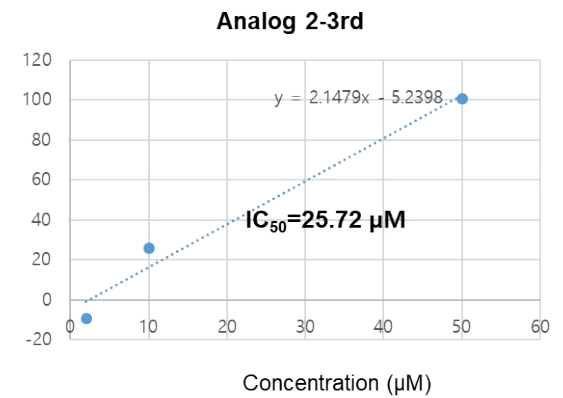

S31. Graphs used to calculate  $\text{IC}_{50}$  values for **1** and **2** in the presence of L-dopa

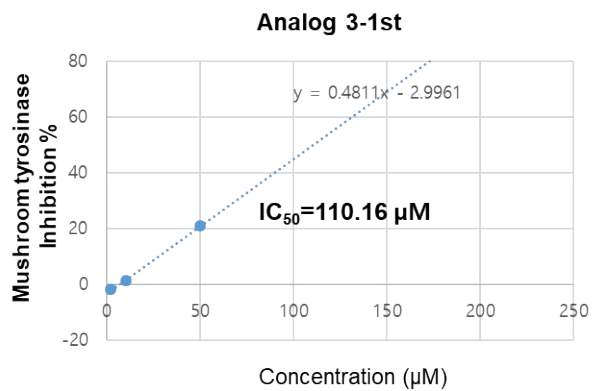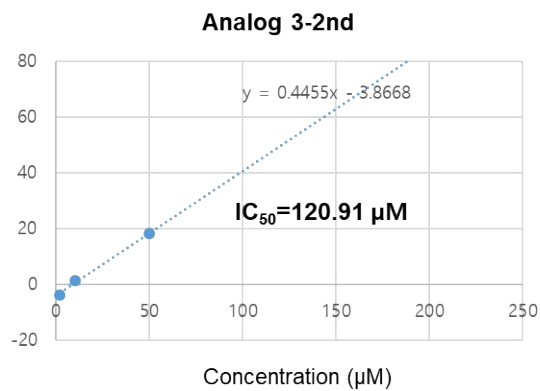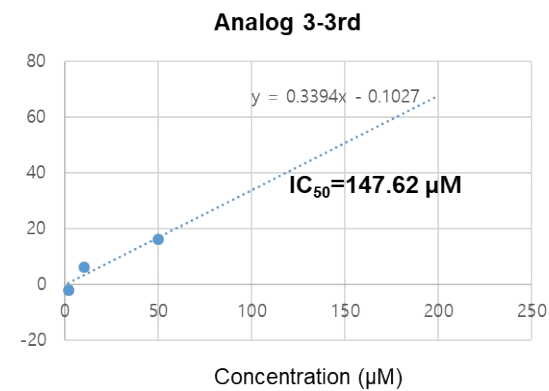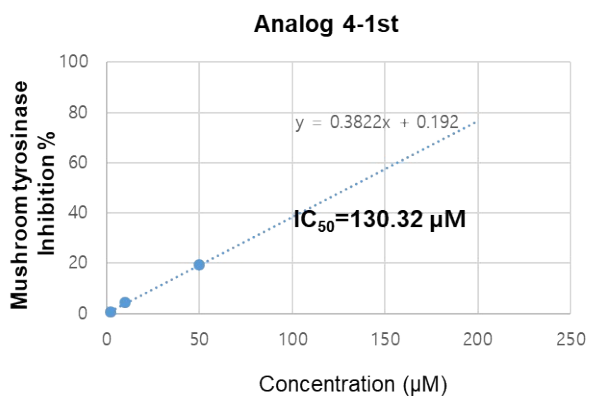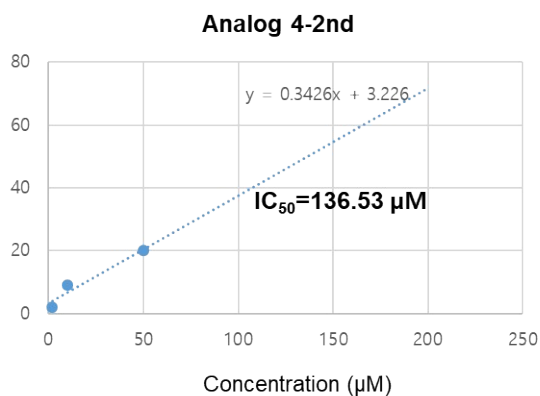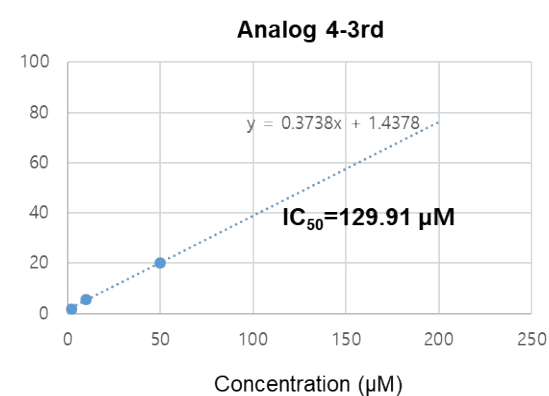

S32. Graphs used to calculate  $\text{IC}_{50}$  values for **3** and **4** in the presence of L-dopa



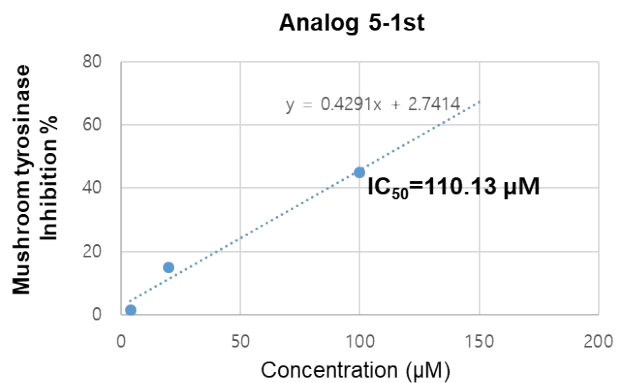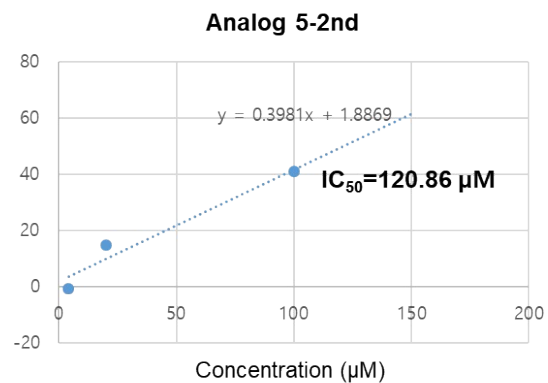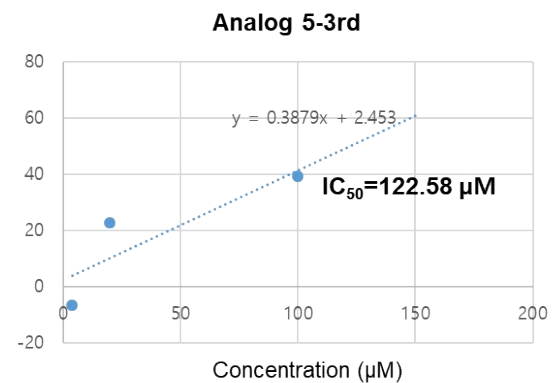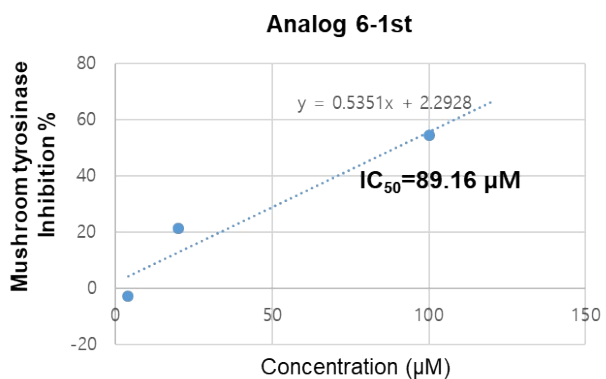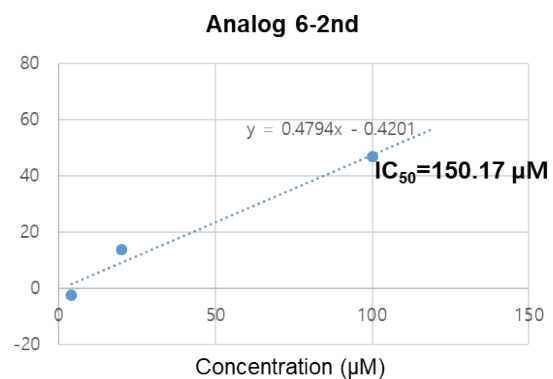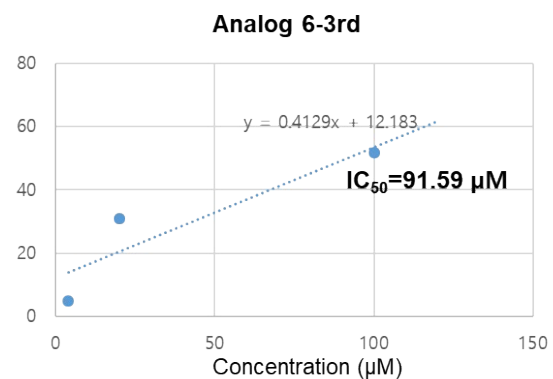

S33. Graphs used to calculate  $\text{IC}_{50}$  values for **5** and **6** in the presence of L-dopa

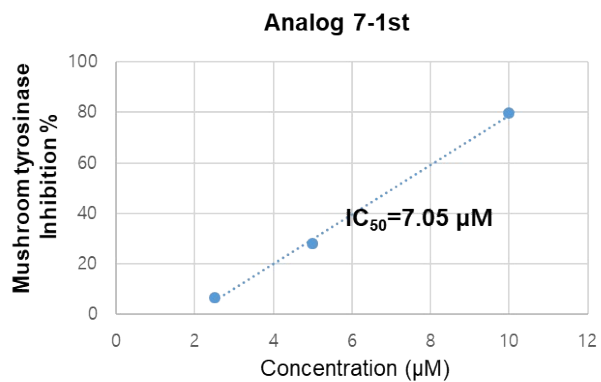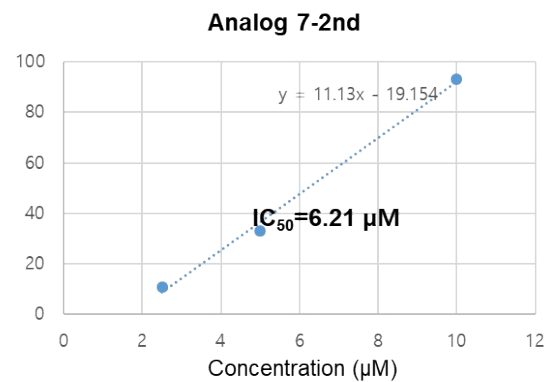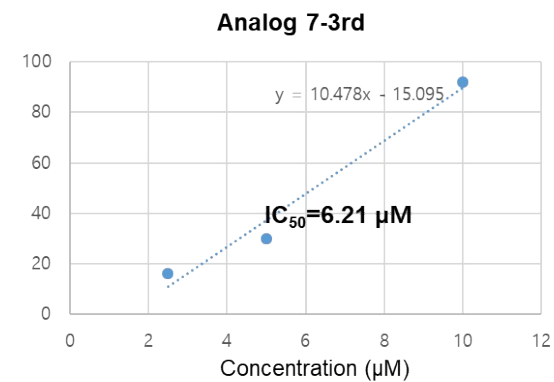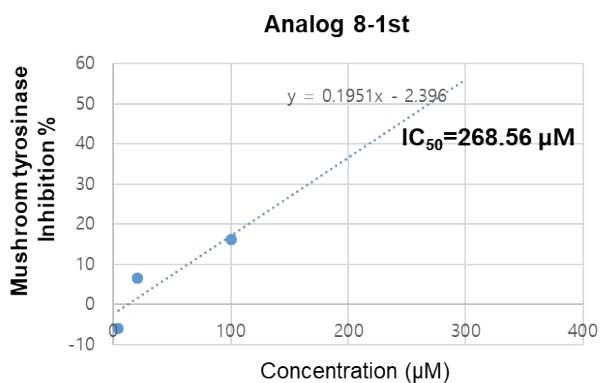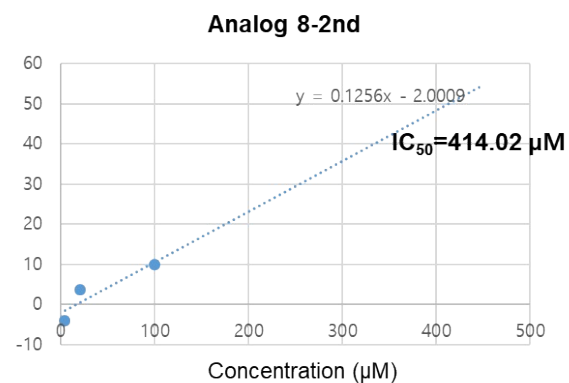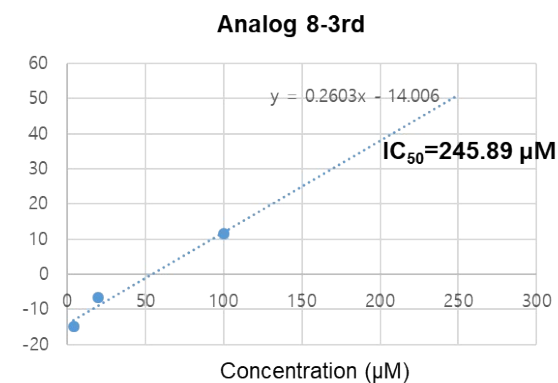

S34. Graphs used to calculate  $IC_{50}$  values for **7** and **8** in the presence of L-dopa

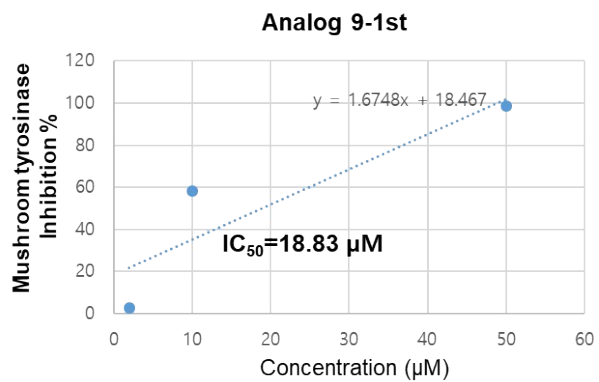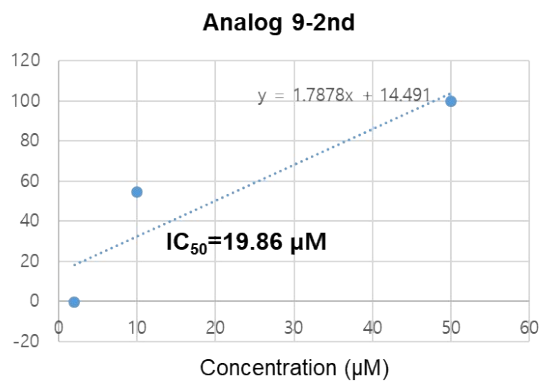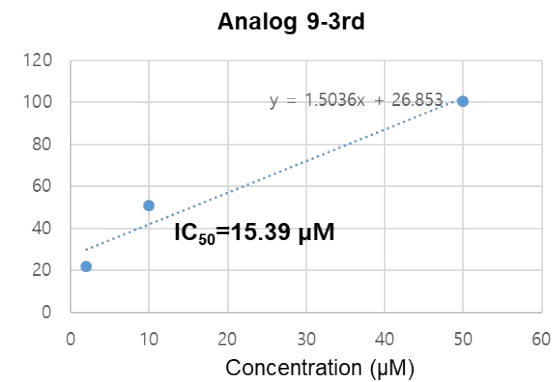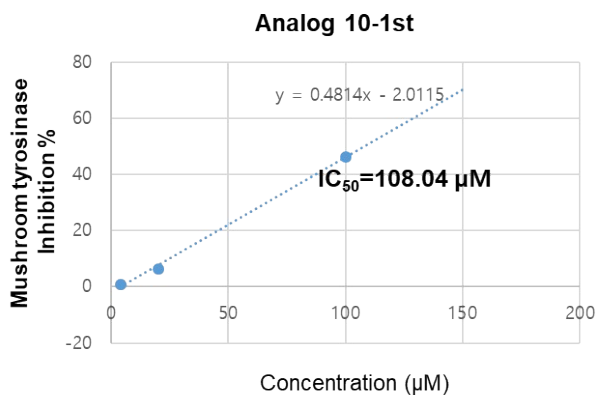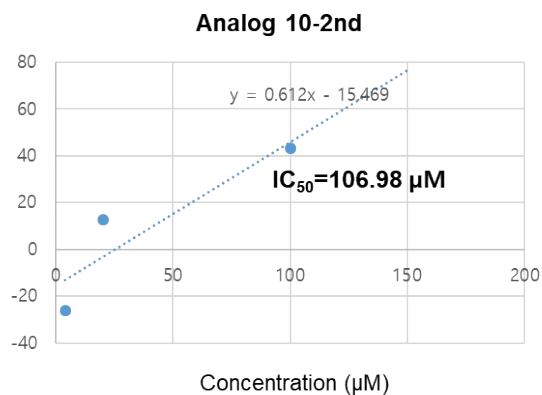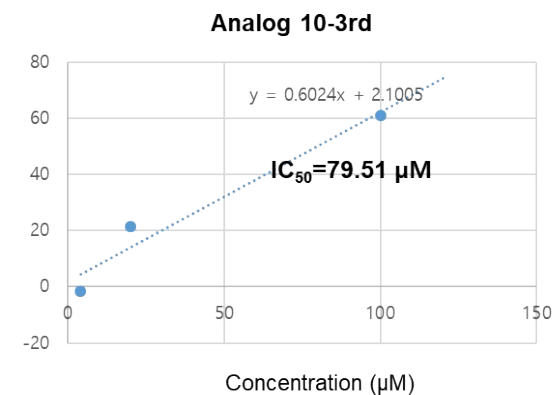

S35. Graphs used to calculate  $\text{IC}_{50}$  values for **9** and **10** in the presence of L-dopa

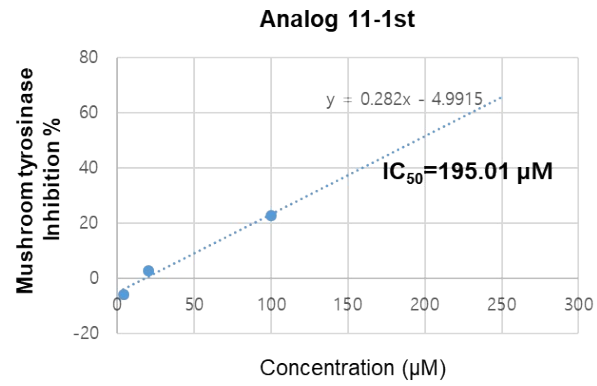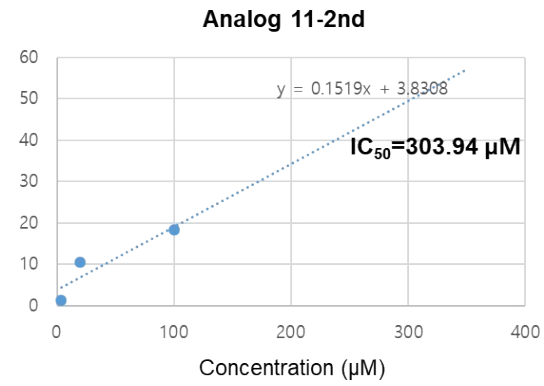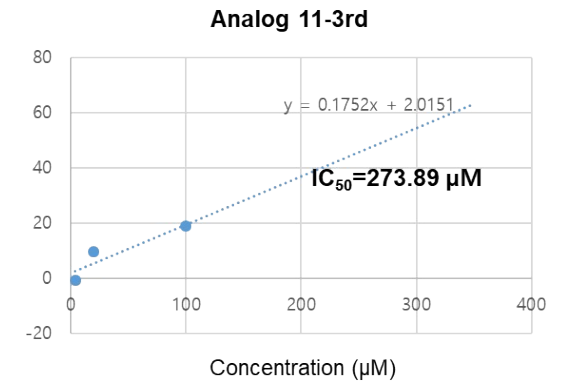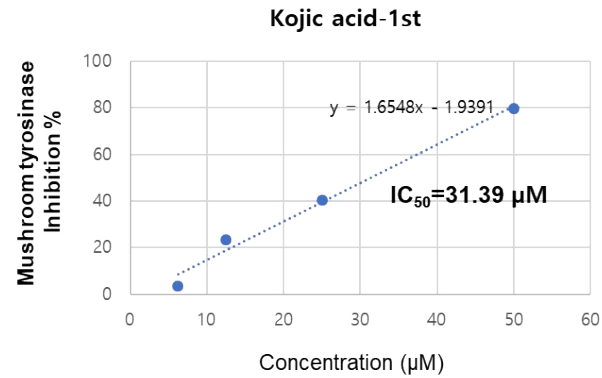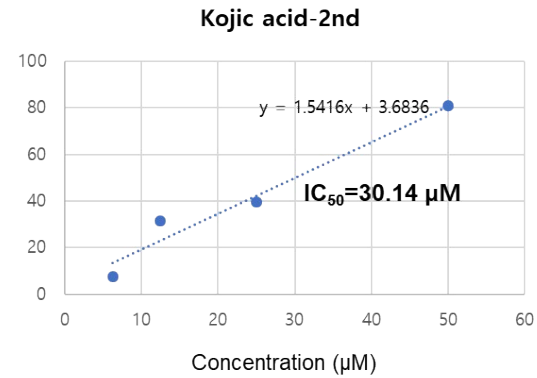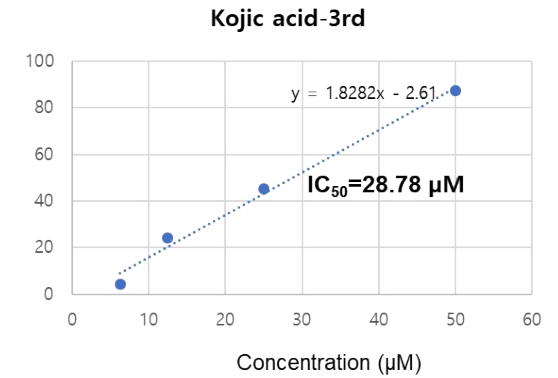

S36. Graphs used to calculate  $\text{IC}_{50}$  values for 11 and kojic acid in the presence of L-dopa

Original blot (1st set)

Tyrosinase 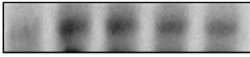

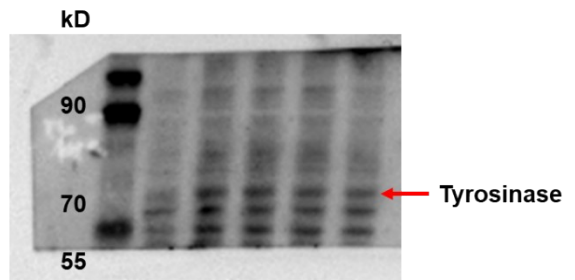

$\beta$ -actin 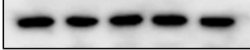

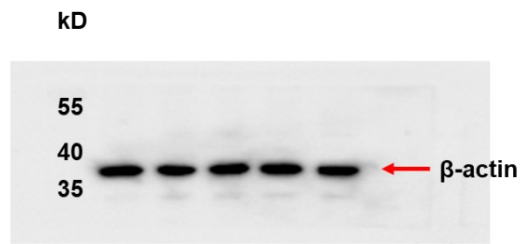

MITF 

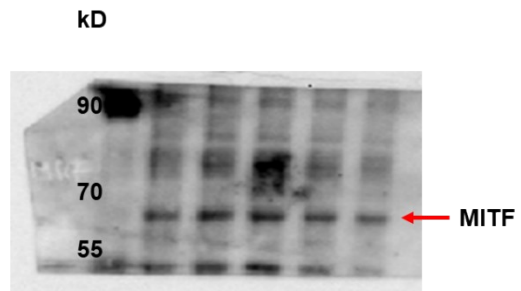

TFIIB 

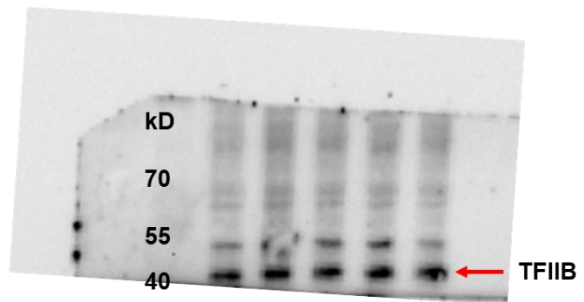

S37. Original western blot for analog 7 (1st set)

## Quantification of band

(A) Tyrosinase

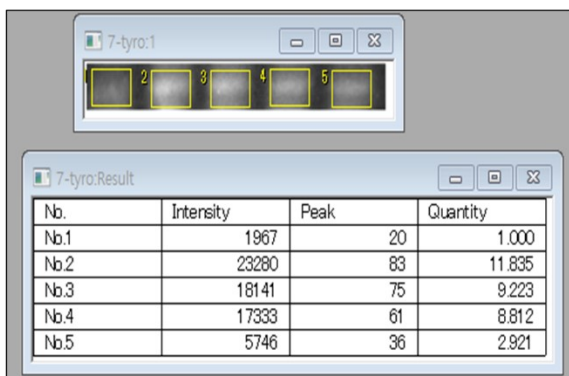

(B)  $\beta$ -actin

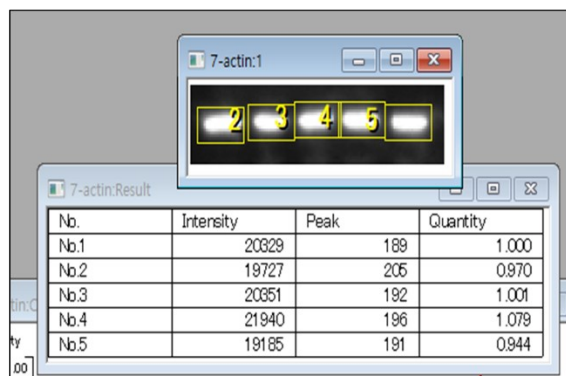

(C) MITF

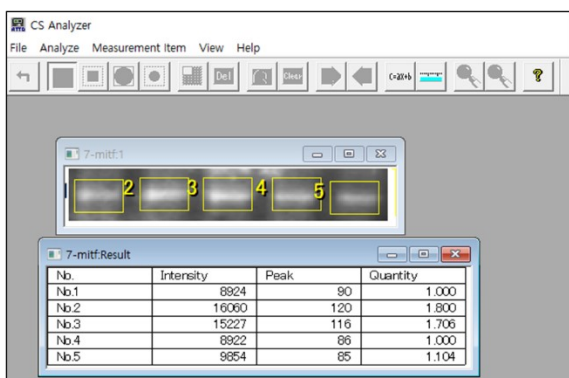

(D) TFIIB

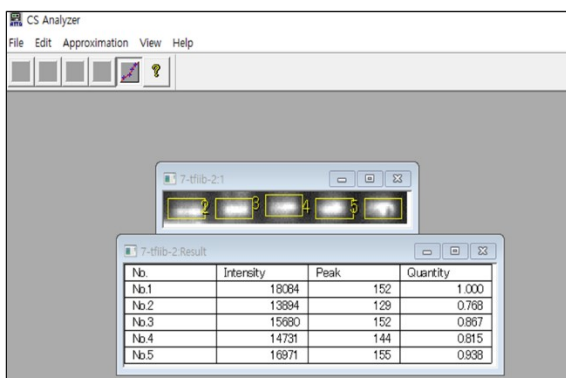

S38. Quantification analysis of protein expressions (A) tyrosinase, (B)  $\beta$ -actin, (c) MITF, and (D) TFIIB for analog 7 by CS analyzer software program

Original blot (2nd set)

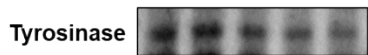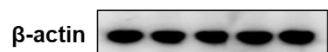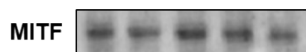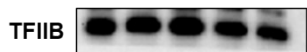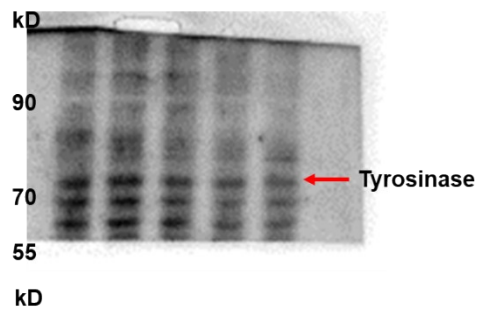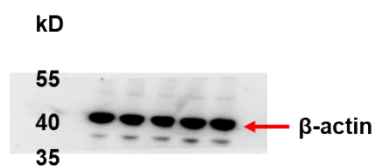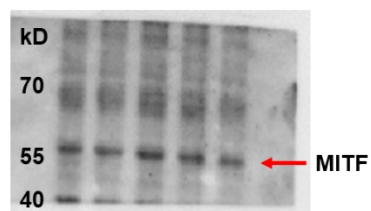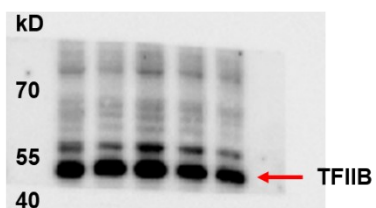

S39. Original western blot for analog 7 (2nd set)

Original blot (3rd set)

Tyrosinase 

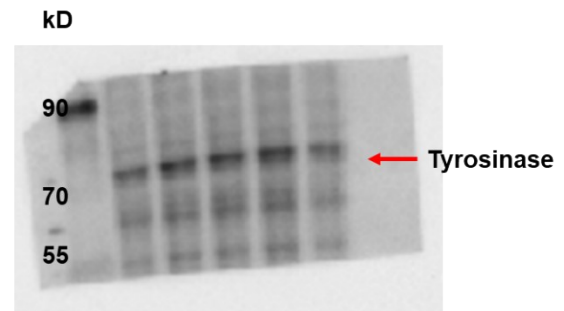

$\beta$ -actin 

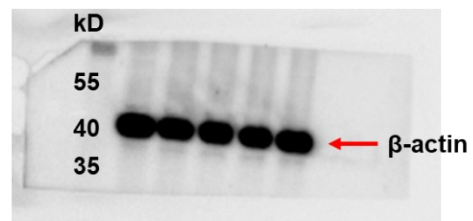

MITF 

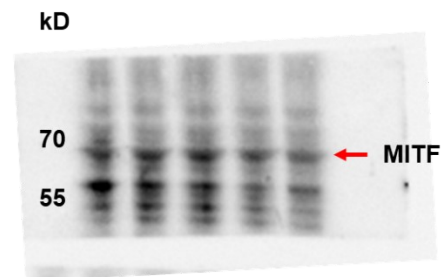

TFIIB 

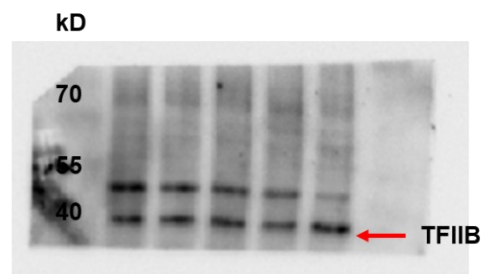

S40. Original western blot for analog 7 (3rd set)



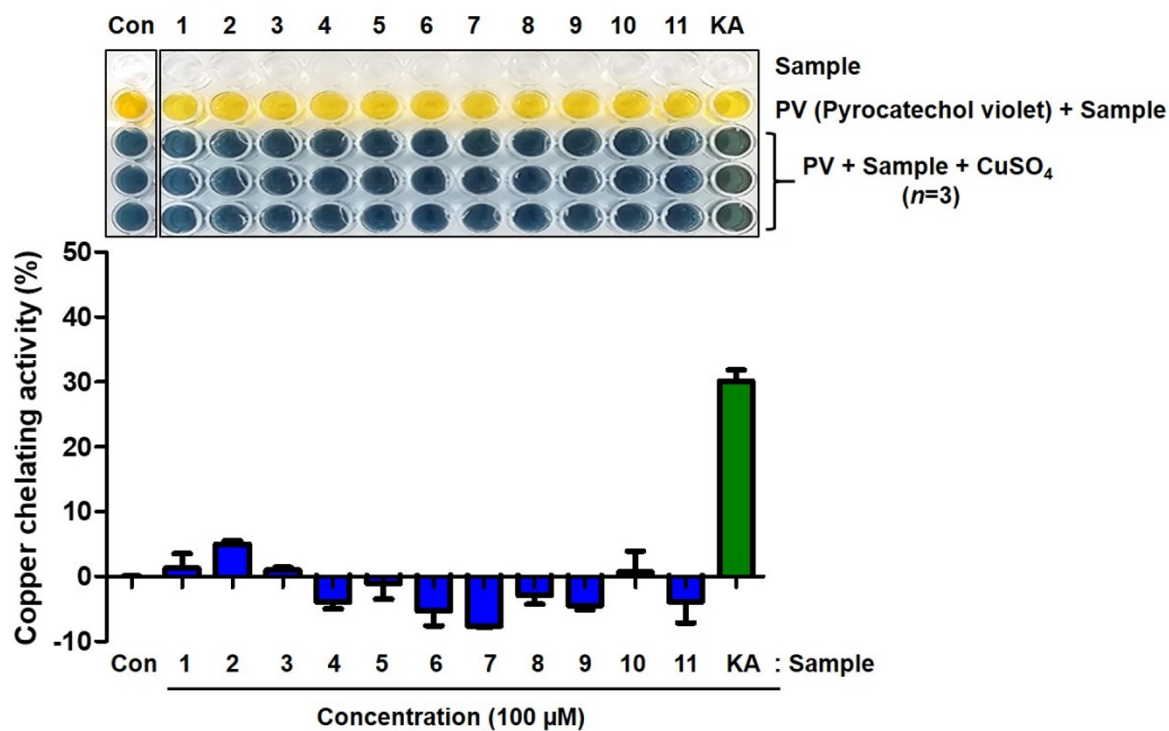

**S41.** Copper chelation activity of kojic acid and 2-MAA analogs **1–11** using a pyrocatechol violet reagent. KA, kojic acid (a positive control). All samples were exposed at a concentration of 100  $\mu\text{M}$  in the presence of 80  $\mu\text{M}$  pyrocatechol violet (PV) and 209  $\mu\text{M}$   $\text{CuSO}_4$ . When PV chelates with copper ions, the color of PV changes to bluish-violet.

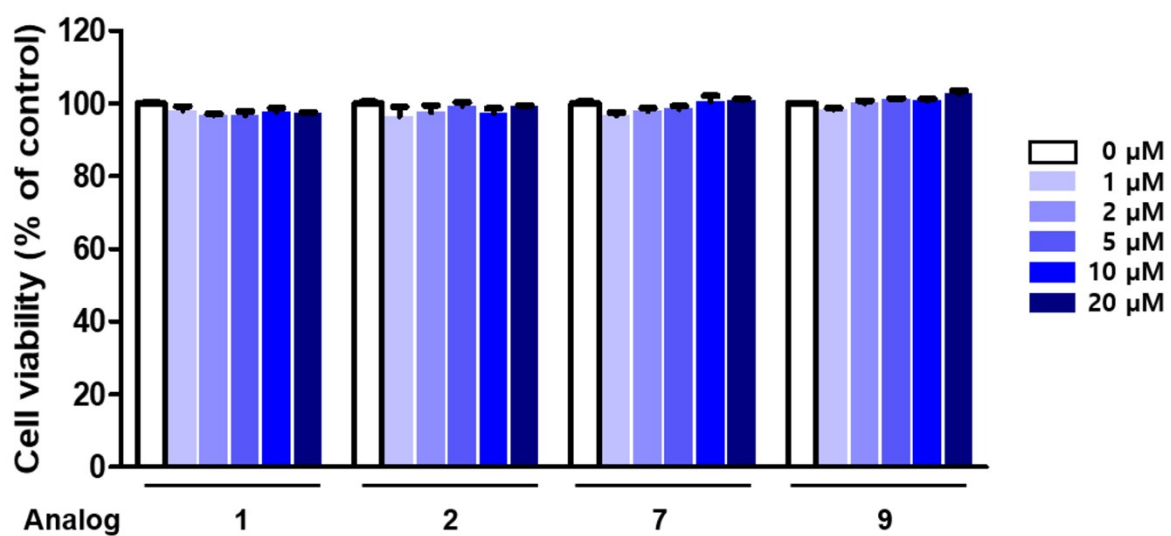

**S42.** Effect of analogs 1, 2, 7, and 9 on HaCaT cell viability. Each analog was exposed at concentrations of 0, 1, 2, 5, 10, and 20 μM for 24 h. HaCaT, human immortal keratinocyte.
